# Supplementary material for: Structure and topology of band structures in the 1651 magnetic space groups
Source: PubMed Central journal article supplement — Sci Adv. 2018 Aug 3;4(8):eaat8685. doi: 10.1126/sciadv.aat8685 (PMC6070365; doi:10.1126/sciadv.aat8685), 2018-08-03
Supplement: aat8685_SM.pdf [file aat8685_SM.pdf]

## Supplementary Materials for

### Structure and topology of band structures in the 1651 magnetic space groups

Haruki Watanabe, Hoi Chun Po, Ashvin Vishwanath\*

\*Corresponding author. Email: ashvinv@berkeley.edu

Published 3 August 2018, *Sci. Adv.* **4**, eaat8685 (2018)

DOI: 10.1126/sciadv.aat8685

#### This PDF file includes:

- Section S1. Tables for spinful electrons
- Section S2. feSMs in stoichiometric compounds
- Section S3. Notations
- Section S4. Compatibility relations
- Section S5. Details of AIs
- Section S6. Details of  $\tilde{T}b$
- Section S7. Magnetic layer groups
- Section S8. Tight-binding model for reSM
- Section S9. Tables for spinless electrons
- Table S1. Characterization of MSGs in the triclinic family for spinful electrons.
- Table S2. Characterization of MSGs in the monoclinic family for spinful electrons.
- Table S3. Characterization of MSGs in the orthorhombic family for spinful electrons.
- Table S4. Characterization of MSGs in the tetragonal family for spinful electrons.
- Table S5. Characterization of MSGs in the hexagonal family for spinful electrons.
- Table S6. Characterization of MSGs in the cubic family for spinful electrons.
- Table S7. Characterization of the projections of MSGs that correspond to MLG, assuming spinful electrons.
- Table S8. MSGs for which spinful electrons exhibit exceptional filling patterns.
- Table S9. MSGs that can host feSMs with nodal-point Fermi surfaces pinned at high-symmetry momenta.
- Table S10. MSGs that can host feSMs with movable nodal Fermi surfaces.
- Table S11. MSGs that can host filling-enforced metals.
- Table S12. Effect of turning on spin-orbit coupling on the fermiology of TR-symmetric filling-enforced (semi)metals.
- Table S13. Characterization of MSGs in the triclinic family for spinless electrons.
- Table S14. Characterization of MSGs in the monoclinic family for spinless electrons.
- Table S15. Characterization of MSGs in the orthorhombic family for spinless electrons.
- Table S16. Characterization of MSGs in the tetragonal family for spinless electrons.
- Table S17. Characterization of MSGs in the hexagonal family for spinless electrons.

Table S18. Characterization of MSGs in the cubic family for spinless electrons.

Table S19. MSGs for which spinless electrons exhibit exceptional filling patterns.

## Section S1. Tables for spinful electrons

Here we include the following tables for spinful electrons:

- Tables S1–S6:  $d$ ,  $X_{\text{BS}}$ , and  $\nu_{\text{BS}}$  for MSGs.
- Table S7:  $d$ ,  $X_{\text{BS}}$ , and  $\nu_{\text{BS}}$  for MLGs.
- Table S8:  $\{\nu\}_{\text{BS}}$  and  $\{\nu\}_{\text{AI}}$  for exceptional MSGs.

Instructions on how to read the tables can be found in Tables I and II of the main text.

We remark that the results on  $d$ ,  $X_{\text{BS}}$ , and  $\nu_{\text{BS}}$  for types I and II MSGs, which account for 460 out of the 1651 entries, were already published in Ref. [15]. For the readers' convenience, we reproduce them here alongside with the new results on the remaining 1191 type III and IV MSGs. Similarly, the data on exceptional filling patterns among the type II MSGs (i.e., for time-reversal symmetric systems) were reported in Refs. [9,10], but are also reproduced below.

Table S1. Characterization of MSGs in the triclinic family for spinful electrons.

| MSG    | $d$ | $X_{\text{BS}}$ | $\nu_{\text{BS}}$ | MSG    | $d$ | $X_{\text{BS}}$ | $\nu_{\text{BS}}$ | MSG     | $d$ | $X_{\text{BS}}$ | $\nu_{\text{BS}}$ | MSG    | $d$ | $X_{\text{BS}}$ | $\nu_{\text{BS}}$ |
|--------|-----|-----------------|-------------------|--------|-----|-----------------|-------------------|---------|-----|-----------------|-------------------|--------|-----|-----------------|-------------------|
| 1.1 I  | 1   | (1)             | 1                 | 1.3 IV | 1   | (1)             | 2                 | 2.5 II  | 9   | (2, 2, 2, 4)    | 2                 | 2.7 IV | 5   | (2)             | 2                 |
| 1.2 II | 1   | (1)             | 2                 | 2.4 I  | 9   | (2, 2, 2, 4)    | 1                 | 2.6 III | 1   | (1)             | 2                 |        |     |                 |                   |

$d$ : Rank of the band structure group  $\{\text{BS}\}$

$X_{\text{BS}}$ : Symmetry-based indicators of band topology

$\nu_{\text{BS}}$ : Set of  $\nu$  bands are symmetry-forbidden from being isolated by band gaps if  $\nu \notin \nu_{\text{BS}} \mathbb{Z}$

Table. S2. Characterization of MSGs in the monoclinic family for spinful electrons.

| MSG  | $d$ | $X_{BS}$ | $\nu_{BS}$ | MSG | $d$   | $X_{BS}$ | $\nu_{BS}$ | MSG       | $d$ | $X_{BS}$ | $\nu_{BS}$ | MSG | $d$     | $X_{BS}$ | $\nu_{BS}$ |     |   |       |   |
|------|-----|----------|------------|-----|-------|----------|------------|-----------|-----|----------|------------|-----|---------|----------|------------|-----|---|-------|---|
| 3.1  | I   | 5        | (2)        | 1   | 7.24  | I        | 1          | (1)       | 2   | 10.47    | IV         | 7   | (2,2)   | 2        | 13.70      | IV  | 4 | (2)   | 4 |
| 3.2  | II  | 1        | (1)        | 2   | 7.25  | II       | 1          | (1)       | 4   | 10.48    | IV         | 6   | (2)     | 2        | 13.71      | IV  | 3 | (2)   | 4 |
| 3.3  | III | 1        | (1)        | 1   | 7.26  | III      | 1          | (1)       | 2   | 10.49    | IV         | 8   | (2)     | 2        | 13.72      | IV  | 5 | (2)   | 2 |
| 3.4  | IV  | 3        | (2)        | 2   | 7.27  | IV       | 1          | (1)       | 4   | 11.50    | I          | 6   | (2)     | 2        | 13.73      | IV  | 3 | (2)   | 4 |
| 3.5  | IV  | 1        | (1)        | 2   | 7.28  | IV       | 1          | (1)       | 2   | 11.51    | II         | 5   | (2,2,4) | 4        | 13.74      | IV  | 4 | (2)   | 4 |
| 3.6  | IV  | 3        | (1)        | 2   | 7.29  | IV       | 1          | (1)       | 4   | 11.52    | III        | 2   | (1)     | 2        | 14.75      | I   | 5 | (2)   | 2 |
| 4.7  | I   | 1        | (1)        | 2   | 7.30  | IV       | 1          | (1)       | 4   | 11.53    | III        | 1   | (1)     | 2        | 14.76      | II  | 5 | (2,4) | 4 |
| 4.8  | II  | 1        | (1)        | 4   | 7.31  | IV       | 1          | (1)       | 2   | 11.54    | III        | 5   | (2,2,4) | 2        | 14.77      | III | 1 | (1)   | 4 |
| 4.9  | III | 1        | (1)        | 2   | 8.32  | I        | 2          | (1)       | 1   | 11.55    | IV         | 3   | (2)     | 4        | 14.78      | III | 1 | (1)   | 4 |
| 4.10 | IV  | 1        | (1)        | 4   | 8.33  | II       | 1          | (1)       | 2   | 11.56    | IV         | 5   | (2)     | 2        | 14.79      | III | 5 | (2,4) | 2 |
| 4.11 | IV  | 1        | (1)        | 2   | 8.34  | III      | 1          | (1)       | 1   | 11.57    | IV         | 3   | (2)     | 4        | 14.80      | IV  | 3 | (2)   | 4 |
| 4.12 | IV  | 1        | (1)        | 2   | 8.35  | IV       | 1          | (1)       | 2   | 12.58    | I          | 10  | (2,2)   | 1        | 14.81      | IV  | 3 | (2)   | 4 |
| 5.13 | I   | 3        | (1)        | 1   | 8.36  | IV       | 1          | (1)       | 2   | 12.59    | II         | 7   | (2,2,4) | 2        | 14.82      | IV  | 3 | (2)   | 4 |
| 5.14 | II  | 1        | (1)        | 2   | 9.37  | I        | 1          | (1)       | 2   | 12.60    | III        | 1   | (1)     | 2        | 14.83      | IV  | 5 | (2)   | 2 |
| 5.15 | III | 1        | (1)        | 1   | 9.38  | II       | 1          | (1)       | 4   | 12.61    | III        | 1   | (1)     | 2        | 14.84      | IV  | 3 | (2)   | 4 |
| 5.16 | IV  | 2        | (1)        | 2   | 9.39  | III      | 1          | (1)       | 2   | 12.62    | III        | 7   | (2,2,4) | 1        | 15.85      | I   | 6 | (2,2) | 2 |
| 5.17 | IV  | 1        | (1)        | 2   | 9.40  | IV       | 1          | (1)       | 2   | 12.63    | IV         | 5   | (2)     | 2        | 15.86      | II  | 5 | (2,4) | 4 |
| 6.18 | I   | 3        | (1)        | 1   | 9.41  | IV       | 1          | (1)       | 4   | 12.64    | IV         | 5   | (2)     | 2        | 15.87      | III | 1 | (1)   | 2 |
| 6.19 | II  | 1        | (1)        | 2   | 10.42 | I        | 15         | (2,2,2)   | 1   | 13.65    | I          | 7   | (2,2)   | 2        | 15.88      | III | 2 | (1)   | 2 |
| 6.20 | III | 1        | (1)        | 1   | 10.43 | II       | 9          | (2,2,2,4) | 2   | 13.66    | II         | 5   | (2,2,4) | 4        | 15.89      | III | 5 | (2,4) | 2 |
| 6.21 | IV  | 1        | (1)        | 2   | 10.44 | III      | 1          | (1)       | 2   | 13.67    | III        | 1   | (1)     | 2        | 15.90      | IV  | 4 | (2)   | 2 |
| 6.22 | IV  | 2        | (1)        | 2   | 10.45 | III      | 1          | (1)       | 2   | 13.68    | III        | 3   | (1)     | 2        | 15.91      | IV  | 3 | (2)   | 4 |
| 6.23 | IV  | 2        | (1)        | 2   | 10.46 | III      | 9          | (2,2,2,4) | 1   | 13.69    | III        | 5   | (2,2,4) | 2        |            |     |   |       |   |

$d$ : Rank of the band structure group  $\{BS\}$

$X_{BS}$ : Symmetry-based indicators of band topology

$\nu_{BS}$ : Set of  $\nu$  bands are symmetry-forbidden from being isolated by band gaps if  $\nu \notin \nu_{BS} \mathbb{Z}$

Table S3. Characterization of MSGs in the orthorhombic family for spinful electrons.

| MSG   | $d$ | $X_{BS}$ | $\nu_{BS}$ | MSG | $d$    | $X_{BS}$ | $\nu_{BS}$ | MSG | $d$ | $X_{BS}$ | $\nu_{BS}$ | MSG | $d$ | $X_{BS}$ | $\nu_{BS}$ |     |   |     |   |
|-------|-----|----------|------------|-----|--------|----------|------------|-----|-----|----------|------------|-----|-----|----------|------------|-----|---|-----|---|
| 16.1  | I   | 1        | (1)        | 2   | 23.51  | III      | 3          | (1) | 1   | 29.101   | III        | 1   | (1) | 4        | 33.151     | IV  | 1 | (1) | 4 |
| 16.2  | II  | 1        | (1)        | 2   | 23.52  | IV       | 1          | (1) | 2   | 29.102   | III        | 1   | (1) | 4        | 33.152     | IV  | 1 | (1) | 4 |
| 16.3  | III | 5        | (2)        | 1   | 24.53  | I        | 4          | (1) | 2   | 29.103   | III        | 1   | (1) | 4        | 33.153     | IV  | 1 | (1) | 4 |
| 16.4  | IV  | 1        | (1)        | 2   | 24.54  | II       | 1          | (1) | 4   | 29.104   | IV         | 1   | (1) | 4        | 33.154     | IV  | 1 | (1) | 4 |
| 16.5  | IV  | 1        | (1)        | 4   | 24.55  | III      | 2          | (1) | 2   | 29.105   | IV         | 1   | (1) | 8        | 33.155     | IV  | 1 | (1) | 4 |
| 16.6  | IV  | 1        | (1)        | 4   | 24.56  | IV       | 3          | (1) | 2   | 29.106   | IV         | 1   | (1) | 4        | 34.156     | I   | 3 | (1) | 2 |
| 17.7  | I   | 5        | (1)        | 2   | 25.57  | I        | 1          | (1) | 2   | 29.107   | IV         | 1   | (1) | 4        | 34.157     | II  | 1 | (1) | 4 |
| 17.8  | II  | 1        | (1)        | 4   | 25.58  | II       | 1          | (1) | 2   | 29.108   | IV         | 1   | (1) | 4        | 34.158     | III | 1 | (1) | 2 |
| 17.9  | III | 1        | (1)        | 2   | 25.59  | III      | 3          | (1) | 1   | 29.109   | IV         | 1   | (1) | 4        | 34.159     | III | 3 | (1) | 2 |
| 17.10 | III | 3        | (2)        | 2   | 25.60  | III      | 5          | (2) | 1   | 29.110   | IV         | 1   | (1) | 4        | 34.160     | IV  | 2 | (1) | 4 |
| 17.11 | IV  | 2        | (1)        | 4   | 25.61  | IV       | 1          | (1) | 4   | 30.111   | I          | 3   | (1) | 2        | 34.161     | IV  | 1 | (1) | 4 |
| 17.12 | IV  | 5        | (1)        | 2   | 25.62  | IV       | 1          | (1) | 2   | 30.112   | II         | 1   | (1) | 4        | 34.162     | IV  | 2 | (1) | 4 |
| 17.13 | IV  | 4        | (1)        | 2   | 25.63  | IV       | 1          | (1) | 4   | 30.113   | III        | 1   | (1) | 2        | 34.163     | IV  | 3 | (2) | 4 |
| 17.14 | IV  | 3        | (1)        | 4   | 25.64  | IV       | 1          | (1) | 4   | 30.114   | III        | 1   | (1) | 2        | 34.164     | IV  | 3 | (1) | 2 |
| 17.15 | IV  | 3        | (1)        | 4   | 25.65  | IV       | 1          | (1) | 4   | 30.115   | III        | 3   | (1) | 2        | 35.165     | I   | 2 | (1) | 2 |
| 18.16 | I   | 3        | (1)        | 2   | 26.66  | I        | 1          | (1) | 2   | 30.116   | IV         | 2   | (1) | 4        | 35.166     | II  | 1 | (1) | 2 |
| 18.17 | II  | 1        | (1)        | 4   | 26.67  | II       | 1          | (1) | 4   | 30.117   | IV         | 3   | (2) | 4        | 35.167     | III | 2 | (1) | 1 |
| 18.18 | III | 3        | (2)        | 2   | 26.68  | III      | 1          | (1) | 2   | 30.118   | IV         | 1   | (1) | 4        | 35.168     | III | 4 | (2) | 1 |
| 18.19 | III | 1        | (1)        | 2   | 26.69  | III      | 3          | (1) | 2   | 30.119   | IV         | 3   | (1) | 2        | 35.169     | IV  | 1 | (1) | 4 |
| 18.20 | IV  | 2        | (1)        | 4   | 26.70  | III      | 1          | (1) | 2   | 30.120   | IV         | 2   | (1) | 4        | 35.170     | IV  | 2 | (1) | 2 |
| 18.21 | IV  | 1        | (1)        | 4   | 26.71  | IV       | 1          | (1) | 4   | 30.121   | IV         | 2   | (1) | 4        | 35.171     | IV  | 2 | (1) | 4 |
| 18.22 | IV  | 2        | (1)        | 4   | 26.72  | IV       | 1          | (1) | 4   | 30.122   | IV         | 2   | (1) | 4        | 36.172     | I   | 1 | (1) | 2 |
| 18.23 | IV  | 3        | (1)        | 2   | 26.73  | IV       | 1          | (1) | 2   | 31.123   | I          | 2   | (1) | 2        | 36.173     | II  | 1 | (1) | 4 |
| 18.24 | IV  | 3        | (1)        | 2   | 26.74  | IV       | 1          | (1) | 2   | 31.124   | II         | 1   | (1) | 4        | 36.174     | III | 1 | (1) | 2 |
| 19.25 | I   | 1        | (1)        | 4   | 26.75  | IV       | 1          | (1) | 4   | 31.125   | III        | 1   | (1) | 2        | 36.175     | III | 2 | (1) | 2 |
| 19.26 | II  | 1        | (1)        | 8   | 26.76  | IV       | 1          | (1) | 4   | 31.126   | III        | 2   | (1) | 2        | 36.176     | III | 1 | (1) | 2 |
| 19.27 | III | 1        | (1)        | 4   | 26.77  | IV       | 1          | (1) | 4   | 31.127   | III        | 1   | (1) | 2        | 36.177     | IV  | 1 | (1) | 2 |
| 19.28 | IV  | 1        | (1)        | 4   | 27.78  | I        | 1          | (1) | 2   | 31.128   | IV         | 2   | (1) | 4        | 36.178     | IV  | 1 | (1) | 4 |
| 19.29 | IV  | 1        | (1)        | 4   | 27.79  | II       | 1          | (1) | 4   | 31.129   | IV         | 1   | (1) | 4        | 36.179     | IV  | 1 | (1) | 2 |
| 19.30 | IV  | 1        | (1)        | 4   | 27.80  | III      | 1          | (1) | 2   | 31.130   | IV         | 1   | (1) | 4        | 37.180     | I   | 2 | (1) | 2 |
| 20.31 | I   | 3        | (1)        | 2   | 27.81  | III      | 5          | (2) | 2   | 31.131   | IV         | 1   | (1) | 4        | 37.181     | II  | 1 | (1) | 4 |
| 20.32 | II  | 1        | (1)        | 4   | 27.82  | IV       | 1          | (1) | 2   | 31.132   | IV         | 2   | (1) | 2        | 37.182     | III | 1 | (1) | 2 |
| 20.33 | III | 1        | (1)        | 2   | 27.83  | IV       | 1          | (1) | 4   | 31.133   | IV         | 2   | (1) | 4        | 37.183     | III | 4 | (2) | 2 |
| 20.34 | III | 2        | (1)        | 2   | 27.84  | IV       | 1          | (1) | 4   | 31.134   | IV         | 2   | (1) | 2        | 37.184     | IV  | 1 | (1) | 2 |
| 20.35 | IV  | 3        | (1)        | 2   | 27.85  | IV       | 1          | (1) | 4   | 32.135   | I          | 3   | (1) | 2        | 37.185     | IV  | 2 | (2) | 4 |
| 20.36 | IV  | 1        | (1)        | 4   | 27.86  | IV       | 1          | (1) | 4   | 32.136   | II         | 1   | (1) | 4        | 37.186     | IV  | 2 | (1) | 2 |
| 20.37 | IV  | 3        | (1)        | 2   | 28.87  | I        | 4          | (1) | 2   | 32.137   | III        | 1   | (1) | 2        | 38.187     | I   | 1 | (1) | 2 |
| 21.38 | I   | 2        | (1)        | 2   | 28.88  | II       | 1          | (1) | 4   | 32.138   | III        | 3   | (2) | 2        | 38.188     | II  | 1 | (1) | 2 |
| 21.39 | II  | 1        | (1)        | 2   | 28.89  | III      | 1          | (1) | 2   | 32.139   | IV         | 1   | (1) | 4        | 38.189     | III | 2 | (1) | 1 |
| 21.40 | III | 4        | (2)        | 1   | 28.90  | III      | 2          | (1) | 2   | 32.140   | IV         | 2   | (1) | 4        | 38.190     | III | 3 | (1) | 1 |
| 21.41 | III | 3        | (1)        | 1   | 28.91  | III      | 3          | (2) | 2   | 32.141   | IV         | 3   | (1) | 2        | 38.191     | III | 3 | (1) | 1 |
| 21.42 | IV  | 1        | (1)        | 2   | 28.92  | IV       | 4          | (1) | 2   | 32.142   | IV         | 2   | (1) | 4        | 38.192     | IV  | 1 | (1) | 2 |
| 21.43 | IV  | 2        | (1)        | 2   | 28.93  | IV       | 2          | (1) | 4   | 32.143   | IV         | 3   | (1) | 4        | 38.193     | IV  | 1 | (1) | 2 |
| 21.44 | IV  | 2        | (1)        | 2   | 28.94  | IV       | 1          | (1) | 4   | 33.144   | I          | 1   | (1) | 4        | 38.194     | IV  | 1 | (1) | 4 |
| 22.45 | I   | 1        | (1)        | 2   | 28.95  | IV       | 2          | (1) | 4   | 33.145   | II         | 1   | (1) | 8        | 39.195     | I   | 1 | (1) | 2 |
| 22.46 | II  | 1        | (1)        | 2   | 28.96  | IV       | 4          | (1) | 4   | 33.146   | III        | 1   | (1) | 4        | 39.196     | II  | 1 | (1) | 4 |
| 22.47 | III | 3        | (1)        | 1   | 28.97  | IV       | 3          | (1) | 2   | 33.147   | III        | 1   | (1) | 4        | 39.197     | III | 2 | (1) | 2 |
| 22.48 | IV  | 1        | (1)        | 2   | 28.98  | IV       | 3          | (1) | 4   | 33.148   | III        | 1   | (1) | 4        | 39.198     | III | 1 | (1) | 2 |
| 23.49 | I   | 1        | (1)        | 2   | 29.99  | I        | 1          | (1) | 4   | 33.149   | IV         | 1   | (1) | 4        | 39.199     | III | 3 | (2) | 2 |
| 23.50 | II  | 1        | (1)        | 2   | 29.100 | II       | 1          | (1) | 8   | 33.150   | IV         | 1   | (1) | 8        | 39.200     | IV  | 1 | (1) | 4 |

(Continued from the previous page)

|        |     |   |              |   |        |     |    |           |   |        |     |   |        |   |        |     |   |           |   |
|--------|-----|---|--------------|---|--------|-----|----|-----------|---|--------|-----|---|--------|---|--------|-----|---|-----------|---|
| 39.201 | IV  | 1 | (1)          | 2 | 47.251 | III | 1  | (1)       | 2 | 51.301 | IV  | 4 | (2)    | 4 | 54.351 | IV  | 3 | (2)       | 4 |
| 39.202 | IV  | 1 | (1)          | 2 | 47.252 | III | 15 | (2, 2, 2) | 1 | 51.302 | IV  | 4 | (2, 2) | 4 | 54.352 | IV  | 3 | (2)       | 8 |
| 40.203 | I   | 3 | (1)          | 2 | 47.253 | III | 1  | (1)       | 2 | 51.303 | IV  | 5 | (2)    | 4 | 55.353 | I   | 7 | (2, 2)    | 2 |
| 40.204 | II  | 1 | (1)          | 4 | 47.254 | IV  | 5  | (2, 2, 4) | 4 | 51.304 | IV  | 4 | (2)    | 4 | 55.354 | II  | 5 | (2, 4)    | 4 |
| 40.205 | III | 1 | (1)          | 2 | 47.255 | IV  | 5  | (2, 4)    | 4 | 52.305 | I   | 5 | (2)    | 4 | 55.355 | III | 1 | (1)       | 4 |
| 40.206 | III | 2 | (1)          | 2 | 47.256 | IV  | 5  | (4)       | 4 | 52.306 | II  | 3 | (4)    | 8 | 55.356 | III | 1 | (1)       | 4 |
| 40.207 | III | 2 | (1)          | 2 | 48.257 | I   | 3  | (2)       | 4 | 52.307 | III | 2 | (1)    | 4 | 55.357 | III | 9 | (2, 2, 2) | 2 |
| 40.208 | IV  | 3 | (1)          | 2 | 48.258 | II  | 3  | (2, 4)    | 4 | 52.308 | III | 1 | (1)    | 4 | 55.358 | III | 5 | (2)       | 2 |
| 40.209 | IV  | 1 | (1)          | 4 | 48.259 | III | 3  | (1)       | 2 | 52.309 | III | 2 | (1)    | 4 | 55.359 | III | 1 | (1)       | 4 |
| 40.210 | IV  | 3 | (1)          | 2 | 48.260 | III | 5  | (2)       | 2 | 52.310 | III | 4 | (2)    | 4 | 55.360 | IV  | 4 | (2, 2)    | 4 |
| 41.211 | I   | 2 | (1)          | 2 | 48.261 | III | 1  | (1)       | 4 | 52.311 | III | 4 | (2)    | 4 | 55.361 | IV  | 3 | (2)       | 4 |
| 41.212 | II  | 1 | (1)          | 4 | 48.262 | IV  | 2  | (2)       | 4 | 52.312 | III | 3 | (2)    | 4 | 55.362 | IV  | 4 | (2)       | 4 |
| 41.213 | III | 1 | (1)          | 2 | 48.263 | IV  | 3  | (2)       | 4 | 52.313 | III | 3 | (1)    | 4 | 55.363 | IV  | 7 | (2, 2)    | 2 |
| 41.214 | III | 1 | (1)          | 2 | 48.264 | IV  | 2  | (2)       | 4 | 52.314 | IV  | 3 | (2)    | 4 | 55.364 | IV  | 5 | (2)       | 4 |
| 41.215 | III | 2 | (2)          | 2 | 49.265 | I   | 6  | (2)       | 2 | 52.315 | IV  | 4 | (2)    | 4 | 56.365 | I   | 3 | (2)       | 4 |
| 41.216 | IV  | 2 | (1)          | 4 | 49.266 | II  | 5  | (2, 2, 4) | 4 | 52.316 | IV  | 3 | (2)    | 8 | 56.366 | II  | 3 | (4)       | 8 |
| 41.217 | IV  | 1 | (1)          | 4 | 49.267 | III | 3  | (1)       | 2 | 52.317 | IV  | 4 | (2)    | 4 | 56.367 | III | 1 | (1)       | 4 |
| 41.218 | IV  | 2 | (1)          | 2 | 49.268 | III | 1  | (1)       | 2 | 52.318 | IV  | 3 | (2)    | 4 | 56.368 | III | 1 | (1)       | 4 |
| 42.219 | I   | 1 | (1)          | 2 | 49.269 | III | 10 | (2, 2)    | 2 | 52.319 | IV  | 4 | (2)    | 4 | 56.369 | III | 5 | (2, 2)    | 4 |
| 42.220 | II  | 1 | (1)          | 2 | 49.270 | III | 7  | (2, 2)    | 2 | 52.320 | IV  | 4 | (2)    | 4 | 56.370 | III | 3 | (2)       | 4 |
| 42.221 | III | 2 | (1)          | 1 | 49.271 | III | 1  | (1)       | 4 | 53.321 | I   | 9 | (2)    | 2 | 56.371 | III | 3 | (1)       | 4 |
| 42.222 | III | 3 | (2)          | 1 | 49.272 | IV  | 3  | (2)       | 4 | 53.322 | II  | 5 | (2, 4) | 4 | 56.372 | IV  | 2 | (2)       | 8 |
| 42.223 | IV  | 1 | (1)          | 2 | 49.273 | IV  | 6  | (2)       | 2 | 53.323 | III | 1 | (1)    | 4 | 56.373 | IV  | 2 | (2)       | 4 |
| 43.224 | I   | 2 | (1)          | 2 | 49.274 | IV  | 4  | (2)       | 4 | 53.324 | III | 2 | (1)    | 4 | 56.374 | IV  | 3 | (2)       | 4 |
| 43.225 | II  | 1 | (1)          | 4 | 49.275 | IV  | 3  | (2)       | 4 | 53.325 | III | 1 | (1)    | 4 | 56.375 | IV  | 3 | (2)       | 4 |
| 43.226 | III | 1 | (1)          | 2 | 49.276 | IV  | 4  | (2)       | 4 | 53.326 | III | 5 | (2)    | 2 | 56.376 | IV  | 2 | (2)       | 4 |
| 43.227 | III | 2 | (1)          | 2 | 50.277 | I   | 3  | (2)       | 4 | 53.327 | III | 8 | (2, 2) | 2 | 57.377 | I   | 4 | (2)       | 4 |
| 43.228 | IV  | 1 | (1)          | 4 | 50.278 | II  | 3  | (2, 4)    | 4 | 53.328 | III | 6 | (2, 2) | 2 | 57.378 | II  | 3 | (2, 4)    | 8 |
| 44.229 | I   | 1 | (1)          | 2 | 50.279 | III | 3  | (1)       | 2 | 53.329 | III | 2 | (1)    | 4 | 57.379 | III | 3 | (1)       | 4 |
| 44.230 | II  | 1 | (1)          | 2 | 50.280 | III | 3  | (1)       | 2 | 53.330 | IV  | 5 | (2)    | 4 | 57.380 | III | 1 | (1)       | 4 |
| 44.231 | III | 2 | (1)          | 1 | 50.281 | III | 5  | (2, 2)    | 2 | 53.331 | IV  | 4 | (2)    | 4 | 57.381 | III | 1 | (1)       | 4 |
| 44.232 | III | 3 | (1)          | 1 | 50.282 | III | 5  | (2)       | 2 | 53.332 | IV  | 6 | (2)    | 4 | 57.382 | III | 4 | (2)       | 4 |
| 44.233 | IV  | 1 | (1)          | 4 | 50.283 | III | 1  | (1)       | 4 | 53.333 | IV  | 5 | (2)    | 4 | 57.383 | III | 4 | (2, 2)    | 4 |
| 44.234 | IV  | 1 | (1)          | 2 | 50.284 | IV  | 3  | (2)       | 4 | 53.334 | IV  | 8 | (2)    | 2 | 57.384 | III | 3 | (2)       | 4 |
| 45.235 | I   | 1 | (1)          | 2 | 50.285 | IV  | 2  | (2)       | 4 | 53.335 | IV  | 6 | (2)    | 4 | 57.385 | III | 2 | (1)       | 4 |
| 45.236 | II  | 1 | (1)          | 4 | 50.286 | IV  | 2  | (2)       | 8 | 53.336 | IV  | 5 | (2)    | 4 | 57.386 | IV  | 2 | (2)       | 8 |
| 45.237 | III | 1 | (1)          | 2 | 50.287 | IV  | 3  | (2)       | 4 | 54.337 | I   | 4 | (2)    | 4 | 57.387 | IV  | 3 | (2)       | 4 |
| 45.238 | III | 3 | (2)          | 2 | 50.288 | IV  | 2  | (2)       | 8 | 54.338 | II  | 3 | (2, 4) | 8 | 57.388 | IV  | 4 | (2)       | 4 |
| 45.239 | IV  | 1 | (1)          | 2 | 51.289 | I   | 7  | (2, 2)    | 2 | 54.339 | III | 1 | (1)    | 4 | 57.389 | IV  | 4 | (2)       | 4 |
| 45.240 | IV  | 1 | (1)          | 4 | 51.290 | II  | 5  | (2, 2, 4) | 4 | 54.340 | III | 2 | (1)    | 4 | 57.390 | IV  | 3 | (2)       | 8 |
| 46.241 | I   | 2 | (1)          | 2 | 51.291 | III | 1  | (1)       | 2 | 54.341 | III | 1 | (1)    | 4 | 57.391 | IV  | 2 | (2)       | 4 |
| 46.242 | II  | 1 | (1)          | 4 | 51.292 | III | 2  | (1)       | 2 | 54.342 | III | 5 | (2, 2) | 4 | 57.392 | IV  | 3 | (2)       | 4 |
| 46.243 | III | 1 | (1)          | 2 | 51.293 | III | 1  | (1)       | 4 | 54.343 | III | 3 | (2)    | 4 | 58.393 | I   | 8 | (2)       | 2 |
| 46.244 | III | 2 | (1)          | 2 | 51.294 | III | 7  | (2, 2)    | 2 | 54.344 | III | 4 | (2, 2) | 4 | 58.394 | II  | 5 | (4)       | 4 |
| 46.245 | III | 2 | (1)          | 2 | 51.295 | III | 6  | (2)       | 2 | 54.345 | III | 4 | (1)    | 4 | 58.395 | III | 1 | (1)       | 4 |
| 46.246 | IV  | 1 | (1)          | 2 | 51.296 | III | 9  | (2, 2, 2) | 2 | 54.346 | IV  | 4 | (2)    | 4 | 58.396 | III | 1 | (1)       | 4 |
| 46.247 | IV  | 2 | (1)          | 2 | 51.297 | III | 3  | (1)       | 2 | 54.347 | IV  | 2 | (2)    | 8 | 58.397 | III | 8 | (2, 2)    | 2 |
| 46.248 | IV  | 2 | (1)          | 4 | 51.298 | IV  | 7  | (2, 2)    | 2 | 54.348 | IV  | 3 | (2)    | 4 | 58.398 | III | 5 | (2)       | 2 |
| 47.249 | I   | 9 | (2, 2, 2, 4) | 2 | 51.299 | IV  | 3  | (2)       | 4 | 54.349 | IV  | 2 | (2)    | 8 | 58.399 | III | 1 | (1)       | 4 |
| 47.250 | II  | 9 | (2, 2, 2, 4) | 2 | 51.300 | IV  | 4  | (2, 2)    | 4 | 54.350 | IV  | 4 | (2)    | 4 | 58.400 | IV  | 4 | (2)       | 4 |

(Continued from the previous page)

|        |     |   |        |   |        |     |   |           |   |        |     |    |           |   |        |     |   |        |   |
|--------|-----|---|--------|---|--------|-----|---|-----------|---|--------|-----|----|-----------|---|--------|-----|---|--------|---|
| 58.401 | IV  | 4 | (2)    | 4 | 62.442 | II  | 3 | (4)       | 8 | 65.483 | III | 1  | (1)       | 2 | 69.524 | III | 9 | (2, 2) | 1 |
| 58.402 | IV  | 5 | (2)    | 4 | 62.443 | III | 1 | (1)       | 4 | 65.484 | III | 1  | (1)       | 2 | 69.525 | III | 1 | (1)    | 2 |
| 58.403 | IV  | 5 | (2)    | 4 | 62.444 | III | 1 | (1)       | 4 | 65.485 | III | 12 | (2, 2, 2) | 1 | 69.526 | IV  | 5 | (4)    | 2 |
| 58.404 | IV  | 8 | (2)    | 2 | 62.445 | III | 2 | (1)       | 4 | 65.486 | III | 10 | (2, 2)    | 1 | 70.527 | I   | 3 | (2)    | 4 |
| 59.405 | I   | 3 | (2)    | 4 | 62.446 | III | 3 | (2)       | 4 | 65.487 | III | 1  | (1)       | 2 | 70.528 | II  | 3 | (4)    | 4 |
| 59.406 | II  | 3 | (2, 4) | 4 | 62.447 | III | 3 | (2)       | 4 | 65.488 | IV  | 4  | (4)       | 4 | 70.529 | III | 2 | (1)    | 2 |
| 59.407 | III | 2 | (1)    | 2 | 62.448 | III | 4 | (2)       | 4 | 65.489 | IV  | 6  | (2, 4)    | 2 | 70.530 | III | 4 | (2)    | 2 |
| 59.408 | III | 1 | (1)    | 4 | 62.449 | III | 1 | (1)       | 4 | 65.490 | IV  | 5  | (4)       | 4 | 70.531 | III | 1 | (1)    | 4 |
| 59.409 | III | 5 | (2, 2) | 2 | 62.450 | IV  | 2 | (2)       | 4 | 66.491 | I   | 7  | (2)       | 2 | 70.532 | IV  | 2 | (2)    | 4 |
| 59.410 | III | 4 | (2)    | 2 | 62.451 | IV  | 3 | (2)       | 4 | 66.492 | II  | 5  | (2, 4)    | 4 | 71.533 | I   | 6 | (4)    | 2 |
| 59.411 | III | 3 | (1)    | 2 | 62.452 | IV  | 2 | (2)       | 8 | 66.493 | III | 2  | (1)       | 2 | 71.534 | II  | 6 | (2, 4) | 2 |
| 59.412 | IV  | 3 | (2)    | 4 | 62.453 | IV  | 2 | (2)       | 4 | 66.494 | III | 1  | (1)       | 2 | 71.535 | III | 1 | (1)    | 2 |
| 59.413 | IV  | 2 | (2)    | 8 | 62.454 | IV  | 3 | (2)       | 4 | 66.495 | III | 9  | (2, 2)    | 2 | 71.536 | III | 9 | (2, 2) | 1 |
| 59.414 | IV  | 2 | (2)    | 8 | 62.455 | IV  | 2 | (2)       | 8 | 66.496 | III | 6  | (2, 2)    | 2 | 71.537 | III | 1 | (1)    | 2 |
| 59.415 | IV  | 3 | (2)    | 4 | 62.456 | IV  | 3 | (2)       | 4 | 66.497 | III | 1  | (1)       | 4 | 71.538 | IV  | 4 | (4)    | 4 |
| 59.416 | IV  | 2 | (2)    | 4 | 63.457 | I   | 5 | (2)       | 2 | 66.498 | IV  | 5  | (2)       | 2 | 72.539 | I   | 4 | (2)    | 2 |
| 60.417 | I   | 4 | (2)    | 4 | 63.458 | II  | 4 | (2, 4)    | 4 | 66.499 | IV  | 4  | (2)       | 4 | 72.540 | II  | 4 | (2, 4) | 4 |
| 60.418 | II  | 3 | (4)    | 8 | 63.459 | III | 2 | (1)       | 2 | 66.500 | IV  | 6  | (2)       | 2 | 72.541 | III | 2 | (1)    | 2 |
| 60.419 | III | 1 | (1)    | 4 | 63.460 | III | 1 | (1)       | 4 | 67.501 | I   | 5  | (2)       | 2 | 72.542 | III | 1 | (1)    | 2 |
| 60.420 | III | 2 | (1)    | 4 | 63.461 | III | 1 | (1)       | 2 | 67.502 | II  | 5  | (2, 2, 4) | 4 | 72.543 | III | 7 | (2, 2) | 2 |
| 60.421 | III | 1 | (1)    | 4 | 63.462 | III | 5 | (2)       | 2 | 67.503 | III | 1  | (1)       | 2 | 72.544 | III | 5 | (2, 2) | 2 |
| 60.422 | III | 3 | (2)    | 4 | 63.463 | III | 6 | (2, 2)    | 2 | 67.504 | III | 2  | (1)       | 2 | 72.545 | III | 1 | (1)    | 4 |
| 60.423 | III | 3 | (2)    | 4 | 63.464 | III | 5 | (2, 2)    | 2 | 67.505 | III | 7  | (2, 2)    | 2 | 72.546 | IV  | 4 | (2)    | 2 |
| 60.424 | III | 4 | (2, 2) | 4 | 63.465 | III | 2 | (1)       | 2 | 67.506 | III | 8  | (2, 2)    | 2 | 72.547 | IV  | 3 | (2)    | 4 |
| 60.425 | III | 2 | (1)    | 4 | 63.466 | IV  | 5 | (2)       | 2 | 67.507 | III | 2  | (1)       | 2 | 73.548 | I   | 3 | (2)    | 4 |
| 60.426 | IV  | 3 | (2)    | 8 | 63.467 | IV  | 3 | (2)       | 4 | 67.508 | IV  | 3  | (2)       | 4 | 73.549 | II  | 3 | (2, 4) | 8 |
| 60.427 | IV  | 2 | (2)    | 8 | 63.468 | IV  | 4 | (2)       | 4 | 67.509 | IV  | 5  | (2)       | 2 | 73.550 | III | 1 | (1)    | 4 |
| 60.428 | IV  | 3 | (2)    | 4 | 64.469 | I   | 5 | (2)       | 2 | 67.510 | IV  | 3  | (2)       | 4 | 73.551 | III | 4 | (2, 2) | 4 |
| 60.429 | IV  | 2 | (2)    | 8 | 64.470 | II  | 4 | (2, 4)    | 4 | 68.511 | I   | 3  | (2)       | 4 | 73.552 | III | 4 | (1)    | 4 |
| 60.430 | IV  | 3 | (2)    | 4 | 64.471 | III | 1 | (1)       | 4 | 68.512 | II  | 3  | (2, 4)    | 4 | 73.553 | IV  | 3 | (2)    | 4 |
| 60.431 | IV  | 4 | (2)    | 4 | 64.472 | III | 1 | (1)       | 4 | 68.513 | III | 2  | (1)       | 2 | 74.554 | I   | 7 | (2)    | 2 |
| 60.432 | IV  | 4 | (2)    | 4 | 64.473 | III | 1 | (1)       | 4 | 68.514 | III | 2  | (1)       | 2 | 74.555 | II  | 5 | (2, 4) | 4 |
| 61.433 | I   | 3 | (2)    | 4 | 64.474 | III | 4 | (2)       | 2 | 68.515 | III | 5  | (2, 2)    | 2 | 74.556 | III | 1 | (1)    | 2 |
| 61.434 | II  | 3 | (4)    | 8 | 64.475 | III | 6 | (2, 2)    | 2 | 68.516 | III | 4  | (2, 2)    | 2 | 74.557 | III | 1 | (1)    | 4 |
| 61.435 | III | 1 | (1)    | 8 | 64.476 | III | 5 | (2, 2)    | 2 | 68.517 | III | 2  | (1)       | 4 | 74.558 | III | 6 | (2, 2) | 2 |
| 61.436 | III | 3 | (2)    | 4 | 64.477 | III | 2 | (1)       | 4 | 68.518 | IV  | 3  | (2)       | 4 | 74.559 | III | 7 | (2, 2) | 2 |
| 61.437 | III | 1 | (1)    | 8 | 64.478 | IV  | 4 | (2)       | 4 | 68.519 | IV  | 3  | (2)       | 4 | 74.560 | III | 2 | (1)    | 2 |
| 61.438 | IV  | 2 | (2)    | 8 | 64.479 | IV  | 3 | (2)       | 4 | 68.520 | IV  | 3  | (2)       | 4 | 74.561 | IV  | 5 | (2)    | 4 |
| 61.439 | IV  | 3 | (2)    | 4 | 64.480 | IV  | 5 | (2)       | 2 | 69.521 | I   | 6  | (4)       | 2 | 74.562 | IV  | 5 | (2)    | 2 |
| 61.440 | IV  | 2 | (2)    | 8 | 65.481 | I   | 8 | (2, 4)    | 2 | 69.522 | II  | 6  | (2, 2, 4) | 2 |        |     |   |        |   |
| 62.441 | I   | 3 | (2)    | 4 | 65.482 | II  | 7 | (2, 2, 4) | 2 | 69.523 | III | 1  | (1)       | 2 |        |     |   |        |   |

$d$ : Rank of the band structure group  $\{\text{BS}\}$

$X_{\text{BS}}$ : Symmetry-based indicators of band topology

$\nu_{\text{BS}}$ : Set of  $\nu$  bands are symmetry-forbidden from being isolated by band gaps if  $\nu \notin \nu_{\text{BS}} \mathbb{Z}$

Table S4. Characterization of MSGs in the tetragonal family for spinful electrons.

| MSG   | $d$ | $X_{BS}$ | $\nu_{BS}$ | MSG | $d$    | $X_{BS}$ | $\nu_{BS}$ | MSG   | $d$ | $X_{BS}$ | $\nu_{BS}$ | MSG | $d$ | $X_{BS}$ | $\nu_{BS}$ |     |   |     |   |
|-------|-----|----------|------------|-----|--------|----------|------------|-------|-----|----------|------------|-----|-----|----------|------------|-----|---|-----|---|
| 75.1  | I   | 8        | (4)        | 1   | 84.51  | I        | 13         | (2,4) | 2   | 90.101   | IV         | 4   | (1) | 2        | 97.151     | I   | 2 | (1) | 2 |
| 75.2  | II  | 3        | (1)        | 2   | 84.52  | II       | 7          | (2,4) | 4   | 90.102   | IV         | 4   | (1) | 2        | 97.152     | II  | 2 | (1) | 2 |
| 75.3  | III | 2        | (1)        | 2   | 84.53  | III      | 7          | (2)   | 2   | 91.103   | I          | 4   | (1) | 4        | 97.153     | III | 1 | (1) | 2 |
| 75.4  | IV  | 3        | (1)        | 2   | 84.54  | III      | 1          | (1)   | 4   | 91.104   | II         | 1   | (1) | 8        | 97.154     | III | 5 | (2) | 1 |
| 75.5  | IV  | 4        | (2)        | 2   | 84.55  | III      | 5          | (2)   | 2   | 91.105   | III        | 3   | (1) | 4        | 97.155     | III | 1 | (1) | 2 |
| 75.6  | IV  | 4        | (1)        | 2   | 84.56  | IV       | 6          | (4)   | 4   | 91.106   | III        | 1   | (1) | 4        | 97.156     | IV  | 2 | (1) | 2 |
| 76.7  | I   | 1        | (1)        | 4   | 84.57  | IV       | 6          | (4)   | 4   | 91.107   | III        | 2   | (1) | 4        | 98.157     | I   | 2 | (1) | 4 |
| 76.8  | II  | 1        | (1)        | 8   | 84.58  | IV       | 7          | (4)   | 4   | 91.108   | IV         | 4   | (1) | 4        | 98.158     | II  | 1 | (1) | 4 |
| 76.9  | III | 1        | (1)        | 4   | 85.59  | I        | 11         | (2,4) | 2   | 91.109   | IV         | 2   | (1) | 8        | 98.159     | III | 3 | (1) | 2 |
| 76.10 | IV  | 1        | (1)        | 4   | 85.60  | II       | 6          | (2,4) | 4   | 91.110   | IV         | 3   | (1) | 4        | 98.160     | III | 2 | (1) | 2 |
| 76.11 | IV  | 1        | (1)        | 8   | 85.61  | III      | 3          | (2)   | 4   | 92.111   | I          | 2   | (1) | 4        | 98.161     | III | 1 | (1) | 4 |
| 76.12 | IV  | 1        | (1)        | 4   | 85.62  | III      | 4          | (1)   | 2   | 92.112   | II         | 1   | (1) | 8        | 98.162     | IV  | 2 | (1) | 4 |
| 77.13 | I   | 4        | (2)        | 2   | 85.63  | III      | 6          | (2)   | 2   | 92.113   | III        | 1   | (1) | 4        | 99.163     | I   | 3 | (1) | 2 |
| 77.14 | II  | 1        | (1)        | 4   | 85.64  | IV       | 5          | (2)   | 4   | 92.114   | III        | 1   | (1) | 4        | 99.164     | II  | 3 | (1) | 2 |
| 77.15 | III | 2        | (1)        | 2   | 85.65  | IV       | 6          | (2)   | 4   | 92.115   | III        | 2   | (1) | 4        | 99.165     | III | 2 | (1) | 2 |
| 77.16 | IV  | 1        | (1)        | 4   | 85.66  | IV       | 5          | (2)   | 4   | 92.116   | IV         | 2   | (1) | 4        | 99.166     | III | 1 | (1) | 2 |
| 77.17 | IV  | 2        | (2)        | 4   | 86.67  | I        | 9          | (2,2) | 2   | 92.117   | IV         | 1   | (1) | 8        | 99.167     | III | 8 | (4) | 1 |
| 77.18 | IV  | 2        | (1)        | 4   | 86.68  | II       | 5          | (2,4) | 4   | 92.118   | IV         | 2   | (1) | 4        | 99.168     | IV  | 3 | (1) | 4 |
| 78.19 | I   | 1        | (1)        | 4   | 86.69  | III      | 3          | (2)   | 4   | 93.119   | I          | 1   | (1) | 4        | 99.169     | IV  | 2 | (1) | 4 |
| 78.20 | II  | 1        | (1)        | 8   | 86.70  | III      | 2          | (1)   | 4   | 93.120   | II         | 1   | (1) | 4        | 99.170     | IV  | 2 | (1) | 4 |
| 78.21 | III | 1        | (1)        | 4   | 86.71  | III      | 6          | (2)   | 2   | 93.121   | III        | 1   | (1) | 2        | 100.171    | I   | 4 | (1) | 2 |
| 78.22 | IV  | 1        | (1)        | 4   | 86.72  | IV       | 4          | (2)   | 4   | 93.122   | III        | 4   | (2) | 2        | 100.172    | II  | 2 | (1) | 4 |
| 78.23 | IV  | 1        | (1)        | 8   | 86.73  | IV       | 5          | (2)   | 4   | 93.123   | III        | 2   | (1) | 2        | 100.173    | III | 1 | (1) | 4 |
| 78.24 | IV  | 1        | (1)        | 4   | 86.74  | IV       | 4          | (2)   | 4   | 93.124   | IV         | 1   | (1) | 4        | 100.174    | III | 2 | (1) | 2 |
| 79.25 | I   | 5        | (2)        | 1   | 87.75  | I        | 16         | (4,4) | 1   | 93.125   | IV         | 1   | (1) | 4        | 100.175    | III | 5 | (4) | 2 |
| 79.26 | II  | 2        | (1)        | 2   | 87.76  | II       | 9          | (2,8) | 2   | 93.126   | IV         | 1   | (1) | 4        | 100.176    | IV  | 2 | (1) | 4 |
| 79.27 | III | 1        | (1)        | 2   | 87.77  | III      | 5          | (4)   | 2   | 94.127   | I          | 2   | (1) | 4        | 100.177    | IV  | 4 | (1) | 2 |
| 79.28 | IV  | 2        | (1)        | 2   | 87.78  | III      | 2          | (1)   | 2   | 94.128   | II         | 1   | (1) | 4        | 100.178    | IV  | 4 | (1) | 4 |
| 80.29 | I   | 2        | (1)        | 2   | 87.79  | III      | 5          | (2)   | 2   | 94.129   | III        | 2   | (1) | 2        | 101.179    | I   | 1 | (1) | 4 |
| 80.30 | II  | 1        | (1)        | 4   | 87.80  | IV       | 8          | (4)   | 2   | 94.130   | III        | 3   | (2) | 2        | 101.180    | II  | 1 | (1) | 4 |
| 80.31 | III | 2        | (1)        | 2   | 88.81  | I        | 8          | (2,2) | 2   | 94.131   | III        | 1   | (1) | 4        | 101.181    | III | 2 | (1) | 4 |
| 80.32 | IV  | 1        | (1)        | 4   | 88.82  | II       | 5          | (4)   | 4   | 94.132   | IV         | 1   | (1) | 4        | 101.182    | III | 1 | (1) | 2 |
| 81.33 | I   | 12       | (2,2,4)    | 1   | 88.83  | III      | 3          | (2)   | 4   | 94.133   | IV         | 2   | (1) | 4        | 101.183    | III | 4 | (2) | 2 |
| 81.34 | II  | 5        | (2)        | 2   | 88.84  | III      | 1          | (1)   | 4   | 94.134   | IV         | 2   | (1) | 4        | 101.184    | IV  | 1 | (1) | 4 |
| 81.35 | III | 2        | (1)        | 2   | 88.85  | III      | 6          | (2)   | 2   | 95.135   | I          | 4   | (1) | 4        | 101.185    | IV  | 1 | (1) | 4 |
| 81.36 | IV  | 5        | (2)        | 2   | 88.86  | IV       | 4          | (2)   | 4   | 95.136   | II         | 1   | (1) | 8        | 101.186    | IV  | 1 | (1) | 8 |
| 81.37 | IV  | 6        | (2,2)      | 2   | 89.87  | I        | 3          | (1)   | 2   | 95.137   | III        | 3   | (1) | 4        | 102.187    | I   | 2 | (1) | 4 |
| 81.38 | IV  | 6        | (2)        | 2   | 89.88  | II       | 3          | (1)   | 2   | 95.138   | III        | 1   | (1) | 4        | 102.188    | II  | 1 | (1) | 4 |
| 82.39 | I   | 11       | (2,2,2)    | 1   | 89.89  | III      | 1          | (1)   | 2   | 95.139   | III        | 2   | (1) | 4        | 102.189    | III | 1 | (1) | 4 |
| 82.40 | II  | 5        | (2)        | 2   | 89.90  | III      | 8          | (4)   | 1   | 95.140   | IV         | 4   | (1) | 4        | 102.190    | III | 2 | (1) | 2 |
| 82.41 | III | 1        | (1)        | 2   | 89.91  | III      | 2          | (1)   | 2   | 95.141   | IV         | 2   | (1) | 8        | 102.191    | III | 3 | (2) | 2 |
| 82.42 | IV  | 5        | (2)        | 2   | 89.92  | IV       | 3          | (1)   | 2   | 95.142   | IV         | 3   | (1) | 4        | 102.192    | IV  | 1 | (1) | 8 |
| 83.43 | I   | 24       | (4,4,4)    | 1   | 89.93  | IV       | 2          | (1)   | 4   | 96.143   | I          | 2   | (1) | 4        | 102.193    | IV  | 2 | (1) | 4 |
| 83.44 | II  | 13       | (2,4,8)    | 2   | 89.94  | IV       | 2          | (1)   | 4   | 96.144   | II         | 1   | (1) | 8        | 102.194    | IV  | 2 | (1) | 4 |
| 83.45 | III | 8        | (2,4)      | 2   | 90.95  | I        | 4          | (1)   | 2   | 96.145   | III        | 1   | (1) | 4        | 103.195    | I   | 3 | (1) | 2 |
| 83.46 | III | 3        | (1)        | 2   | 90.96  | II       | 2          | (1)   | 4   | 96.146   | III        | 1   | (1) | 4        | 103.196    | II  | 3 | (1) | 4 |
| 83.47 | III | 5        | (2)        | 2   | 90.97  | III      | 2          | (1)   | 2   | 96.147   | III        | 2   | (1) | 4        | 103.197    | III | 2 | (1) | 4 |
| 83.48 | IV  | 11       | (4)        | 2   | 90.98  | III      | 5          | (4)   | 2   | 96.148   | IV         | 2   | (1) | 4        | 103.198    | III | 1 | (1) | 4 |
| 83.49 | IV  | 12       | (4,4)      | 2   | 90.99  | III      | 1          | (1)   | 4   | 96.149   | IV         | 1   | (1) | 8        | 103.199    | III | 8 | (4) | 2 |
| 83.50 | IV  | 12       | (4)        | 2   | 90.100 | IV       | 2          | (1)   | 4   | 96.150   | IV         | 2   | (1) | 4        | 103.200    | IV  | 3 | (1) | 2 |



(Continued from the previous page)

|             |         |             |                |             |                |             |                |
|-------------|---------|-------------|----------------|-------------|----------------|-------------|----------------|
| 103.201 IV  | 2 (1) 4 | 111.251 I   | 5 (2) 2        | 117.301 III | 1 (1) 4        | 124.351 I   | 11 (4) 2       |
| 103.202 IV  | 2 (1) 4 | 111.252 II  | 5 (2) 2        | 117.302 III | 2 (1) 2        | 124.352 II  | 8 (2, 8) 4     |
| 104.203 I   | 4 (1) 2 | 111.253 III | 2 (1) 2        | 117.303 III | 7 (2, 2, 4) 2  | 124.353 III | 3 (1) 2        |
| 104.204 II  | 2 (1) 4 | 111.254 III | 1 (1) 2        | 117.304 IV  | 3 (2) 4        | 124.354 III | 5 (4) 4        |
| 104.205 III | 1 (1) 4 | 111.255 III | 12 (2, 2, 4) 1 | 117.305 IV  | 6 (2) 2        | 124.355 III | 4 (4) 4        |
| 104.206 III | 2 (1) 4 | 111.256 IV  | 3 (2) 4        | 117.306 IV  | 4 (2) 4        | 124.356 III | 3 (2) 4        |
| 104.207 III | 5 (2) 2 | 111.257 IV  | 3 (2) 4        | 118.307 I   | 6 (2) 2        | 124.357 III | 16 (4, 4) 2    |
| 104.208 IV  | 2 (1) 4 | 111.258 IV  | 3 (2) 4        | 118.308 II  | 3 (2) 4        | 124.358 III | 3 (2) 4        |
| 104.209 IV  | 4 (2) 4 | 112.259 I   | 5 (2) 2        | 118.309 III | 1 (1) 4        | 124.359 III | 3 (1) 4        |
| 104.210 IV  | 4 (1) 2 | 112.260 II  | 3 (2) 4        | 118.310 III | 2 (1) 2        | 124.360 IV  | 11 (4) 2       |
| 105.211 I   | 1 (1) 4 | 112.261 III | 2 (1) 2        | 118.311 III | 7 (2, 2, 2) 2  | 124.361 IV  | 6 (4) 4        |
| 105.212 II  | 1 (1) 4 | 112.262 III | 1 (1) 4        | 118.312 IV  | 3 (2) 4        | 124.362 IV  | 7 (4) 4        |
| 105.213 III | 2 (1) 2 | 112.263 III | 8 (2, 2, 2) 2  | 118.313 IV  | 4 (2) 4        | 125.363 I   | 6 (2) 4        |
| 105.214 III | 1 (1) 4 | 112.264 IV  | 5 (2) 2        | 118.314 IV  | 6 (2) 2        | 125.364 II  | 6 (2, 4) 4     |
| 105.215 III | 4 (2) 2 | 112.265 IV  | 3 (2) 4        | 119.315 I   | 5 (2) 2        | 125.365 III | 4 (1) 2        |
| 105.216 IV  | 1 (1) 4 | 112.266 IV  | 3 (2) 4        | 119.316 II  | 5 (2) 2        | 125.366 III | 3 (2) 4        |
| 105.217 IV  | 1 (1) 8 | 113.267 I   | 6 (2) 2        | 119.317 III | 1 (1) 2        | 125.367 III | 3 (2) 4        |
| 105.218 IV  | 1 (1) 4 | 113.268 II  | 3 (2) 4        | 119.318 III | 1 (1) 2        | 125.368 III | 3 (2) 4        |
| 106.219 I   | 2 (1) 4 | 113.269 III | 1 (1) 4        | 119.319 III | 11 (2, 2, 2) 1 | 125.369 III | 11 (2, 4) 2    |
| 106.220 II  | 1 (1) 8 | 113.270 III | 2 (1) 2        | 119.320 IV  | 3 (2) 4        | 125.370 III | 6 (2) 2        |
| 106.221 III | 1 (1) 4 | 113.271 III | 7 (2, 2, 4) 2  | 120.321 I   | 5 (2) 2        | 125.371 III | 2 (1) 4        |
| 106.222 III | 2 (1) 4 | 113.272 IV  | 3 (2) 4        | 120.322 II  | 3 (2) 4        | 125.372 IV  | 4 (2) 4        |
| 106.223 III | 3 (2) 4 | 113.273 IV  | 6 (2) 2        | 120.323 III | 1 (1) 4        | 125.373 IV  | 6 (2) 4        |
| 106.224 IV  | 1 (1) 4 | 113.274 IV  | 4 (2) 4        | 120.324 III | 1 (1) 2        | 125.374 IV  | 4 (2) 8        |
| 106.225 IV  | 2 (1) 4 | 114.275 I   | 6 (2) 2        | 120.325 III | 7 (2, 2, 2) 2  | 126.375 I   | 5 (2) 4        |
| 106.226 IV  | 2 (1) 4 | 114.276 II  | 3 (2) 4        | 120.326 IV  | 5 (2) 2        | 126.376 II  | 4 (4) 4        |
| 107.227 I   | 2 (1) 2 | 114.277 III | 1 (1) 4        | 121.327 I   | 5 (2) 2        | 126.377 III | 4 (1) 2        |
| 107.228 II  | 2 (1) 2 | 114.278 III | 2 (1) 4        | 121.328 II  | 4 (2) 2        | 126.378 III | 2 (2) 4        |
| 107.229 III | 1 (1) 2 | 114.279 III | 7 (2, 2, 2) 2  | 121.329 III | 1 (1) 2        | 126.379 III | 2 (2) 4        |
| 107.230 III | 1 (1) 2 | 114.280 IV  | 3 (2) 4        | 121.330 III | 1 (1) 2        | 126.380 III | 3 (2) 4        |
| 107.231 III | 5 (2) 1 | 114.281 IV  | 4 (2) 4        | 121.331 III | 9 (2, 2, 2) 1  | 126.381 III | 8 (2, 2) 2     |
| 107.232 IV  | 2 (1) 4 | 114.282 IV  | 6 (2) 2        | 121.332 IV  | 4 (2) 2        | 126.382 III | 4 (2) 4        |
| 108.233 I   | 2 (1) 2 | 115.283 I   | 5 (2) 2        | 122.333 I   | 7 (2) 2        | 126.383 III | 2 (1) 4        |
| 108.234 II  | 2 (1) 4 | 115.284 II  | 5 (2) 2        | 122.334 II  | 3 (2) 4        | 126.384 IV  | 5 (2) 4        |
| 108.235 III | 1 (1) 4 | 115.285 III | 2 (1) 2        | 122.335 III | 1 (1) 4        | 126.385 IV  | 4 (2) 8        |
| 108.236 III | 1 (1) 2 | 115.286 III | 1 (1) 2        | 122.336 III | 2 (1) 4        | 126.386 IV  | 5 (2) 4        |
| 108.237 III | 5 (4) 2 | 115.287 III | 12 (2, 2, 4) 1 | 122.337 III | 6 (2, 2) 2     | 127.387 I   | 12 (4, 4) 2    |
| 108.238 IV  | 2 (1) 2 | 115.288 IV  | 3 (2) 4        | 122.338 IV  | 4 (2) 4        | 127.388 II  | 8 (4, 8) 4     |
| 109.239 I   | 1 (1) 4 | 115.289 IV  | 3 (2) 4        | 123.339 I   | 13 (2, 4, 8) 2 | 127.389 III | 2 (1) 4        |
| 109.240 II  | 1 (1) 4 | 115.290 IV  | 3 (2) 4        | 123.340 II  | 13 (2, 4, 8) 2 | 127.390 III | 5 (2, 4) 4     |
| 109.241 III | 2 (1) 2 | 116.291 I   | 5 (2) 2        | 123.341 III | 3 (1) 2        | 127.391 III | 6 (2, 4) 2     |
| 109.242 III | 1 (1) 4 | 116.292 II  | 3 (2) 4        | 123.342 III | 8 (2, 4) 2     | 127.392 III | 3 (2) 4        |
| 109.243 III | 2 (1) 2 | 116.293 III | 2 (1) 4        | 123.343 III | 7 (2, 2, 4) 2  | 127.393 III | 15 (4, 4, 4) 2 |
| 109.244 IV  | 1 (1) 8 | 116.294 III | 1 (1) 2        | 123.344 III | 5 (2) 2        | 127.394 III | 3 (2) 4        |
| 110.245 I   | 1 (1) 4 | 116.295 III | 8 (2, 2, 2) 2  | 123.345 III | 24 (4, 4, 4) 1 | 127.395 III | 2 (1) 4        |
| 110.246 II  | 1 (1) 8 | 116.296 IV  | 5 (2) 2        | 123.346 III | 5 (2) 2        | 127.396 IV  | 6 (4) 4        |
| 110.247 III | 2 (1) 4 | 116.297 IV  | 3 (2) 4        | 123.347 III | 3 (1) 2        | 127.397 IV  | 12 (4, 4) 2    |
| 110.248 III | 1 (1) 4 | 116.298 IV  | 3 (2) 4        | 123.348 IV  | 8 (2, 8) 4     | 127.398 IV  | 8 (4) 4        |
| 110.249 III | 2 (2) 4 | 117.299 I   | 6 (2) 2        | 123.349 IV  | 8 (4, 8) 4     | 128.399 I   | 12 (4) 2       |
| 110.250 IV  | 1 (1) 4 | 117.300 II  | 3 (2) 4        | 123.350 IV  | 7 (8) 4        | 128.400 II  | 7 (8) 4        |

(Continued from the previous page)

|         |     |    |        |   |         |     |    |        |   |         |     |   |        |   |         |     |    |        |   |
|---------|-----|----|--------|---|---------|-----|----|--------|---|---------|-----|---|--------|---|---------|-----|----|--------|---|
| 128.401 | III | 2  | (1)    | 4 | 131.444 | IV  | 6  | (2, 4) | 4 | 135.487 | III | 4 | (4)    | 4 | 138.530 | IV  | 3  | (2)    | 8 |
| 128.402 | III | 4  | (4)    | 4 | 131.445 | IV  | 4  | (4)    | 8 | 135.488 | III | 3 | (2)    | 4 | 139.531 | I   | 9  | (8)    | 2 |
| 128.403 | III | 5  | (4)    | 4 | 131.446 | IV  | 5  | (4)    | 4 | 135.489 | III | 8 | (2, 4) | 4 | 139.532 | II  | 9  | (2, 8) | 2 |
| 128.404 | III | 3  | (2)    | 4 | 132.447 | I   | 6  | (4)    | 4 | 135.490 | III | 3 | (2)    | 4 | 139.533 | III | 2  | (1)    | 2 |
| 128.405 | III | 13 | (4, 4) | 2 | 132.448 | II  | 6  | (2, 4) | 4 | 135.491 | III | 1 | (1)    | 8 | 139.534 | III | 5  | (4)    | 2 |
| 128.406 | III | 3  | (2)    | 4 | 132.449 | III | 1  | (1)    | 4 | 135.492 | IV  | 4 | (4)    | 4 | 139.535 | III | 5  | (4)    | 2 |
| 128.407 | III | 2  | (1)    | 4 | 132.450 | III | 5  | (4)    | 4 | 135.493 | IV  | 6 | (4)    | 4 | 139.536 | III | 5  | (2)    | 2 |
| 128.408 | IV  | 7  | (4)    | 4 | 132.451 | III | 5  | (2)    | 2 | 135.494 | IV  | 6 | (4)    | 4 | 139.537 | III | 16 | (4, 4) | 1 |
| 128.409 | IV  | 8  | (4)    | 4 | 132.452 | III | 3  | (2)    | 4 | 136.495 | I   | 7 | (4)    | 4 | 139.538 | III | 4  | (2)    | 2 |
| 128.410 | IV  | 12 | (4)    | 2 | 132.453 | III | 12 | (2, 4) | 2 | 136.496 | II  | 5 | (4)    | 4 | 139.539 | III | 2  | (1)    | 2 |
| 129.411 | I   | 6  | (2)    | 4 | 132.454 | III | 5  | (2)    | 2 | 136.497 | III | 1 | (1)    | 4 | 139.540 | IV  | 7  | (8)    | 4 |
| 129.412 | II  | 6  | (2, 4) | 4 | 132.455 | III | 1  | (1)    | 4 | 136.498 | III | 4 | (4)    | 4 | 140.541 | I   | 8  | (4)    | 2 |
| 129.413 | III | 2  | (1)    | 4 | 132.456 | IV  | 6  | (4)    | 4 | 136.499 | III | 6 | (2)    | 2 | 140.542 | II  | 7  | (2, 8) | 4 |
| 129.414 | III | 3  | (2)    | 4 | 132.457 | IV  | 4  | (4)    | 4 | 136.500 | III | 3 | (2)    | 4 | 140.543 | III | 2  | (1)    | 2 |
| 129.415 | III | 3  | (2)    | 4 | 132.458 | IV  | 4  | (4)    | 8 | 136.501 | III | 9 | (2, 4) | 2 | 140.544 | III | 4  | (4)    | 4 |
| 129.416 | III | 6  | (2)    | 2 | 133.459 | I   | 4  | (2)    | 4 | 136.502 | III | 3 | (2)    | 4 | 140.545 | III | 4  | (4)    | 2 |
| 129.417 | III | 11 | (2, 4) | 2 | 133.460 | II  | 3  | (4)    | 8 | 136.503 | III | 1 | (1)    | 4 | 140.546 | III | 3  | (2)    | 4 |
| 129.418 | III | 3  | (2)    | 4 | 133.461 | III | 2  | (1)    | 4 | 136.504 | IV  | 4 | (4)    | 8 | 140.547 | III | 13 | (4, 4) | 2 |
| 129.419 | III | 4  | (1)    | 2 | 133.462 | III | 2  | (2)    | 4 | 136.505 | IV  | 6 | (4)    | 4 | 140.548 | III | 4  | (2)    | 2 |
| 129.420 | IV  | 4  | (2)    | 8 | 133.463 | III | 2  | (2)    | 4 | 136.506 | IV  | 7 | (4)    | 4 | 140.549 | III | 2  | (1)    | 4 |
| 129.421 | IV  | 6  | (2)    | 4 | 133.464 | III | 3  | (2)    | 4 | 137.507 | I   | 4 | (2)    | 4 | 140.550 | IV  | 8  | (4)    | 2 |
| 129.422 | IV  | 4  | (2)    | 4 | 133.465 | III | 6  | (2, 2) | 4 | 137.508 | II  | 4 | (4)    | 4 | 141.551 | I   | 6  | (2)    | 4 |
| 130.423 | I   | 5  | (2)    | 4 | 133.466 | III | 4  | (2)    | 4 | 137.509 | III | 1 | (1)    | 4 | 141.552 | II  | 5  | (4)    | 4 |
| 130.424 | II  | 4  | (4)    | 8 | 133.467 | III | 1  | (1)    | 8 | 137.510 | III | 2 | (2)    | 4 | 141.553 | III | 1  | (1)    | 4 |
| 130.425 | III | 2  | (1)    | 4 | 133.468 | IV  | 4  | (2)    | 4 | 137.511 | III | 2 | (2)    | 4 | 141.554 | III | 3  | (2)    | 4 |
| 130.426 | III | 2  | (2)    | 8 | 133.469 | IV  | 4  | (2)    | 4 | 137.512 | III | 6 | (2)    | 2 | 141.555 | III | 4  | (2)    | 4 |
| 130.427 | III | 2  | (2)    | 4 | 133.470 | IV  | 3  | (2)    | 8 | 137.513 | III | 8 | (2, 2) | 2 | 141.556 | III | 6  | (2)    | 2 |
| 130.428 | III | 4  | (2)    | 4 | 134.471 | I   | 5  | (2)    | 4 | 137.514 | III | 3 | (2)    | 4 | 141.557 | III | 8  | (2, 2) | 2 |
| 130.429 | III | 8  | (2, 4) | 4 | 134.472 | II  | 5  | (2, 4) | 4 | 137.515 | III | 2 | (1)    | 4 | 141.558 | III | 3  | (2)    | 4 |
| 130.430 | III | 3  | (2)    | 4 | 134.473 | III | 2  | (1)    | 4 | 137.516 | IV  | 3 | (2)    | 8 | 141.559 | III | 1  | (1)    | 4 |
| 130.431 | III | 4  | (1)    | 4 | 134.474 | III | 3  | (2)    | 4 | 137.517 | IV  | 3 | (2)    | 8 | 141.560 | IV  | 4  | (2)    | 8 |
| 130.432 | IV  | 5  | (2)    | 4 | 134.475 | III | 3  | (2)    | 4 | 137.518 | IV  | 4 | (2)    | 4 | 142.561 | I   | 4  | (2)    | 4 |
| 130.433 | IV  | 4  | (2)    | 4 | 134.476 | III | 3  | (2)    | 4 | 138.519 | I   | 5 | (2)    | 4 | 142.562 | II  | 3  | (4)    | 8 |
| 130.434 | IV  | 5  | (2)    | 4 | 134.477 | III | 9  | (2, 2) | 2 | 138.520 | II  | 4 | (4)    | 8 | 142.563 | III | 1  | (1)    | 4 |
| 131.435 | I   | 7  | (2, 4) | 4 | 134.478 | III | 6  | (2)    | 2 | 138.521 | III | 1 | (1)    | 4 | 142.564 | III | 2  | (2)    | 8 |
| 131.436 | II  | 7  | (2, 4) | 4 | 134.479 | III | 1  | (1)    | 4 | 138.522 | III | 3 | (2)    | 4 | 142.565 | III | 2  | (2)    | 4 |
| 131.437 | III | 1  | (1)    | 4 | 134.480 | IV  | 3  | (2)    | 8 | 138.523 | III | 3 | (2)    | 4 | 142.566 | III | 5  | (2)    | 4 |
| 131.438 | III | 7  | (2)    | 2 | 134.481 | IV  | 4  | (2)    | 4 | 138.524 | III | 4 | (2)    | 4 | 142.567 | III | 5  | (2, 2) | 4 |
| 131.439 | III | 5  | (2, 4) | 4 | 134.482 | IV  | 4  | (2)    | 4 | 138.525 | III | 7 | (2, 2) | 4 | 142.568 | III | 3  | (2)    | 4 |
| 131.440 | III | 5  | (2)    | 2 | 135.483 | I   | 6  | (4)    | 4 | 138.526 | III | 3 | (2)    | 4 | 142.569 | III | 2  | (1)    | 8 |
| 131.441 | III | 13 | (2, 4) | 2 | 135.484 | II  | 4  | (4)    | 8 | 138.527 | III | 2 | (1)    | 4 | 142.570 | IV  | 4  | (2)    | 4 |
| 131.442 | III | 3  | (2)    | 4 | 135.485 | III | 1  | (1)    | 4 | 138.528 | IV  | 4 | (2)    | 4 |         |     |    |        |   |
| 131.443 | III | 1  | (1)    | 4 | 135.486 | III | 4  | (2)    | 4 | 138.529 | IV  | 5 | (2)    | 4 |         |     |    |        |   |

$d$ : Rank of the band structure group  $\{\text{BS}\}$

$X_{\text{BS}}$ : Symmetry-based indicators of band topology

$\nu_{\text{BS}}$ : Set of  $\nu$  bands are symmetry-forbidden from being isolated by band gaps if  $\nu \notin \nu_{\text{BS}} \mathbb{Z}$

Table S5. Characterization of MSGs in the hexagonal family for spinful electrons.

| MSG    | $d$ | $X_{BS}$ | $\nu_{BS}$ | MSG | $d$     | $X_{BS}$ | $\nu_{BS}$ | MSG     | $d$ | $X_{BS}$ | $\nu_{BS}$ | MSG | $d$       | $X_{BS}$ | $\nu_{BS}$ |     |   |     |    |
|--------|-----|----------|------------|-----|---------|----------|------------|---------|-----|----------|------------|-----|-----------|----------|------------|-----|---|-----|----|
| 143.1  | I   | 7        | (3)        | 1   | 156.51  | III      | 7          | (3)     | 1   | 166.101  | III        | 11  | (2, 4)    | 1        | 177.151    | III | 5 | (1) | 1  |
| 143.2  | II  | 4        | (1)        | 2   | 156.52  | IV       | 4          | (1)     | 2   | 166.102  | IV         | 6   | (2)       | 2        | 177.152    | III | 6 | (1) | 1  |
| 143.3  | IV  | 4        | (1)        | 2   | 157.53  | I        | 5          | (1)     | 1   | 167.103  | I          | 7   | (2)       | 2        | 177.153    | III | 9 | (6) | 1  |
| 144.4  | I   | 1        | (1)        | 3   | 157.54  | II       | 3          | (1)     | 2   | 167.104  | II         | 5   | (4)       | 4        | 177.154    | IV  | 4 | (1) | 2  |
| 144.5  | II  | 1        | (1)        | 6   | 157.55  | III      | 5          | (3)     | 1   | 167.105  | III        | 2   | (1)       | 2        | 178.155    | I   | 3 | (1) | 6  |
| 144.6  | IV  | 1        | (1)        | 6   | 157.56  | IV       | 3          | (1)     | 2   | 167.106  | III        | 3   | (1)       | 2        | 178.156    | II  | 1 | (1) | 12 |
| 145.7  | I   | 1        | (1)        | 3   | 158.57  | I        | 4          | (1)     | 2   | 167.107  | III        | 7   | (4)       | 2        | 178.157    | III | 2 | (1) | 6  |
| 145.8  | II  | 1        | (1)        | 6   | 158.58  | II       | 4          | (1)     | 4   | 167.108  | IV         | 6   | (2)       | 2        | 178.158    | III | 2 | (1) | 6  |
| 145.9  | IV  | 1        | (1)        | 6   | 158.59  | III      | 7          | (3)     | 2   | 168.109  | I          | 9   | (6)       | 1        | 178.159    | III | 1 | (1) | 6  |
| 146.10 | I   | 3        | (1)        | 1   | 158.60  | IV       | 4          | (1)     | 2   | 168.110  | II         | 4   | (1)       | 2        | 178.160    | IV  | 3 | (1) | 6  |
| 146.11 | II  | 2        | (1)        | 2   | 159.61  | I        | 4          | (1)     | 2   | 168.111  | III        | 4   | (1)       | 1        | 179.161    | I   | 3 | (1) | 6  |
| 146.12 | IV  | 2        | (1)        | 2   | 159.62  | II       | 3          | (1)     | 4   | 168.112  | IV         | 4   | (1)       | 2        | 179.162    | II  | 1 | (1) | 12 |
| 147.13 | I   | 13       | (2, 12)    | 1   | 159.63  | III      | 5          | (3)     | 2   | 169.113  | I          | 1   | (1)       | 6        | 179.163    | III | 2 | (1) | 6  |
| 147.14 | II  | 9        | (2, 4)     | 2   | 159.64  | IV       | 3          | (1)     | 2   | 169.114  | II         | 1   | (1)       | 12       | 179.164    | III | 2 | (1) | 6  |
| 147.15 | III | 4        | (1)        | 2   | 160.65  | I        | 3          | (1)     | 1   | 169.115  | III        | 1   | (1)       | 6        | 179.165    | III | 1 | (1) | 6  |
| 147.16 | IV  | 7        | (2)        | 2   | 160.66  | II       | 2          | (1)     | 2   | 169.116  | IV         | 1   | (1)       | 6        | 179.166    | IV  | 3 | (1) | 6  |
| 148.17 | I   | 11       | (2, 4)     | 1   | 160.67  | III      | 3          | (1)     | 1   | 170.117  | I          | 1   | (1)       | 6        | 180.167    | I   | 1 | (1) | 6  |
| 148.18 | II  | 8        | (2, 4)     | 2   | 160.68  | IV       | 2          | (1)     | 2   | 170.118  | II         | 1   | (1)       | 12       | 180.168    | II  | 1 | (1) | 6  |
| 148.19 | III | 2        | (1)        | 2   | 161.69  | I        | 2          | (1)     | 2   | 170.119  | III        | 1   | (1)       | 6        | 180.169    | III | 3 | (1) | 3  |
| 148.20 | IV  | 6        | (2)        | 2   | 161.70  | II       | 2          | (1)     | 4   | 170.120  | IV         | 1   | (1)       | 6        | 180.170    | III | 3 | (1) | 3  |
| 149.21 | I   | 6        | (1)        | 1   | 161.71  | III      | 3          | (1)     | 2   | 171.121  | I          | 3   | (2)       | 3        | 180.171    | III | 3 | (2) | 3  |
| 149.22 | II  | 4        | (1)        | 2   | 161.72  | IV       | 2          | (1)     | 2   | 171.122  | II         | 1   | (1)       | 6        | 180.172    | IV  | 1 | (1) | 6  |
| 149.23 | III | 7        | (3)        | 1   | 162.73  | I        | 12         | (2)     | 1   | 171.123  | III        | 1   | (1)       | 3        | 181.173    | I   | 1 | (1) | 6  |
| 149.24 | IV  | 5        | (1)        | 2   | 162.74  | II       | 9          | (2, 4)  | 2   | 171.124  | IV         | 1   | (1)       | 6        | 181.174    | II  | 1 | (1) | 6  |
| 150.25 | I   | 6        | (1)        | 1   | 162.75  | III      | 4          | (1)     | 2   | 172.125  | I          | 3   | (2)       | 3        | 181.175    | III | 3 | (1) | 3  |
| 150.26 | II  | 3        | (1)        | 2   | 162.76  | III      | 3          | (1)     | 2   | 172.126  | II         | 1   | (1)       | 6        | 181.176    | III | 3 | (1) | 3  |
| 150.27 | III | 5        | (3)        | 1   | 162.77  | III      | 13         | (2, 12) | 1   | 172.127  | III        | 1   | (1)       | 3        | 181.177    | III | 3 | (2) | 3  |
| 150.28 | IV  | 4        | (1)        | 2   | 162.78  | IV       | 7          | (2)     | 2   | 172.128  | IV         | 1   | (1)       | 6        | 181.178    | IV  | 1 | (1) | 6  |
| 151.29 | I   | 3        | (1)        | 3   | 163.79  | I        | 8          | (2)     | 2   | 173.129  | I          | 5   | (3)       | 2        | 182.179    | I   | 5 | (1) | 2  |
| 151.30 | II  | 1        | (1)        | 6   | 163.80  | II       | 6          | (4)     | 4   | 173.130  | II         | 3   | (1)       | 4        | 182.180    | II  | 3 | (1) | 4  |
| 151.31 | III | 1        | (1)        | 3   | 163.81  | III      | 4          | (1)     | 2   | 173.131  | III        | 4   | (1)       | 2        | 182.181    | III | 4 | (1) | 2  |
| 151.32 | IV  | 2        | (1)        | 6   | 163.82  | III      | 4          | (1)     | 2   | 173.132  | IV         | 3   | (1)       | 2        | 182.182    | III | 5 | (1) | 2  |
| 152.33 | I   | 3        | (1)        | 3   | 163.83  | III      | 9          | (12)    | 2   | 174.133  | I          | 21  | (3, 3, 3) | 1        | 182.183    | III | 5 | (3) | 2  |
| 152.34 | II  | 1        | (1)        | 6   | 163.84  | IV       | 7          | (2)     | 2   | 174.134  | II         | 10  | (3, 3)    | 2        | 182.184    | IV  | 5 | (1) | 2  |
| 152.35 | III | 1        | (1)        | 3   | 164.85  | I        | 12         | (2)     | 1   | 174.135  | III        | 4   | (1)       | 1        | 183.185    | I   | 4 | (1) | 2  |
| 152.36 | IV  | 2        | (1)        | 6   | 164.86  | II       | 9          | (2, 4)  | 2   | 174.136  | IV         | 11  | (3)       | 2        | 183.186    | II  | 4 | (1) | 2  |
| 153.37 | I   | 3        | (1)        | 3   | 164.87  | III      | 3          | (1)     | 2   | 175.137  | I          | 27  | (6, 6, 6) | 1        | 183.187    | III | 5 | (1) | 1  |
| 153.38 | II  | 1        | (1)        | 6   | 164.88  | III      | 4          | (1)     | 2   | 175.138  | II         | 14  | (6, 12)   | 2        | 183.188    | III | 4 | (1) | 1  |
| 153.39 | III | 1        | (1)        | 3   | 164.89  | III      | 13         | (2, 12) | 1   | 175.139  | III        | 10  | (3, 3)    | 2        | 183.189    | III | 9 | (6) | 1  |
| 153.40 | IV  | 2        | (1)        | 6   | 164.90  | IV       | 7          | (2)     | 2   | 175.140  | III        | 4   | (1)       | 2        | 183.190    | IV  | 4 | (1) | 4  |
| 154.41 | I   | 3        | (1)        | 3   | 165.91  | I        | 8          | (2)     | 2   | 175.141  | III        | 9   | (2, 4)    | 1        | 184.191    | I   | 4 | (1) | 2  |
| 154.42 | II  | 1        | (1)        | 6   | 165.92  | II       | 6          | (4)     | 4   | 175.142  | IV         | 13  | (6)       | 2        | 184.192    | II  | 4 | (1) | 4  |
| 154.43 | III | 1        | (1)        | 3   | 165.93  | III      | 3          | (1)     | 2   | 176.143  | I          | 16  | (3, 6)    | 2        | 184.193    | III | 4 | (1) | 2  |
| 154.44 | IV  | 2        | (1)        | 6   | 165.94  | III      | 5          | (1)     | 2   | 176.144  | II         | 9   | (12)      | 4        | 184.194    | III | 3 | (1) | 2  |
| 155.45 | I   | 4        | (1)        | 1   | 165.95  | III      | 9          | (12)    | 2   | 176.145  | III        | 11  | (3)       | 2        | 184.195    | III | 9 | (6) | 2  |
| 155.46 | II  | 2        | (1)        | 2   | 165.96  | IV       | 7          | (2)     | 2   | 176.146  | III        | 3   | (1)       | 2        | 184.196    | IV  | 4 | (1) | 2  |
| 155.47 | III | 3        | (1)        | 1   | 166.97  | I        | 11         | (2)     | 1   | 176.147  | III        | 7   | (4)       | 2        | 185.197    | I   | 3 | (1) | 2  |
| 155.48 | IV  | 3        | (1)        | 2   | 166.98  | II       | 8          | (2, 4)  | 2   | 176.148  | IV         | 9   | (6)       | 2        | 185.198    | II  | 3 | (1) | 4  |
| 156.49 | I   | 5        | (1)        | 1   | 166.99  | III      | 2          | (1)     | 2   | 177.149  | I          | 4   | (1)       | 2        | 185.199    | III | 5 | (1) | 2  |
| 156.50 | II  | 4        | (1)        | 2   | 166.100 | III      | 2          | (1)     | 2   | 177.150  | II         | 4   | (1)       | 2        | 185.200    | III | 3 | (1) | 2  |

(Continued from the previous page)

|             |    |           |   |             |    |           |   |             |    |           |   |             |    |        |   |
|-------------|----|-----------|---|-------------|----|-----------|---|-------------|----|-----------|---|-------------|----|--------|---|
| 185.201 III | 5  | (3)       | 2 | 188.219 III | 14 | (3, 3)    | 2 | 191.237 III | 7  | (3, 3)    | 2 | 193.255 III | 3  | (1)    | 2 |
| 185.202 IV  | 3  | (1)       | 2 | 188.220 IV  | 12 | (3)       | 2 | 191.238 III | 12 | (2)       | 1 | 193.256 III | 7  | (3)    | 4 |
| 186.203 I   | 3  | (1)       | 2 | 189.221 I   | 10 | (3, 3)    | 2 | 191.239 III | 12 | (2)       | 1 | 193.257 III | 8  | (3)    | 2 |
| 186.204 II  | 3  | (1)       | 4 | 189.222 II  | 7  | (3, 3)    | 2 | 191.240 III | 27 | (6, 6, 6) | 1 | 193.258 III | 8  | (2)    | 2 |
| 186.205 III | 4  | (1)       | 2 | 189.223 III | 4  | (1)       | 1 | 191.241 III | 4  | (1)       | 2 | 193.259 III | 8  | (2)    | 2 |
| 186.206 III | 4  | (1)       | 2 | 189.224 III | 5  | (1)       | 1 | 191.242 IV  | 9  | (12)      | 4 | 193.260 III | 14 | (3, 6) | 2 |
| 186.207 III | 5  | (3)       | 2 | 189.225 III | 15 | (3, 3, 3) | 1 | 192.243 I   | 13 | (6)       | 2 | 193.261 III | 4  | (1)    | 2 |
| 186.208 IV  | 3  | (1)       | 2 | 189.226 IV  | 6  | (3)       | 2 | 192.244 II  | 9  | (12)      | 4 | 193.262 IV  | 10 | (6)    | 2 |
| 187.209 I   | 10 | (3, 3)    | 2 | 190.227 I   | 12 | (3)       | 2 | 192.245 III | 4  | (1)       | 2 | 194.263 I   | 10 | (6)    | 2 |
| 187.210 II  | 10 | (3, 3)    | 2 | 190.228 II  | 6  | (3)       | 4 | 192.246 III | 8  | (3)       | 2 | 194.264 II  | 9  | (12)   | 4 |
| 187.211 III | 6  | (1)       | 1 | 190.229 III | 3  | (1)       | 2 | 192.247 III | 7  | (3)       | 2 | 194.265 III | 3  | (1)    | 2 |
| 187.212 III | 5  | (1)       | 1 | 190.230 III | 4  | (1)       | 2 | 192.248 III | 7  | (2)       | 2 | 194.266 III | 11 | (3)    | 2 |
| 187.213 III | 21 | (3, 3, 3) | 1 | 190.231 III | 12 | (3, 3)    | 2 | 192.249 III | 7  | (2)       | 2 | 194.267 III | 6  | (3)    | 4 |
| 187.214 IV  | 7  | (3)       | 2 | 190.232 IV  | 9  | (3)       | 2 | 192.250 III | 18 | (6, 6)    | 2 | 194.268 III | 8  | (2)    | 2 |
| 188.215 I   | 12 | (3)       | 2 | 191.233 I   | 14 | (6, 12)   | 2 | 192.251 III | 4  | (1)       | 4 | 194.269 III | 8  | (2)    | 2 |
| 188.216 II  | 7  | (3)       | 4 | 191.234 II  | 14 | (6, 12)   | 2 | 192.252 IV  | 13 | (6)       | 2 | 194.270 III | 16 | (3, 6) | 2 |
| 188.217 III | 5  | (1)       | 2 | 191.235 III | 4  | (1)       | 2 | 193.253 I   | 10 | (6)       | 2 | 194.271 III | 4  | (1)    | 2 |
| 188.218 III | 4  | (1)       | 2 | 191.236 III | 10 | (3, 3)    | 2 | 193.254 II  | 8  | (12)      | 4 | 194.272 IV  | 9  | (6)    | 2 |

$d$ : Rank of the band structure group  $\{\text{BS}\}$

$X_{\text{BS}}$ : Symmetry-based indicators of band topology

$\nu_{\text{BS}}$ : Set of  $\nu$  bands are symmetry-forbidden from being isolated by band gaps if  $\nu \notin \nu_{\text{BS}} \mathbb{Z}$

Table S6. Characterization of MSGs in the cubic family for spinful electrons.

| MSG    | $d$ | $X_{BS}$ | $\nu_{BS}$ | MSG | $d$    | $X_{BS}$ | $\nu_{BS}$ | MSG | $d$ | $X_{BS}$ | $\nu_{BS}$ | MSG | $d$    | $X_{BS}$ | $\nu_{BS}$ |     |    |        |    |
|--------|-----|----------|------------|-----|--------|----------|------------|-----|-----|----------|------------|-----|--------|----------|------------|-----|----|--------|----|
| 195.1  | I   | 3        | (1)        | 2   | 206.39 | III      | 3          | (1) | 4*  | 216.77   | IV         | 4   | (2)    | 4        | 224.115    | IV  | 6  | (2)    | 4  |
| 195.2  | II  | 2        | (1)        | 2   | 207.40 | I        | 4          | (1) | 2   | 217.78   | I          | 6   | (2)    | 2        | 225.116    | I   | 11 | (8)    | 2  |
| 195.3  | IV  | 2        | (1)        | 4   | 207.41 | II       | 4          | (1) | 2   | 217.79   | II         | 5   | (2)    | 2        | 225.117    | II  | 11 | (8)    | 2  |
| 196.4  | I   | 3        | (1)        | 2   | 207.42 | III      | 3          | (1) | 2   | 217.80   | III        | 3   | (1)    | 2        | 225.118    | III | 5  | (2)    | 2  |
| 196.5  | II  | 2        | (1)        | 2   | 207.43 | IV       | 3          | (1) | 4   | 218.81   | I          | 6   | (2)    | 2*       | 225.119    | III | 10 | (4)    | 2  |
| 196.6  | IV  | 2        | (1)        | 2*  | 208.44 | I        | 2          | (1) | 4   | 218.82   | II         | 4   | (2)    | 4        | 225.120    | III | 3  | (1)    | 2  |
| 197.7  | I   | 3        | (1)        | 2   | 208.45 | II       | 2          | (1) | 4   | 218.83   | III        | 3   | (1)    | 4        | 225.121    | IV  | 8  | (8)    | 4  |
| 197.8  | II  | 2        | (1)        | 2   | 208.46 | III      | 3          | (1) | 2*  | 218.84   | IV         | 4   | (2)    | 4        | 226.122    | I   | 10 | (4)    | 2* |
| 198.9  | I   | 3        | (1)        | 4   | 208.47 | IV       | 2          | (1) | 4   | 219.85   | I          | 6   | (2)    | 2*       | 226.123    | II  | 8  | (8)    | 4  |
| 198.10 | II  | 2        | (1)        | 8   | 209.48 | I        | 3          | (1) | 2   | 219.86   | II         | 4   | (2)    | 4        | 226.124    | III | 5  | (2)    | 2* |
| 198.11 | IV  | 2        | (1)        | 4*  | 209.49 | II       | 3          | (1) | 2   | 219.87   | III        | 3   | (1)    | 4        | 226.125    | III | 7  | (4)    | 4  |
| 199.12 | I   | 4        | (1)        | 2*  | 209.50 | III      | 3          | (1) | 2   | 219.88   | IV         | 6   | (2)    | 2*       | 226.126    | III | 3  | (1)    | 4  |
| 199.13 | II  | 2        | (1)        | 4*  | 209.51 | IV       | 3          | (1) | 2*  | 220.89   | I          | 7   | (2)    | 2*       | 226.127    | IV  | 10 | (4)    | 2* |
| 200.14 | I   | 11       | (2, 4)     | 2   | 210.52 | I        | 3          | (1) | 4   | 220.90   | II         | 4   | (2)    | 4*       | 227.128    | I   | 9  | (2)    | 4  |
| 200.15 | II  | 8        | (2, 4)     | 2   | 210.53 | II       | 2          | (1) | 4   | 220.91   | III        | 3   | (1)    | 4*       | 227.129    | II  | 8  | (4)    | 4  |
| 200.16 | III | 2        | (1)        | 2   | 210.54 | III      | 3          | (1) | 4   | 221.92   | I          | 14  | (4, 8) | 2        | 227.130    | III | 4  | (2)    | 4  |
| 200.17 | IV  | 6        | (4)        | 4   | 210.55 | IV       | 3          | (1) | 4*  | 221.93   | II         | 14  | (4, 8) | 2        | 227.131    | III | 9  | (2)    | 4  |
| 201.18 | I   | 9        | (2)        | 4   | 211.56 | I        | 3          | (1) | 2   | 221.94   | III        | 6   | (2)    | 2        | 227.132    | III | 2  | (1)    | 4  |
| 201.19 | II  | 6        | (2, 4)     | 4   | 211.57 | II       | 3          | (1) | 2   | 221.95   | III        | 11  | (2, 4) | 2        | 227.133    | IV  | 6  | (2)    | 8  |
| 201.20 | III | 2        | (1)        | 4   | 211.58 | III      | 3          | (1) | 2   | 221.96   | III        | 4   | (1)    | 2        | 228.134    | I   | 7  | (2)    | 4* |
| 201.21 | IV  | 5        | (2)        | 4   | 212.59 | I        | 3          | (1) | 4   | 221.97   | IV         | 8   | (8)    | 4        | 228.135    | II  | 5  | (4)    | 8  |
| 202.22 | I   | 10       | (4)        | 2   | 212.60 | II       | 2          | (1) | 8   | 222.98   | I          | 8   | (2)    | 4        | 228.136    | III | 4  | (2)    | 4* |
| 202.23 | II  | 7        | (4)        | 2   | 212.61 | III      | 3          | (1) | 4   | 222.99   | II         | 6   | (4)    | 4        | 228.137    | III | 6  | (2)    | 8  |
| 202.24 | III | 2        | (1)        | 2   | 212.62 | IV       | 3          | (1) | 4*  | 222.100  | III        | 4   | (2)    | 4        | 228.138    | III | 3  | (1)    | 8  |
| 202.25 | IV  | 6        | (4)        | 2*  | 213.63 | I        | 3          | (1) | 4   | 222.101  | III        | 6   | (2)    | 4        | 228.139    | IV  | 7  | (2)    | 4* |
| 203.26 | I   | 9        | (2)        | 4   | 213.64 | II       | 2          | (1) | 8   | 222.102  | III        | 3   | (1)    | 4        | 229.140    | I   | 11 | (8)    | 2  |
| 203.27 | II  | 6        | (4)        | 4   | 213.65 | III      | 3          | (1) | 4   | 222.103  | IV         | 8   | (2)    | 4        | 229.141    | II  | 11 | (2, 8) | 2  |
| 203.28 | III | 2        | (1)        | 4   | 213.66 | IV       | 3          | (1) | 4*  | 223.104  | I          | 8   | (4)    | 4        | 229.142    | III | 6  | (2)    | 2  |
| 203.29 | IV  | 5        | (2)        | 4*  | 214.67 | I        | 2          | (1) | 4   | 223.105  | II         | 7   | (4)    | 4        | 229.143    | III | 10 | (4)    | 2  |
| 204.30 | I   | 10       | (4)        | 2   | 214.68 | II       | 2          | (1) | 4*  | 223.106  | III        | 6   | (2)    | 2*       | 229.144    | III | 3  | (1)    | 2  |
| 204.31 | II  | 7        | (2, 4)     | 2   | 214.69 | III      | 4          | (1) | 2*  | 223.107  | III        | 7   | (4)    | 4        | 230.145    | I   | 7  | (2)    | 4* |
| 204.32 | III | 2        | (1)        | 2   | 215.70 | I        | 6          | (2) | 2   | 223.108  | III        | 2   | (1)    | 4        | 230.146    | II  | 5  | (4)    | 8* |
| 205.33 | I   | 9        | (2)        | 4   | 215.71 | II       | 6          | (2) | 2   | 223.109  | IV         | 7   | (4)    | 4        | 230.147    | III | 5  | (2)    | 4* |
| 205.34 | II  | 6        | (4)        | 8   | 215.72 | III      | 3          | (1) | 2   | 224.110  | I          | 8   | (2)    | 4        | 230.148    | III | 6  | (2)    | 4* |
| 205.35 | III | 2        | (1)        | 8   | 215.73 | IV       | 4          | (2) | 4   | 224.111  | II         | 8   | (2, 4) | 4        | 230.149    | III | 2  | (1)    | 8  |
| 205.36 | IV  | 5        | (2)        | 8   | 216.74 | I        | 6          | (2) | 2   | 224.112  | III        | 4   | (2)    | 4        |            |     |    |        |    |
| 206.37 | I   | 9        | (2)        | 4   | 216.75 | II       | 6          | (2) | 2   | 224.113  | III        | 9   | (2)    | 4        |            |     |    |        |    |
| 206.38 | II  | 6        | (2, 4)     | 8   | 216.76 | III      | 3          | (1) | 2   | 224.114  | III        | 2   | (1)    | 4        |            |     |    |        |    |

$d$ : Rank of the band structure group  $\{BS\}$

$X_{BS}$ : Symmetry-based indicators of band topology

$\nu_{BS}$ : Set of  $\nu$  bands are symmetry-forbidden from being isolated by band gaps if  $\nu \notin \nu_{BS} \mathbb{Z}$

\*: Exhibiting exceptional filling pattern; see table S8

Table S7. Characterization of the projections of MSGs that correspond to MLG, assuming spinful electrons.

| MSG         | $d$ | $X_{BS}$ | $\nu_{BS}$ | MSG           | $d$ | $X_{BS}$ | $\nu_{BS}$ | MSG           | $d$ | $X_{BS}$ | $\nu_{BS}$ | MSG           | $d$ | $X_{BS}$ | $\nu_{BS}$ |
|-------------|-----|----------|------------|---------------|-----|----------|------------|---------------|-----|----------|------------|---------------|-----|----------|------------|
| 1.1 (1) I   | 1   | (1)      | 1          | 6.19 (1) II   | 1   | (1)      | 2          | 11.52 (1) III | 2   | (1)      | 2          | 16.5 IV       | 1   | (1)      | 4          |
| 1.1 (2) I   | 1   | (1)      | 1          | 6.19 (2) II   | 1   | (1)      | 2          | 11.52 (2) III | 2   | (1)      | 2          | 17.7 (1) I    | 4   | (1)      | 2          |
| 1.1 (3) I   | 1   | (1)      | 1          | 6.19 (3) II   | 1   | (1)      | 2          | 11.53 (1) III | 1   | (1)      | 2          | 17.7 (2) I    | 4   | (1)      | 2          |
| 1.2 (1) II  | 1   | (1)      | 2          | 6.20 (1) III  | 1   | (1)      | 1          | 11.53 (2) III | 1   | (1)      | 2          | 17.8 (1) II   | 1   | (1)      | 4          |
| 1.2 (2) II  | 1   | (1)      | 2          | 6.20 (2) III  | 1   | (1)      | 1          | 11.54 (1) III | 3   | (2)      | 2          | 17.8 (2) II   | 1   | (1)      | 4          |
| 1.2 (3) II  | 1   | (1)      | 2          | 6.20 (3) III  | 1   | (1)      | 1          | 11.54 (2) III | 3   | (2)      | 2          | 17.9 (1) III  | 1   | (1)      | 2          |
| 1.3 (1) IV  | 1   | (1)      | 2          | 6.21 (1) IV   | 1   | (1)      | 2          | 11.55 IV      | 2   | (1)      | 4          | 17.9 (2) III  | 1   | (1)      | 2          |
| 1.3 (2) IV  | 1   | (1)      | 2          | 6.21 (2) IV   | 1   | (1)      | 2          | 11.56 (1) IV  | 3   | (1)      | 2          | 17.10 (1) III | 3   | (2)      | 2          |
| 2.4 (1) I   | 5   | (2)      | 1          | 6.22 (1) IV   | 2   | (1)      | 2          | 11.56 (2) IV  | 3   | (1)      | 2          | 17.10 (2) III | 2   | (1)      | 2          |
| 2.4 (2) I   | 5   | (2)      | 1          | 6.22 (2) IV   | 2   | (1)      | 2          | 11.57 IV      | 2   | (1)      | 4          | 17.11 IV      | 2   | (1)      | 4          |
| 2.4 (3) I   | 5   | (2)      | 1          | 6.23 IV       | 2   | (1)      | 2          | 12.58 I       | 6   | (1)      | 1          | 17.12 (1) IV  | 4   | (1)      | 2          |
| 2.5 (1) II  | 5   | (2)      | 2          | 7.24 (1) I    | 1   | (1)      | 2          | 12.59 II      | 4   | (2)      | 2          | 17.12 (2) IV  | 4   | (1)      | 2          |
| 2.5 (2) II  | 5   | (2)      | 2          | 7.24 (2) I    | 1   | (1)      | 2          | 12.60 III     | 1   | (1)      | 2          | 17.13 IV      | 3   | (1)      | 2          |
| 2.5 (3) II  | 5   | (2)      | 2          | 7.25 (1) II   | 1   | (1)      | 4          | 12.61 III     | 1   | (1)      | 2          | 18.16 I       | 3   | (1)      | 2          |
| 2.6 (1) III | 1   | (1)      | 2          | 7.25 (2) II   | 1   | (1)      | 4          | 12.62 III     | 4   | (2)      | 1          | 18.17 II      | 1   | (1)      | 4          |
| 2.6 (2) III | 1   | (1)      | 2          | 7.26 (1) III  | 1   | (1)      | 2          | 12.64 IV      | 3   | (1)      | 2          | 18.18 III     | 3   | (2)      | 2          |
| 2.6 (3) III | 1   | (1)      | 2          | 7.26 (2) III  | 1   | (1)      | 2          | 13.65 (1) I   | 4   | (1)      | 2          | 18.19 III     | 1   | (1)      | 2          |
| 2.7 (1) IV  | 3   | (1)      | 2          | 7.27 IV       | 1   | (1)      | 4          | 13.65 (2) I   | 5   | (2)      | 2          | 18.20 IV      | 2   | (1)      | 4          |
| 2.7 (2) IV  | 3   | (1)      | 2          | 7.28 (1) IV   | 1   | (1)      | 2          | 13.66 (1) II  | 3   | (2)      | 4          | 18.23 IV      | 3   | (1)      | 2          |
| 3.1 (1) I   | 3   | (1)      | 1          | 7.28 (2) IV   | 1   | (1)      | 2          | 13.66 (2) II  | 3   | (2)      | 4          | 21.38 I       | 2   | (1)      | 2          |
| 3.1 (2) I   | 5   | (2)      | 1          | 7.29 IV       | 1   | (1)      | 4          | 13.67 (1) III | 1   | (1)      | 2          | 21.39 II      | 1   | (1)      | 2          |
| 3.1 (3) I   | 3   | (1)      | 1          | 7.31 IV       | 1   | (1)      | 2          | 13.67 (2) III | 1   | (1)      | 2          | 21.40 III     | 4   | (2)      | 1          |
| 3.2 (1) II  | 1   | (1)      | 2          | 8.32 I        | 2   | (1)      | 1          | 13.68 (1) III | 2   | (1)      | 2          | 21.41 III     | 2   | (1)      | 1          |
| 3.2 (2) II  | 1   | (1)      | 2          | 8.33 II       | 1   | (1)      | 2          | 13.68 (2) III | 3   | (1)      | 2          | 21.43 IV      | 2   | (1)      | 2          |
| 3.2 (3) II  | 1   | (1)      | 2          | 8.34 III      | 1   | (1)      | 1          | 13.69 (1) III | 3   | (2)      | 2          | 25.57 (1) I   | 1   | (1)      | 2          |
| 3.3 (1) III | 1   | (1)      | 1          | 8.36 IV       | 1   | (1)      | 2          | 13.69 (2) III | 3   | (2)      | 2          | 25.57 (2) I   | 1   | (1)      | 2          |
| 3.3 (2) III | 1   | (1)      | 1          | 10.42 (1) I   | 9   | (1)      | 1          | 13.70 IV      | 3   | (1)      | 4          | 25.57 (3) I   | 1   | (1)      | 2          |
| 3.3 (3) III | 1   | (1)      | 1          | 10.42 (2) I   | 10  | (2, 2)   | 1          | 13.71 IV      | 2   | (1)      | 4          | 25.58 (1) II  | 1   | (1)      | 2          |
| 3.4 (1) IV  | 3   | (2)      | 2          | 10.42 (3) I   | 9   | (1)      | 1          | 13.72 (1) IV  | 3   | (1)      | 2          | 25.58 (2) II  | 1   | (1)      | 2          |
| 3.4 (2) IV  | 2   | (1)      | 2          | 10.43 (1) II  | 5   | (2)      | 2          | 13.72 (2) IV  | 3   | (1)      | 2          | 25.58 (3) II  | 1   | (1)      | 2          |
| 3.5 (1) IV  | 1   | (1)      | 2          | 10.43 (2) II  | 5   | (2)      | 2          | 13.73 IV      | 2   | (1)      | 4          | 25.59 (1) III | 3   | (1)      | 1          |
| 3.5 (2) IV  | 1   | (1)      | 2          | 10.43 (3) II  | 5   | (2)      | 2          | 14.75 I       | 3   | (1)      | 2          | 25.59 (2) III | 2   | (1)      | 1          |
| 3.6 IV      | 2   | (1)      | 2          | 10.44 (1) III | 1   | (1)      | 2          | 14.76 II      | 3   | (2)      | 4          | 25.59 (3) III | 3   | (1)      | 1          |
| 4.7 (1) I   | 1   | (1)      | 2          | 10.44 (2) III | 1   | (1)      | 2          | 14.77 III     | 1   | (1)      | 4          | 25.60 (1) III | 3   | (1)      | 1          |
| 4.7 (2) I   | 1   | (1)      | 2          | 10.44 (3) III | 1   | (1)      | 2          | 14.78 III     | 1   | (1)      | 4          | 25.60 (2) III | 3   | (1)      | 1          |
| 4.8 (1) II  | 1   | (1)      | 4          | 10.45 (1) III | 1   | (1)      | 2          | 14.79 III     | 3   | (2)      | 2          | 25.60 (3) III | 5   | (2)      | 1          |
| 4.8 (2) II  | 1   | (1)      | 4          | 10.45 (2) III | 1   | (1)      | 2          | 14.81 IV      | 2   | (1)      | 4          | 25.61 (1) IV  | 1   | (1)      | 4          |
| 4.9 (1) III | 1   | (1)      | 2          | 10.45 (3) III | 1   | (1)      | 2          | 14.82 IV      | 2   | (1)      | 4          | 25.61 (2) IV  | 1   | (1)      | 4          |
| 4.9 (2) III | 1   | (1)      | 2          | 10.46 (1) III | 5   | (2)      | 1          | 14.83 IV      | 3   | (1)      | 2          | 25.62 (1) IV  | 1   | (1)      | 2          |
| 4.10 IV     | 1   | (1)      | 4          | 10.46 (2) III | 5   | (2)      | 1          | 16.1 (1) I    | 1   | (1)      | 2          | 25.62 (2) IV  | 1   | (1)      | 2          |
| 4.11 (1) IV | 1   | (1)      | 2          | 10.46 (3) III | 5   | (2)      | 1          | 16.1 (2) I    | 1   | (1)      | 2          | 25.63 IV      | 1   | (1)      | 4          |
| 4.11 (2) IV | 1   | (1)      | 2          | 10.47 (1) IV  | 5   | (2)      | 2          | 16.1 (3) I    | 1   | (1)      | 2          | 25.64 IV      | 1   | (1)      | 4          |
| 4.12 IV     | 1   | (1)      | 2          | 10.47 (2) IV  | 4   | (1)      | 2          | 16.2 (1) II   | 1   | (1)      | 2          | 26.66 (1) I   | 1   | (1)      | 2          |
| 5.13 I      | 2   | (1)      | 1          | 10.48 (1) IV  | 4   | (1)      | 2          | 16.2 (2) II   | 1   | (1)      | 2          | 26.66 (2) I   | 1   | (1)      | 2          |
| 5.14 II     | 1   | (1)      | 2          | 10.48 (2) IV  | 4   | (1)      | 2          | 16.2 (3) II   | 1   | (1)      | 2          | 26.67 (1) II  | 1   | (1)      | 4          |
| 5.15 III    | 1   | (1)      | 1          | 10.49 IV      | 5   | (1)      | 2          | 16.3 (1) III  | 3   | (1)      | 1          | 26.67 (2) II  | 1   | (1)      | 4          |
| 5.17 IV     | 1   | (1)      | 2          | 11.50 (1) I   | 4   | (1)      | 2          | 16.3 (2) III  | 3   | (1)      | 1          | 26.68 (1) III | 1   | (1)      | 2          |
| 6.18 (1) I  | 3   | (1)      | 1          | 11.50 (2) I   | 4   | (1)      | 2          | 16.3 (3) III  | 5   | (2)      | 1          | 26.68 (2) III | 1   | (1)      | 2          |
| 6.18 (2) I  | 2   | (1)      | 1          | 11.51 (1) II  | 3   | (2)      | 4          | 16.4 (1) IV   | 1   | (1)      | 2          | 26.69 (1) III | 2   | (1)      | 2          |
| 6.18 (3) I  | 3   | (1)      | 1          | 11.51 (2) II  | 3   | (2)      | 4          | 16.4 (2) IV   | 1   | (1)      | 2          | 26.69 (2) III | 3   | (1)      | 2          |

(Continued from the previous page)

|               |         |                |             |                |            |            |            |
|---------------|---------|----------------|-------------|----------------|------------|------------|------------|
| 26.70 (1) III | 1 (1) 2 | 30.118 IV      | 1 (1) 4     | 47.255 IV      | 3 (2) 4    | 51.302 IV  | 3 (2) 4    |
| 26.70 (2) III | 1 (1) 2 | 30.119 IV      | 2 (1) 2     | 49.265 (1) I   | 4 (1) 2    | 51.303 IV  | 3 (1) 4    |
| 26.71 IV      | 1 (1) 4 | 31.123 I       | 2 (1) 2     | 49.265 (2) I   | 4 (1) 2    | 53.321 I   | 6 (1) 2    |
| 26.72 IV      | 1 (1) 4 | 31.124 II      | 1 (1) 4     | 49.266 (1) II  | 3 (2) 4    | 53.322 II  | 3 (2) 4    |
| 26.73 (1) IV  | 1 (1) 2 | 31.125 III     | 1 (1) 2     | 49.266 (2) II  | 3 (2) 4    | 53.323 III | 1 (1) 4    |
| 26.73 (2) IV  | 1 (1) 2 | 31.126 III     | 2 (1) 2     | 49.267 (1) III | 3 (1) 2    | 53.324 III | 2 (1) 4    |
| 26.74 IV      | 1 (1) 2 | 31.127 III     | 1 (1) 2     | 49.267 (2) III | 2 (1) 2    | 53.325 III | 1 (1) 4    |
| 26.75 IV      | 1 (1) 4 | 31.128 IV      | 2 (1) 4     | 49.268 (1) III | 1 (1) 2    | 53.326 III | 3 (1) 2    |
| 27.78 (1) I   | 1 (1) 2 | 31.130 IV      | 1 (1) 4     | 49.268 (2) III | 1 (1) 2    | 53.327 III | 5 (1) 2    |
| 27.78 (2) I   | 1 (1) 2 | 31.132 IV      | 2 (1) 2     | 49.269 (1) III | 6 (1) 2    | 53.328 III | 4 (2) 2    |
| 27.79 (1) II  | 1 (1) 4 | 32.135 I       | 3 (1) 2     | 49.269 (2) III | 6 (1) 2    | 53.329 III | 2 (1) 4    |
| 27.79 (2) II  | 1 (1) 4 | 32.136 II      | 1 (1) 4     | 49.270 (1) III | 4 (1) 2    | 53.330 IV  | 4 (1) 4    |
| 27.80 (1) III | 1 (1) 2 | 32.137 III     | 1 (1) 2     | 49.270 (2) III | 5 (2) 2    | 53.332 IV  | 4 (1) 4    |
| 27.80 (2) III | 1 (1) 2 | 32.138 III     | 3 (2) 2     | 49.271 (1) III | 1 (1) 4    | 53.334 IV  | 5 (1) 2    |
| 27.81 (1) III | 3 (1) 2 | 32.140 IV      | 2 (1) 4     | 49.271 (2) III | 1 (1) 4    | 54.337 I   | 3 (1) 4    |
| 27.81 (2) III | 3 (1) 2 | 32.141 IV      | 3 (1) 2     | 49.272 IV      | 2 (1) 4    | 54.338 II  | 2 (2) 8    |
| 27.82 (1) IV  | 1 (1) 2 | 35.165 I       | 2 (1) 2     | 49.273 (1) IV  | 4 (1) 2    | 54.339 III | 1 (1) 4    |
| 27.82 (2) IV  | 1 (1) 2 | 35.166 II      | 1 (1) 2     | 49.273 (2) IV  | 4 (1) 2    | 54.340 III | 2 (1) 4    |
| 27.83 IV      | 1 (1) 4 | 35.167 III     | 2 (1) 1     | 49.274 IV      | 3 (1) 4    | 54.341 III | 1 (1) 4    |
| 27.85 IV      | 1 (1) 4 | 35.168 III     | 4 (2) 1     | 50.277 I       | 2 (1) 4    | 54.342 III | 3 (1) 4    |
| 28.87 (1) I   | 3 (1) 2 | 35.170 IV      | 2 (1) 2     | 50.278 II      | 2 (2) 4    | 54.343 III | 2 (1) 4    |
| 28.87 (2) I   | 4 (1) 2 | 38.187 I       | 1 (1) 2     | 50.279 III     | 2 (1) 2    | 54.344 III | 3 (2) 4    |
| 28.88 (1) II  | 1 (1) 4 | 38.188 II      | 1 (1) 2     | 50.280 III     | 3 (1) 2    | 54.345 III | 3 (1) 4    |
| 28.88 (2) II  | 1 (1) 4 | 38.189 III     | 2 (1) 1     | 50.281 III     | 4 (2) 2    | 54.346 IV  | 3 (1) 4    |
| 28.89 (1) III | 1 (1) 2 | 38.190 III     | 2 (1) 1     | 50.282 III     | 3 (1) 2    | 54.348 IV  | 2 (1) 4    |
| 28.89 (2) III | 1 (1) 2 | 38.191 III     | 2 (1) 1     | 50.283 III     | 1 (1) 4    | 54.350 IV  | 3 (1) 4    |
| 28.90 (1) III | 2 (1) 2 | 38.193 IV      | 1 (1) 2     | 50.284 IV      | 2 (1) 4    | 55.353 I   | 5 (2) 2    |
| 28.90 (2) III | 2 (1) 2 | 39.195 I       | 1 (1) 2     | 50.287 IV      | 2 (1) 4    | 55.354 II  | 3 (2) 4    |
| 28.91 (1) III | 2 (1) 2 | 39.196 II      | 1 (1) 4     | 51.289 (1) I   | 5 (2) 2    | 55.355 III | 1 (1) 4    |
| 28.91 (2) III | 3 (2) 2 | 39.197 III     | 2 (1) 2     | 51.289 (2) I   | 4 (1) 2    | 55.356 III | 1 (1) 4    |
| 28.92 (1) IV  | 3 (1) 2 | 39.198 III     | 1 (1) 2     | 51.290 (1) II  | 3 (2) 4    | 55.357 III | 6 (2, 2) 2 |
| 28.92 (2) IV  | 4 (1) 2 | 39.199 III     | 2 (1) 2     | 51.290 (2) II  | 3 (2) 4    | 55.358 III | 3 (1) 2    |
| 28.93 IV      | 2 (1) 4 | 39.201 IV      | 1 (1) 2     | 51.291 (1) III | 1 (1) 2    | 55.359 III | 1 (1) 4    |
| 28.94 IV      | 1 (1) 4 | 47.249 (1) I   | 5 (2) 2     | 51.291 (2) III | 1 (1) 2    | 55.360 IV  | 3 (2) 4    |
| 28.96 IV      | 3 (1) 4 | 47.249 (2) I   | 5 (2) 2     | 51.292 (1) III | 2 (1) 2    | 55.363 IV  | 5 (2) 2    |
| 28.97 IV      | 3 (1) 2 | 47.249 (3) I   | 5 (2) 2     | 51.292 (2) III | 2 (1) 2    | 57.377 I   | 3 (1) 4    |
| 29.99 I       | 1 (1) 4 | 47.250 (1) II  | 5 (2) 2     | 51.293 (1) III | 1 (1) 4    | 57.378 II  | 2 (2) 8    |
| 29.100 II     | 1 (1) 8 | 47.250 (2) II  | 5 (2) 2     | 51.293 (2) III | 1 (1) 4    | 57.379 III | 3 (1) 4    |
| 29.101 III    | 1 (1) 4 | 47.250 (3) II  | 5 (2) 2     | 51.294 (1) III | 4 (1) 2    | 57.380 III | 1 (1) 4    |
| 29.102 III    | 1 (1) 4 | 47.251 (1) III | 1 (1) 2     | 51.294 (2) III | 5 (2) 2    | 57.381 III | 1 (1) 4    |
| 29.103 III    | 1 (1) 4 | 47.251 (2) III | 1 (1) 2     | 51.295 (1) III | 4 (1) 2    | 57.382 III | 3 (1) 4    |
| 29.104 IV     | 1 (1) 4 | 47.251 (3) III | 1 (1) 2     | 51.295 (2) III | 4 (1) 2    | 57.383 III | 3 (2) 4    |
| 29.106 IV     | 1 (1) 4 | 47.252 (1) III | 9 (1) 1     | 51.296 (1) III | 6 (2, 2) 2 | 57.384 III | 2 (1) 4    |
| 29.108 IV     | 1 (1) 4 | 47.252 (2) III | 9 (1) 1     | 51.296 (2) III | 6 (1) 2    | 57.385 III | 2 (1) 4    |
| 30.111 I      | 2 (1) 2 | 47.252 (3) III | 10 (2, 2) 1 | 51.297 (1) III | 2 (1) 2    | 57.387 IV  | 2 (1) 4    |
| 30.112 II     | 1 (1) 4 | 47.253 (1) III | 1 (1) 2     | 51.297 (2) III | 3 (1) 2    | 57.388 IV  | 3 (1) 4    |
| 30.113 III    | 1 (1) 2 | 47.253 (2) III | 1 (1) 2     | 51.298 (1) IV  | 5 (2) 2    | 57.389 IV  | 3 (1) 4    |
| 30.114 III    | 1 (1) 2 | 47.253 (3) III | 1 (1) 2     | 51.298 (2) IV  | 4 (1) 2    | 59.405 I   | 2 (1) 4    |
| 30.115 III    | 2 (1) 2 | 47.254 (1) IV  | 3 (2) 4     | 51.299 IV      | 2 (1) 4    | 59.406 II  | 2 (2) 4    |
| 30.117 IV     | 2 (1) 4 | 47.254 (2) IV  | 3 (2) 4     | 51.300 IV      | 3 (2) 4    | 59.407 III | 2 (1) 2    |

(Continued from the previous page)

|        |     |    |        |   |         |     |    |        |   |         |     |    |        |   |         |     |    |        |   |
|--------|-----|----|--------|---|---------|-----|----|--------|---|---------|-----|----|--------|---|---------|-----|----|--------|---|
| 59.408 | III | 1  | (1)    | 4 | 90.97   | III | 2  | (1)    | 2 | 125.363 | I   | 4  | (1)    | 4 | 162.76  | III | 3  | (1)    | 2 |
| 59.409 | III | 4  | (2)    | 2 | 90.98   | III | 5  | (4)    | 2 | 125.364 | II  | 4  | (2)    | 4 | 162.77  | III | 9  | (6)    | 1 |
| 59.410 | III | 3  | (1)    | 2 | 90.99   | III | 1  | (1)    | 4 | 125.365 | III | 4  | (1)    | 2 | 164.85  | I   | 8  | (1)    | 1 |
| 59.411 | III | 3  | (1)    | 2 | 90.101  | IV  | 4  | (1)    | 2 | 125.366 | III | 2  | (1)    | 4 | 164.86  | II  | 6  | (2)    | 2 |
| 59.412 | IV  | 2  | (1)    | 4 | 99.163  | I   | 3  | (1)    | 2 | 125.367 | III | 2  | (1)    | 4 | 164.87  | III | 3  | (1)    | 2 |
| 59.415 | IV  | 2  | (1)    | 4 | 99.164  | II  | 3  | (1)    | 2 | 125.368 | III | 2  | (1)    | 4 | 164.88  | III | 4  | (1)    | 2 |
| 65.481 | I   | 5  | (2)    | 2 | 99.165  | III | 2  | (1)    | 2 | 125.369 | III | 8  | (4)    | 2 | 164.89  | III | 9  | (6)    | 1 |
| 65.482 | II  | 4  | (2)    | 2 | 99.166  | III | 1  | (1)    | 2 | 125.370 | III | 4  | (1)    | 2 | 168.109 | I   | 9  | (6)    | 1 |
| 65.483 | III | 1  | (1)    | 2 | 99.167  | III | 8  | (4)    | 1 | 125.371 | III | 2  | (1)    | 4 | 168.110 | II  | 4  | (1)    | 2 |
| 65.484 | III | 1  | (1)    | 2 | 99.169  | IV  | 2  | (1)    | 4 | 125.373 | IV  | 4  | (1)    | 4 | 168.111 | III | 4  | (1)    | 1 |
| 65.485 | III | 8  | (2, 2) | 1 | 100.171 | I   | 4  | (1)    | 2 | 127.387 | I   | 8  | (4)    | 2 | 174.133 | I   | 14 | (3, 3) | 1 |
| 65.486 | III | 6  | (1)    | 1 | 100.172 | II  | 2  | (1)    | 4 | 127.388 | II  | 5  | (4)    | 4 | 174.134 | II  | 7  | (3)    | 2 |
| 65.487 | III | 1  | (1)    | 2 | 100.173 | III | 1  | (1)    | 4 | 127.389 | III | 2  | (1)    | 4 | 174.135 | III | 4  | (1)    | 1 |
| 65.489 | IV  | 4  | (2)    | 2 | 100.174 | III | 2  | (1)    | 2 | 127.390 | III | 3  | (2)    | 4 | 175.137 | I   | 18 | (6, 6) | 1 |
| 67.501 | I   | 3  | (1)    | 2 | 100.175 | III | 5  | (4)    | 2 | 127.391 | III | 4  | (2)    | 2 | 175.138 | II  | 9  | (6)    | 2 |
| 67.502 | II  | 3  | (2)    | 4 | 100.177 | IV  | 4  | (1)    | 2 | 127.392 | III | 2  | (1)    | 4 | 175.139 | III | 7  | (3)    | 2 |
| 67.503 | III | 1  | (1)    | 2 | 111.251 | I   | 3  | (1)    | 2 | 127.393 | III | 10 | (4, 4) | 2 | 175.140 | III | 4  | (1)    | 2 |
| 67.504 | III | 2  | (1)    | 2 | 111.252 | II  | 3  | (1)    | 2 | 127.394 | III | 2  | (1)    | 4 | 175.141 | III | 6  | (2)    | 1 |
| 67.505 | III | 5  | (2)    | 2 | 111.253 | III | 2  | (1)    | 2 | 127.395 | III | 2  | (1)    | 4 | 177.149 | I   | 4  | (1)    | 2 |
| 67.506 | III | 5  | (1)    | 2 | 111.254 | III | 1  | (1)    | 2 | 127.397 | IV  | 8  | (4)    | 2 | 177.150 | II  | 4  | (1)    | 2 |
| 67.507 | III | 2  | (1)    | 2 | 111.255 | III | 8  | (4)    | 1 | 129.411 | I   | 4  | (1)    | 4 | 177.151 | III | 4  | (1)    | 1 |
| 67.509 | IV  | 3  | (1)    | 2 | 111.257 | IV  | 2  | (1)    | 4 | 129.412 | II  | 4  | (2)    | 4 | 177.152 | III | 5  | (1)    | 1 |
| 75.1   | I   | 8  | (4)    | 1 | 113.267 | I   | 4  | (1)    | 2 | 129.413 | III | 2  | (1)    | 4 | 177.153 | III | 9  | (6)    | 1 |
| 75.2   | II  | 3  | (1)    | 2 | 113.268 | II  | 2  | (1)    | 4 | 129.414 | III | 2  | (1)    | 4 | 183.185 | I   | 4  | (1)    | 2 |
| 75.3   | III | 2  | (1)    | 2 | 113.269 | III | 1  | (1)    | 4 | 129.415 | III | 2  | (1)    | 4 | 183.186 | II  | 4  | (1)    | 2 |
| 75.5   | IV  | 4  | (2)    | 2 | 113.270 | III | 2  | (1)    | 2 | 129.416 | III | 4  | (1)    | 2 | 183.187 | III | 5  | (1)    | 1 |
| 81.33  | I   | 8  | (4)    | 1 | 113.271 | III | 5  | (4)    | 2 | 129.417 | III | 8  | (4)    | 2 | 183.188 | III | 4  | (1)    | 1 |
| 81.34  | II  | 3  | (1)    | 2 | 113.273 | IV  | 4  | (1)    | 2 | 129.418 | III | 2  | (1)    | 4 | 183.189 | III | 9  | (6)    | 1 |
| 81.35  | III | 2  | (1)    | 2 | 115.283 | I   | 3  | (1)    | 2 | 129.419 | III | 4  | (1)    | 2 | 187.209 | I   | 7  | (3)    | 2 |
| 81.37  | IV  | 4  | (2)    | 2 | 115.284 | II  | 3  | (1)    | 2 | 129.421 | IV  | 4  | (1)    | 4 | 187.210 | II  | 7  | (3)    | 2 |
| 83.43  | I   | 16 | (4, 4) | 1 | 115.285 | III | 2  | (1)    | 2 | 143.1   | I   | 7  | (3)    | 1 | 187.211 | III | 5  | (1)    | 1 |
| 83.44  | II  | 8  | (4)    | 2 | 115.286 | III | 1  | (1)    | 2 | 143.2   | II  | 4  | (1)    | 2 | 187.212 | III | 5  | (1)    | 1 |
| 83.45  | III | 5  | (2)    | 2 | 115.287 | III | 8  | (4)    | 1 | 147.13  | I   | 9  | (6)    | 1 | 187.213 | III | 14 | (3, 3) | 1 |
| 83.46  | III | 3  | (1)    | 2 | 115.289 | IV  | 2  | (1)    | 4 | 147.14  | II  | 6  | (2)    | 2 | 189.221 | I   | 7  | (3)    | 2 |
| 83.47  | III | 3  | (1)    | 2 | 117.299 | I   | 4  | (1)    | 2 | 147.15  | III | 4  | (1)    | 2 | 189.222 | II  | 5  | (3)    | 2 |
| 83.49  | IV  | 8  | (4)    | 2 | 117.300 | II  | 2  | (1)    | 4 | 149.21  | I   | 5  | (1)    | 1 | 189.223 | III | 4  | (1)    | 1 |
| 85.59  | I   | 8  | (4)    | 2 | 117.301 | III | 1  | (1)    | 4 | 149.22  | II  | 4  | (1)    | 2 | 189.224 | III | 4  | (1)    | 1 |
| 85.60  | II  | 4  | (2)    | 4 | 117.302 | III | 2  | (1)    | 2 | 149.23  | III | 7  | (3)    | 1 | 189.225 | III | 10 | (3, 3) | 1 |
| 85.61  | III | 2  | (1)    | 4 | 117.303 | III | 5  | (4)    | 2 | 150.25  | I   | 5  | (1)    | 1 | 191.233 | I   | 9  | (6)    | 2 |
| 85.62  | III | 4  | (1)    | 2 | 117.305 | IV  | 4  | (1)    | 2 | 150.26  | II  | 3  | (1)    | 2 | 191.234 | II  | 9  | (6)    | 2 |
| 85.63  | III | 4  | (1)    | 2 | 123.339 | I   | 8  | (4)    | 2 | 150.27  | III | 5  | (3)    | 1 | 191.235 | III | 4  | (1)    | 2 |
| 85.65  | IV  | 4  | (1)    | 4 | 123.340 | II  | 8  | (4)    | 2 | 156.49  | I   | 5  | (1)    | 1 | 191.236 | III | 7  | (3)    | 2 |
| 89.87  | I   | 3  | (1)    | 2 | 123.341 | III | 3  | (1)    | 2 | 156.50  | II  | 4  | (1)    | 2 | 191.237 | III | 5  | (3)    | 2 |
| 89.88  | II  | 3  | (1)    | 2 | 123.342 | III | 5  | (2)    | 2 | 156.51  | III | 7  | (3)    | 1 | 191.238 | III | 8  | (1)    | 1 |
| 89.89  | III | 1  | (1)    | 2 | 123.343 | III | 4  | (2)    | 2 | 157.53  | I   | 5  | (1)    | 1 | 191.239 | III | 8  | (1)    | 1 |
| 89.90  | III | 8  | (4)    | 1 | 123.344 | III | 3  | (1)    | 2 | 157.54  | II  | 3  | (1)    | 2 | 191.240 | III | 18 | (6, 6) | 1 |
| 89.91  | III | 2  | (1)    | 2 | 123.345 | III | 16 | (4, 4) | 1 | 157.55  | III | 5  | (3)    | 1 | 191.241 | III | 4  | (1)    | 2 |
| 89.93  | IV  | 2  | (1)    | 4 | 123.346 | III | 3  | (1)    | 2 | 162.73  | I   | 8  | (1)    | 1 |         |     |    |        |   |
| 90.95  | I   | 4  | (1)    | 2 | 123.347 | III | 3  | (1)    | 2 | 162.74  | II  | 6  | (2)    | 2 |         |     |    |        |   |
| 90.96  | II  | 2  | (1)    | 4 | 123.349 | IV  | 5  | (4)    | 4 | 162.75  | III | 4  | (1)    | 2 |         |     |    |        |   |

 $d$ : Rank of the band structure group  $\{\text{BS}\}$  $X_{\text{BS}}$ : Symmetry-based indicators of band topology $\nu_{\text{BS}}$ : Set of  $\nu$  bands can only be isolated by band gaps if  $\nu \in \nu_{\text{BS}} \mathbb{Z}$



Table S8. MSGs for which spinful electrons exhibit exceptional filling patterns.

| MSG    | $\{\nu\}_{\text{AI}}$ | $\{\nu\}_{\text{BS}}$         | MSG           | $\{\nu\}_{\text{AI}}$ | $\{\nu\}_{\text{BS}}$ | MSG                           | $\{\nu\}_{\text{AI}}$ | $\{\nu\}_{\text{BS}}$ | MSG | $\{\nu\}_{\text{AI}}$                | $\{\nu\}_{\text{BS}}$         |         |     |                               |               |
|--------|-----------------------|-------------------------------|---------------|-----------------------|-----------------------|-------------------------------|-----------------------|-----------------------|-----|--------------------------------------|-------------------------------|---------|-----|-------------------------------|---------------|
| 196.6  | IV                    | $2\mathbb{N} \setminus \{2\}$ | $2\mathbb{N}$ | 209.51                | IV                    | $2\mathbb{N} \setminus \{2\}$ | $2\mathbb{N}$         | 219.88                | IV  | $2\mathbb{N} \setminus \{2\}$        | $2\mathbb{N}$                 | 228.134 | I   | $4\mathbb{N} \setminus \{4\}$ | $4\mathbb{N}$ |
| 198.11 | IV                    | $4\mathbb{N} \setminus \{4\}$ | $4\mathbb{N}$ | 210.55                | IV                    | $4\mathbb{N} \setminus \{4\}$ | $4\mathbb{N}$         | 220.89                | I   | $2\mathbb{N} \setminus \{2, 4, 10\}$ | $2\mathbb{N} \setminus \{2\}$ | 228.136 | III | $4\mathbb{N} \setminus \{4\}$ | $4\mathbb{N}$ |
| 199.12 | I                     | $2\mathbb{N} \setminus \{2\}$ | –             | 212.62                | IV                    | $4\mathbb{N} \setminus \{4\}$ | $4\mathbb{N}$         | 220.90                | II  | $4\mathbb{N} \setminus \{4, 8, 20\}$ | $4\mathbb{N} \setminus \{4\}$ | 228.139 | IV  | $4\mathbb{N} \setminus \{4\}$ | $4\mathbb{N}$ |
| 199.13 | II                    | $4\mathbb{N} \setminus \{4\}$ | $4\mathbb{N}$ | 213.66                | IV                    | $4\mathbb{N} \setminus \{4\}$ | $4\mathbb{N}$         | 220.91                | III | $4\mathbb{N} \setminus \{4\}$        | –                             | 230.145 | I   | $4\mathbb{N} \setminus \{4\}$ | $4\mathbb{N}$ |
| 202.25 | IV                    | $2\mathbb{N} \setminus \{2\}$ | $2\mathbb{N}$ | 214.68                | II                    | $4\mathbb{N} \setminus \{4\}$ | $4\mathbb{N}$         | 223.106               | III | $2\mathbb{N} \setminus \{2\}$        | $2\mathbb{N}$                 | 230.146 | II  | $8\mathbb{N} \setminus \{8\}$ | $8\mathbb{N}$ |
| 203.29 | IV                    | $4\mathbb{N} \setminus \{4\}$ | $4\mathbb{N}$ | 214.69                | III                   | $2\mathbb{N} \setminus \{2\}$ | –                     | 226.122               | I   | $2\mathbb{N} \setminus \{2\}$        | $2\mathbb{N}$                 | 230.147 | III | $4\mathbb{N} \setminus \{4\}$ | –             |
| 206.39 | III                   | $4\mathbb{N} \setminus \{4\}$ | –             | 218.81                | I                     | $2\mathbb{N} \setminus \{2\}$ | $2\mathbb{N}$         | 226.124               | III | $2\mathbb{N} \setminus \{2\}$        | $2\mathbb{N}$                 | 230.148 | III | $4\mathbb{N} \setminus \{4\}$ | –             |
| 208.46 | III                   | $2\mathbb{N} \setminus \{2\}$ | $2\mathbb{N}$ | 219.85                | I                     | $2\mathbb{N} \setminus \{2\}$ | $2\mathbb{N}$         | 226.127               | IV  | $2\mathbb{N} \setminus \{2\}$        | $2\mathbb{N}$                 |         |     |                               |               |

$\mathbb{N}$ : The set of natural numbers

$\{\nu\}_{\text{AI}}$ : Set of fillings for which physical atomic insulators are possible

$\{\nu\}_{\text{BS}}$ : Set of fillings for which physical band structure are possible; a dash (–) indicates  $\{\nu\}_{\text{BS}} = \{\nu\}_{\text{AI}}$  for that MSG

## Section S2. feSMs in stoichiometric compounds

While the electron filling  $\nu$  of a physical system can, in principle, take any real value upon doping, in perfectly ordered stoichiometric crystals the realizable fillings are further constrained by crystalline symmetries. As the atoms in such a crystal form  $\mathcal{M}$ -symmetric lattices, the allowed fillings for an MSG  $\mathcal{M}$  are determined by the multiplicities of the Wyckoff positions [33]. Mathematically, this is captured by demanding  $\nu \in \nu_P \mathbb{N}$ , where  $\nu_P$  is the gcd of the multiplicities of the Wyckoff positions and  $\mathbb{N}$  denotes the set of natural number. Whenever  $\nu_P < \nu_{BS}$ , one can find systems with a filling  $\nu$  that is incompatible with a band gap, and therefore  $\mathcal{M}$  admits feSMs. We also remark that for the four ‘Wyckoff-mismatched’ SGs identified in Ref. [9], as well as their magnetic descendants, the set of physically realizable filling does not take the simple form of  $\nu_P \mathbb{N}$ . The exhaustive list of such Wyckoff-mismatched MSGs can be found in table S19, since the set physically realizable fillings coincides with the  $\{\nu\}_{AI}$  of *spinless* fermions.

For TR symmetric systems described by the 230 type II MSGs,  $\nu_P < \nu_{BS}$  holds generally, and the filling criterion for filling-enforced (semi-)metals simplifies into whether or not the filling is an odd multiple of  $\nu_P$ . For a general MSG, however,  $\nu_P \leq \nu_{BS}$ , and to identify magnetic settings which can host filling-enforced (semi-)metals one must first isolate the list of MSGs where  $\nu_P \neq \nu_{BS}$ . This is easily achieved using our theory, and we found that 647 out of the 1651 MSGs can host filling-enforced (semi-)metals (this includes the 230 type II MSGs, i.e., there are 417 intrinsically magnetic MSGs). For all these MSGs,  $\nu_{BS} = 2\nu_P$ , and therefore gaplessness near the Fermi energy is enforced whenever the filling of the system is an odd multiple of  $\nu_P$ .

Some of these MSGs, however, are still incompatible with feSMs due to ‘band-sticking.’ For instance, whenever the MSG contains the combination of spatial inversion and TR as a symmetry, each band is doubly degenerate. For such MSGs, if  $\nu_P$  is also odd, the filling-enforced gaplessness always manifests in the form of a large Fermi-surface enclosing half of the Brillouin zone, resulting in a conventional metal. A similar situation arise for band-sticking along high-symmetry line. We refer to such systems as filling-enforced metals. We found that 226 of the identified MSGs fall into this category, and they are listed in table S11.

This leaves behind 421 MSGs, 250 of which are intrinsically magnetic, which can potentially host feSMs. Among them, we further characterize their minimal fermiology into two types. If the irrep dimensions at any high-symmetry point is incompatible with a band gap at filling  $\nu_P$ , the fermi surface of the feSM consists of pinned nodal points. These MSGs are tabulated in table S9. If all the high-symmetry momenta can be in principle gapped, then the semimetallic behavior must be enforced by a more intricate band connectivity, resulting in nodal features that are movable, but irremovable. (Such fermiology is exemplified by that of simple nonsymmorphic SGs, as discussed in, e.g., Ref. [5].) These MSGs are tabulated in table S10. Note that these are not mutually exclusive char-

acterization of feSMs — certain MSGs in table S9 can also display such movable nodal features.

Lastly, we also include results specific to TR-symmetric systems (type II MSGs) in table S12, which describes the effect of spin-orbit coupling on the fermiology of the feSMs.

Table S9. MSGs that can host feSMs with nodal-point Fermi surfaces pinned at high-symmetry momenta.

| MSG    | $\nu_P$ | FS  | MSG     | $\nu_P$ | FS  | MSG     | $\nu_P$ | FS  | MSG     | $\nu_P$ | FS  | MSG     | $\nu_P$ | FS  | MSG     | $\nu_P$ | FS  |
|--------|---------|-----|---------|---------|-----|---------|---------|-----|---------|---------|-----|---------|---------|-----|---------|---------|-----|
| 1.2    | II      | 1 2 | 59.415  | IV      | 2 4 | 100.173 | III     | 2 4 | 125.366 | III     | 2 4 | 139.540 | IV      | 2 4 | 195.3   | IV      | 2 4 |
| 3.2    | II      | 1 2 | 63.468  | IV      | 2 4 | 101.180 | II      | 2 4 | 125.368 | III     | 2 4 | 140.542 | II      | 2 4 | 196.4   | I       | 1 2 |
| 5.14   | II      | 1 2 | 66.492  | II      | 2 4 | 101.181 | III     | 2 4 | 125.371 | III     | 2 4 | 140.544 | III     | 2 4 | 196.5   | II      | 1 2 |
| 6.19   | II      | 1 2 | 66.497  | III     | 2 4 | 101.184 | IV      | 2 4 | 125.374 | IV      | 4 8 | 140.546 | III     | 2 4 | 197.7   | I       | 1 2 |
| 8.33   | II      | 1 2 | 67.502  | II      | 2 4 | 102.188 | II      | 2 4 | 126.375 | I       | 2 4 | 140.549 | III     | 2 4 | 197.8   | II      | 1 2 |
| 11.51  | II      | 2 4 | 68.512  | II      | 2 4 | 102.189 | III     | 2 4 | 126.376 | II      | 2 4 | 141.551 | I       | 2 4 | 201.19  | II      | 2 4 |
| 11.57  | IV      | 2 4 | 68.517  | III     | 2 4 | 102.194 | IV      | 2 4 | 126.378 | III     | 2 4 | 141.552 | II      | 2 4 | 201.20  | III     | 2 4 |
| 13.66  | II      | 2 4 | 68.520  | IV      | 2 4 | 103.196 | II      | 2 4 | 126.379 | III     | 2 4 | 141.555 | III     | 2 4 | 203.27  | II      | 2 4 |
| 13.73  | IV      | 2 4 | 70.528  | II      | 2 4 | 103.197 | III     | 2 4 | 126.380 | III     | 2 4 | 141.558 | III     | 2 4 | 203.28  | III     | 2 4 |
| 14.76  | II      | 2 4 | 70.531  | III     | 2 4 | 103.198 | III     | 2 4 | 126.382 | III     | 2 4 | 141.559 | III     | 2 4 | 207.40  | I       | 1 2 |
| 15.86  | II      | 2 4 | 71.538  | IV      | 2 4 | 104.204 | II      | 2 4 | 126.383 | III     | 2 4 | 143.2   | II      | 1 2 | 207.41  | II      | 1 2 |
| 16.1   | I       | 1 2 | 72.540  | II      | 2 4 | 104.205 | III     | 2 4 | 126.385 | IV      | 4 8 | 144.5   | II      | 3 2 | 207.42  | III     | 1 2 |
| 16.2   | II      | 1 2 | 72.545  | III     | 2 4 | 104.206 | III     | 2 4 | 127.392 | III     | 2 4 | 145.8   | II      | 3 2 | 207.43  | IV      | 2 4 |
| 16.5   | IV      | 2 4 | 74.555  | II      | 2 4 | 105.212 | II      | 2 4 | 127.395 | III     | 2 4 | 146.11  | II      | 1 2 | 208.47  | IV      | 2 4 |
| 16.6   | IV      | 2 4 | 75.2    | II      | 1 2 | 105.214 | III     | 2 4 | 128.403 | III     | 2 4 | 149.22  | II      | 1 2 | 209.48  | I       | 1 2 |
| 18.17  | II      | 2 4 | 75.3    | III     | 1 2 | 105.216 | IV      | 2 4 | 128.404 | III     | 2 4 | 150.26  | II      | 1 2 | 209.49  | II      | 1 2 |
| 21.38  | I       | 1 2 | 79.26   | II      | 1 2 | 105.218 | IV      | 2 4 | 128.407 | III     | 2 4 | 151.30  | II      | 3 2 | 209.50  | III     | 1 2 |
| 21.39  | II      | 1 2 | 79.27   | III     | 1 2 | 107.232 | IV      | 2 4 | 129.411 | I       | 2 4 | 152.34  | II      | 3 2 | 211.56  | I       | 1 2 |
| 22.45  | I       | 1 2 | 84.52   | II      | 2 4 | 108.234 | II      | 2 4 | 129.420 | IV      | 4 8 | 153.38  | II      | 3 2 | 211.57  | II      | 1 2 |
| 22.46  | II      | 1 2 | 84.56   | IV      | 2 4 | 108.235 | III     | 2 4 | 129.421 | IV      | 2 4 | 154.42  | II      | 3 2 | 211.58  | III     | 1 2 |
| 23.49  | I       | 1 2 | 84.58   | IV      | 2 4 | 109.240 | II      | 2 4 | 130.424 | II      | 4 8 | 155.46  | II      | 1 2 | 218.82  | II      | 2 4 |
| 23.50  | II      | 1 2 | 85.60   | II      | 2 4 | 109.242 | III     | 2 4 | 131.435 | I       | 2 4 | 156.50  | II      | 1 2 | 218.83  | III     | 2 4 |
| 25.61  | IV      | 2 4 | 85.65   | IV      | 2 4 | 111.256 | IV      | 2 4 | 131.436 | II      | 2 4 | 157.54  | II      | 1 2 | 220.90  | II      | 2 4 |
| 25.63  | IV      | 2 4 | 85.66   | IV      | 2 4 | 112.260 | II      | 2 4 | 131.439 | III     | 2 4 | 160.66  | II      | 1 2 | 220.91  | III     | 2 4 |
| 25.64  | IV      | 2 4 | 86.68   | II      | 2 4 | 112.262 | III     | 2 4 | 131.442 | III     | 2 4 | 163.80  | II      | 2 4 | 222.98  | I       | 2 4 |
| 25.65  | IV      | 2 4 | 86.74   | IV      | 2 4 | 113.274 | IV      | 2 4 | 131.443 | III     | 2 4 | 165.92  | II      | 2 4 | 222.99  | II      | 2 4 |
| 26.67  | II      | 2 4 | 88.82   | II      | 2 4 | 114.278 | III     | 2 4 | 131.445 | IV      | 4 8 | 167.104 | II      | 2 4 | 222.100 | III     | 2 4 |
| 27.79  | II      | 2 4 | 89.87   | I       | 1 2 | 115.288 | IV      | 2 4 | 132.447 | I       | 2 4 | 168.110 | II      | 1 2 | 222.101 | III     | 2 4 |
| 30.112 | II      | 2 4 | 89.88   | II      | 1 2 | 115.289 | IV      | 2 4 | 132.448 | II      | 2 4 | 171.122 | II      | 3 2 | 222.102 | III     | 2 4 |
| 31.124 | II      | 2 4 | 89.89   | III     | 1 2 | 115.290 | IV      | 2 4 | 132.450 | III     | 2 4 | 172.126 | II      | 3 2 | 223.104 | I       | 2 4 |
| 32.136 | II      | 2 4 | 89.91   | III     | 1 2 | 116.292 | II      | 2 4 | 132.452 | III     | 2 4 | 174.134 | II      | 1 2 | 223.105 | II      | 2 4 |
| 34.157 | II      | 2 4 | 89.93   | IV      | 2 4 | 116.293 | III     | 2 4 | 132.455 | III     | 2 4 | 176.144 | II      | 2 4 | 223.107 | III     | 2 4 |
| 35.169 | IV      | 2 4 | 89.94   | IV      | 2 4 | 117.300 | II      | 2 4 | 132.458 | IV      | 4 8 | 177.149 | I       | 1 2 | 223.108 | III     | 2 4 |
| 35.171 | IV      | 2 4 | 90.96   | II      | 2 4 | 117.301 | III     | 2 4 | 134.471 | I       | 2 4 | 177.150 | II      | 1 2 | 224.110 | I       | 2 4 |
| 36.173 | II      | 2 4 | 90.99   | III     | 2 4 | 118.308 | II      | 2 4 | 134.472 | II      | 2 4 | 180.167 | I       | 3 2 | 224.111 | II      | 2 4 |
| 37.181 | II      | 2 4 | 93.126  | IV      | 2 4 | 118.309 | III     | 2 4 | 134.474 | III     | 2 4 | 180.168 | II      | 3 2 | 224.112 | III     | 2 4 |
| 43.225 | II      | 2 4 | 94.128  | II      | 2 4 | 122.334 | II      | 2 4 | 134.476 | III     | 2 4 | 181.173 | I       | 3 2 | 224.114 | III     | 2 4 |
| 48.258 | II      | 2 4 | 94.131  | III     | 2 4 | 122.336 | III     | 2 4 | 134.479 | III     | 2 4 | 181.174 | II      | 3 2 | 225.121 | IV      | 2 4 |
| 48.261 | III     | 2 4 | 97.151  | I       | 1 2 | 124.352 | II      | 2 4 | 135.484 | II      | 4 8 | 183.190 | IV      | 2 4 | 226.123 | II      | 2 4 |
| 49.266 | II      | 2 4 | 97.152  | II      | 1 2 | 124.354 | III     | 2 4 | 136.495 | I       | 2 4 | 184.192 | II      | 2 4 | 226.125 | III     | 2 4 |
| 49.271 | III     | 2 4 | 97.153  | III     | 1 2 | 124.355 | III     | 2 4 | 136.500 | III     | 2 4 | 185.198 | II      | 2 4 | 226.126 | III     | 2 4 |
| 50.278 | II      | 2 4 | 97.155  | III     | 1 2 | 124.356 | III     | 2 4 | 136.503 | III     | 2 4 | 186.204 | II      | 2 4 | 227.128 | I       | 2 4 |
| 50.283 | III     | 2 4 | 99.168  | IV      | 2 4 | 124.358 | III     | 2 4 | 136.504 | IV      | 4 8 | 192.244 | II      | 2 4 | 227.129 | II      | 2 4 |
| 53.329 | III     | 2 4 | 99.169  | IV      | 2 4 | 124.359 | III     | 2 4 | 137.507 | I       | 2 4 | 192.251 | III     | 2 4 | 227.130 | III     | 2 4 |
| 55.359 | III     | 2 4 | 99.170  | IV      | 2 4 | 125.363 | I       | 2 4 | 137.511 | III     | 2 4 | 195.1   | I       | 1 2 | 227.132 | III     | 2 4 |
| 58.399 | III     | 2 4 | 100.172 | II      | 2 4 | 125.364 | II      | 2 4 | 137.515 | III     | 2 4 | 195.2   | II      | 1 2 |         |         |     |

$\nu_P$ : The physically achievable fillings are quantized in units of  $\nu_P$

FS: Dimension of the irrep(s) dissected by the Fermi energy when the physical filling is an odd-integer-multiple of  $\nu_P$

Table S10. MSGs that can host feSMs with movable nodal Fermi surfaces.

| MSG    | $\nu_P$ | MSG | $\nu_P$ | MSG | $\nu_P$ | MSG     | $\nu_P$ | MSG | $\nu_P$ | MSG | $\nu_P$ |         |     |   |         |     |   |
|--------|---------|-----|---------|-----|---------|---------|---------|-----|---------|-----|---------|---------|-----|---|---------|-----|---|
| 4.8    | II      | 2   | 53.325  | III | 2       | 77.16   | IV      | 2   | 102.192 | IV  | 4       | 138.520 | II  | 4 | 206.38  | II  | 4 |
| 7.25   | II      | 2   | 54.338  | II  | 4       | 77.18   | IV      | 2   | 105.211 | I   | 2       | 138.530 | IV  | 4 | 208.44  | I   | 2 |
| 9.38   | II      | 2   | 54.349  | IV  | 4       | 78.20   | II      | 4   | 105.217 | IV  | 4       | 141.553 | III | 2 | 208.45  | II  | 2 |
| 14.77  | III     | 2   | 56.366  | II  | 4       | 80.30   | II      | 2   | 106.220 | II  | 4       | 141.554 | III | 2 | 210.52  | I   | 2 |
| 14.78  | III     | 2   | 57.378  | II  | 4       | 84.54   | III     | 2   | 109.239 | I   | 2       | 141.560 | IV  | 4 | 210.53  | II  | 2 |
| 17.8   | II      | 2   | 57.390  | IV  | 4       | 85.61   | III     | 2   | 109.244 | IV  | 4       | 142.562 | II  | 4 | 210.54  | III | 2 |
| 19.26  | II      | 4   | 59.405  | I   | 2       | 86.69   | III     | 2   | 110.246 | II  | 4       | 142.564 | III | 4 | 212.60  | II  | 4 |
| 20.32  | II      | 2   | 59.413  | IV  | 4       | 86.70   | III     | 2   | 119.320 | IV  | 2       | 142.569 | III | 4 | 213.64  | II  | 4 |
| 24.54  | II      | 2   | 59.414  | IV  | 4       | 88.83   | III     | 2   | 120.322 | II  | 2       | 158.58  | II  | 2 | 214.67  | I   | 2 |
| 28.88  | II      | 2   | 60.418  | II  | 4       | 88.84   | III     | 2   | 120.323 | III | 2       | 159.62  | II  | 2 | 214.68  | II  | 2 |
| 29.100 | II      | 4   | 60.429  | IV  | 4       | 91.104  | II      | 4   | 122.335 | III | 2       | 161.70  | II  | 2 | 216.77  | IV  | 2 |
| 33.145 | II      | 4   | 61.434  | II  | 4       | 92.112  | II      | 4   | 125.367 | III | 2       | 169.114 | II  | 6 | 219.86  | II  | 2 |
| 38.194 | IV      | 2   | 61.435  | III | 4       | 93.119  | I       | 2   | 129.415 | III | 2       | 170.118 | II  | 6 | 219.87  | III | 2 |
| 39.196 | II      | 2   | 61.437  | III | 4       | 93.120  | II      | 2   | 130.426 | III | 4       | 173.130 | II  | 2 | 224.113 | III | 2 |
| 40.204 | II      | 2   | 62.442  | II  | 4       | 93.124  | IV      | 2   | 131.437 | III | 2       | 178.156 | II  | 6 | 227.131 | III | 2 |
| 41.212 | II      | 2   | 62.455  | IV  | 4       | 94.127  | I       | 2   | 132.449 | III | 2       | 179.162 | II  | 6 | 227.133 | IV  | 4 |
| 44.233 | IV      | 2   | 64.471  | III | 2       | 94.134  | IV      | 2   | 133.460 | II  | 4       | 182.180 | II  | 2 | 228.135 | II  | 4 |
| 45.236 | II      | 2   | 64.473  | III | 2       | 95.136  | II      | 4   | 133.467 | III | 4       | 188.216 | II  | 2 | 228.137 | III | 4 |
| 46.242 | II      | 2   | 64.477  | III | 2       | 96.144  | II      | 4   | 133.470 | IV  | 4       | 190.228 | II  | 2 | 228.138 | III | 4 |
| 48.257 | I       | 2   | 68.511  | I   | 2       | 98.157  | I       | 2   | 134.473 | III | 2       | 198.10  | II  | 4 | 230.146 | II  | 4 |
| 50.277 | I       | 2   | 70.527  | I   | 2       | 98.158  | II      | 2   | 134.475 | III | 2       | 199.13  | II  | 2 | 230.149 | III | 4 |
| 50.286 | IV      | 4   | 73.549  | II  | 4       | 98.161  | III     | 2   | 134.480 | IV  | 4       | 201.18  | I   | 2 |         |     |   |
| 50.288 | IV      | 4   | 74.557  | III | 2       | 101.179 | I       | 2   | 135.491 | III | 4       | 203.26  | I   | 2 |         |     |   |
| 52.306 | II      | 4   | 76.8    | II  | 4       | 101.186 | IV      | 4   | 137.516 | IV  | 4       | 205.34  | II  | 4 |         |     |   |
| 53.323 | III     | 2   | 77.14   | II  | 2       | 102.187 | I       | 2   | 137.517 | IV  | 4       | 205.35  | III | 4 |         |     |   |

$\nu_P$ : The physically achievable fillings are quantized in units of  $\nu_P$

Table S11. MSGs that can host filling-enforced metals.

| MSG    | $\nu_P$ | Deg | MSG    | $\nu_P$ | Deg | MSG     | $\nu_P$ | Deg | MSG     | $\nu_P$ | Deg | MSG     | $\nu_P$ | Deg | MSG     | $\nu_P$ | Deg |
|--------|---------|-----|--------|---------|-----|---------|---------|-----|---------|---------|-----|---------|---------|-----|---------|---------|-----|
| 2.5    | II      | 1 3 | 59.406 | II      | 2 1 | 99.166  | III     | 1 1 | 123.350 | IV      | 2 1 | 147.14  | II      | 1 3 | 202.22  | I       | 1 1 |
| 2.6    | III     | 1 3 | 59.408 | III     | 2 1 | 107.227 | I       | 1 1 | 125.373 | IV      | 2 1 | 147.15  | III     | 1 3 | 202.23  | II      | 1 3 |
| 10.43  | II      | 1 3 | 59.416 | IV      | 2 1 | 107.228 | II      | 1 1 | 126.386 | IV      | 2 1 | 148.18  | II      | 1 3 | 202.24  | III     | 1 3 |
| 10.44  | III     | 1 3 | 63.458 | II      | 2 1 | 107.229 | III     | 1 1 | 127.388 | II      | 2 1 | 148.19  | III     | 1 3 | 204.30  | I       | 1 1 |
| 10.45  | III     | 1 3 | 63.460 | III     | 2 1 | 107.230 | III     | 1 1 | 127.389 | III     | 2 1 | 162.74  | II      | 1 3 | 204.31  | II      | 1 3 |
| 12.59  | II      | 1 3 | 64.470 | II      | 2 1 | 111.251 | I       | 1 1 | 127.390 | III     | 2 1 | 162.75  | III     | 1 3 | 204.32  | III     | 1 3 |
| 12.60  | III     | 1 3 | 64.472 | III     | 2 1 | 111.252 | II      | 1 1 | 127.394 | III     | 2 1 | 162.76  | III     | 1 3 | 215.70  | I       | 1 1 |
| 12.61  | III     | 1 3 | 65.481 | I       | 1 1 | 111.253 | III     | 1 1 | 128.400 | II      | 2 1 | 164.86  | II      | 1 3 | 215.71  | II      | 1 1 |
| 25.57  | I       | 1 1 | 65.482 | II      | 1 3 | 111.254 | III     | 1 1 | 128.401 | III     | 2 1 | 164.87  | III     | 1 3 | 215.72  | III     | 1 1 |
| 25.58  | II      | 1 1 | 65.483 | III     | 1 3 | 111.257 | IV      | 2 1 | 128.402 | III     | 2 1 | 164.88  | III     | 1 3 | 215.73  | IV      | 2 1 |
| 35.165 | I       | 1 1 | 65.484 | III     | 1 3 | 111.258 | IV      | 2 1 | 128.406 | III     | 2 1 | 166.98  | II      | 1 3 | 216.74  | I       | 1 1 |
| 35.166 | II      | 1 1 | 65.487 | III     | 1 3 | 112.266 | IV      | 2 1 | 129.412 | II      | 2 1 | 166.99  | III     | 1 3 | 216.75  | II      | 1 1 |
| 38.187 | I       | 1 1 | 65.488 | IV      | 2 1 | 113.268 | II      | 2 1 | 129.413 | III     | 2 1 | 166.100 | III     | 1 3 | 216.76  | III     | 1 1 |
| 38.188 | II      | 1 1 | 65.490 | IV      | 2 1 | 113.269 | III     | 2 1 | 129.414 | III     | 2 1 | 175.138 | II      | 1 3 | 217.78  | I       | 1 1 |
| 42.219 | I       | 1 1 | 67.510 | IV      | 2 1 | 114.276 | II      | 2 1 | 129.418 | III     | 2 1 | 175.139 | III     | 1 3 | 217.79  | II      | 1 1 |
| 42.220 | II      | 1 1 | 69.521 | I       | 1 1 | 114.277 | III     | 2 1 | 129.422 | IV      | 2 1 | 175.140 | III     | 1 3 | 217.80  | III     | 1 1 |
| 44.229 | I       | 1 1 | 69.522 | II      | 1 3 | 115.283 | I       | 1 1 | 131.444 | IV      | 2 1 | 183.185 | I       | 1 1 | 218.84  | IV      | 2 1 |
| 44.230 | II      | 1 1 | 69.523 | III     | 1 3 | 115.284 | II      | 1 1 | 131.446 | IV      | 2 1 | 183.186 | II      | 1 1 | 221.92  | I       | 1 1 |
| 47.249 | I       | 1 1 | 69.525 | III     | 1 3 | 115.285 | III     | 1 1 | 132.456 | IV      | 2 1 | 187.209 | I       | 1 1 | 221.93  | II      | 1 3 |
| 47.250 | II      | 1 3 | 71.533 | I       | 1 1 | 115.286 | III     | 1 1 | 134.482 | IV      | 2 1 | 187.210 | II      | 1 1 | 221.94  | III     | 1 3 |
| 47.251 | III     | 1 3 | 71.534 | II      | 1 3 | 119.315 | I       | 1 1 | 136.496 | II      | 2 1 | 189.221 | I       | 1 1 | 221.95  | III     | 1 1 |
| 47.253 | III     | 1 3 | 71.535 | III     | 1 3 | 119.316 | II      | 1 1 | 136.497 | III     | 2 1 | 189.222 | II      | 1 1 | 221.96  | III     | 1 3 |
| 47.254 | IV      | 2 1 | 71.537 | III     | 1 3 | 119.317 | III     | 1 1 | 136.498 | III     | 2 1 | 191.233 | I       | 1 1 | 221.97  | IV      | 2 1 |
| 47.255 | IV      | 2 1 | 81.34  | II      | 1 1 | 119.318 | III     | 1 1 | 136.502 | III     | 2 1 | 191.234 | II      | 1 3 | 222.103 | IV      | 2 1 |
| 47.256 | IV      | 2 1 | 81.35  | III     | 1 1 | 121.327 | I       | 1 1 | 136.506 | IV      | 2 1 | 191.235 | III     | 1 3 | 223.109 | IV      | 2 1 |
| 48.264 | IV      | 2 1 | 82.40  | II      | 1 1 | 121.328 | II      | 1 1 | 137.508 | II      | 2 1 | 191.236 | III     | 1 3 | 224.115 | IV      | 2 1 |
| 50.287 | IV      | 2 1 | 82.41  | III     | 1 1 | 121.329 | III     | 1 1 | 137.509 | III     | 2 1 | 191.237 | III     | 1 3 | 225.116 | I       | 1 1 |
| 51.290 | II      | 2 1 | 83.44  | II      | 1 3 | 121.330 | III     | 1 1 | 137.510 | III     | 2 1 | 191.241 | III     | 1 3 | 225.117 | II      | 1 3 |
| 51.293 | III     | 2 1 | 83.45  | III     | 1 1 | 123.339 | I       | 1 1 | 137.514 | III     | 2 1 | 191.242 | IV      | 2 1 | 225.118 | III     | 1 3 |
| 51.302 | IV      | 2 1 | 83.46  | III     | 1 3 | 123.340 | II      | 1 3 | 137.518 | IV      | 2 1 | 193.254 | II      | 2 1 | 225.119 | III     | 1 1 |
| 53.322 | II      | 2 1 | 83.47  | III     | 1 3 | 123.341 | III     | 1 3 | 139.531 | I       | 1 1 | 193.256 | III     | 2 1 | 225.120 | III     | 1 3 |
| 53.324 | III     | 2 1 | 87.76  | II      | 1 3 | 123.342 | III     | 1 1 | 139.532 | II      | 1 3 | 194.264 | II      | 2 1 | 229.140 | I       | 1 1 |
| 55.354 | II      | 2 1 | 87.77  | III     | 1 1 | 123.343 | III     | 1 1 | 139.533 | III     | 1 3 | 194.267 | III     | 2 1 | 229.141 | II      | 1 3 |
| 55.355 | III     | 2 1 | 87.78  | III     | 1 3 | 123.344 | III     | 1 3 | 139.534 | III     | 1 1 | 200.14  | I       | 1 1 | 229.142 | III     | 1 3 |
| 55.356 | III     | 2 1 | 87.79  | III     | 1 3 | 123.346 | III     | 1 3 | 139.535 | III     | 1 1 | 200.15  | II      | 1 3 | 229.143 | III     | 1 1 |
| 58.394 | II      | 2 1 | 99.163 | I       | 1 1 | 123.347 | III     | 1 3 | 139.536 | III     | 1 3 | 200.16  | III     | 1 3 | 229.144 | III     | 1 3 |
| 58.395 | III     | 2 1 | 99.164 | II      | 1 1 | 123.348 | IV      | 2 1 | 139.538 | III     | 1 3 | 200.17  | IV      | 2 1 |         |         |     |
| 58.396 | III     | 2 1 | 99.165 | III     | 1 1 | 123.349 | IV      | 2 1 | 139.539 | III     | 1 3 | 201.21  | IV      | 2 1 |         |         |     |

$\nu_P$ : The physically achievable fillings are quantized in units of  $\nu_P$

Deg: Dimension of the manifold on which band sticking occurs, which enforces metallic behavior at fillings which are odd-integer multiples of  $\nu_P$

Table S12. Effect of turning on spin-orbit coupling on the fermiology of TR-symmetric filling-enforced (semi)metals.

| SG | $\nu_P$ | FS                    | SG | $\nu_P$ | FS                    | SG  | $\nu_P$ | FS                    | SG  | $\nu_P$ | FS                    | SG  | $\nu_P$ | FS                    | SG  | $\nu_P$ | FS                    |
|----|---------|-----------------------|----|---------|-----------------------|-----|---------|-----------------------|-----|---------|-----------------------|-----|---------|-----------------------|-----|---------|-----------------------|
| 1  | 1       | $M_3 \rightarrow p$   | 40 | 2       | $M_1 \rightarrow m$   | 79  | 1       | $M_3 \rightarrow p$   | 118 | 2       | $M_1 \rightarrow p$   | 157 | 1       | $M_3 \rightarrow p$   | 196 | 1       | $M_3 \rightarrow p$   |
| 2  | 1       | $M_3 \rightarrow M_3$ | 41 | 2       | $M_1 \rightarrow m$   | 80  | 2       | $p \rightarrow m$     | 119 | 1       | $M_3 \rightarrow M_1$ | 158 | 2       | $M_1 \rightarrow m$   | 197 | 1       | $M_3 \rightarrow p$   |
| 3  | 1       | $M_3 \rightarrow p$   | 42 | 1       | $M_3 \rightarrow M_1$ | 81  | 1       | $M_3 \rightarrow M_1$ | 120 | 2       | $M_1 \rightarrow m$   | 159 | 2       | $M_1 \rightarrow m$   | 198 | 4       | $p \rightarrow m$     |
| 4  | 2       | $M_2 \rightarrow m$   | 43 | 2       | $M_1 \rightarrow p$   | 82  | 1       | $M_3 \rightarrow M_1$ | 121 | 1       | $M_3 \rightarrow M_1$ | 160 | 1       | $M_3 \rightarrow p$   | 199 | 2       | $p \rightarrow m$     |
| 5  | 1       | $M_3 \rightarrow p$   | 44 | 1       | $M_3 \rightarrow M_1$ | 83  | 1       | $M_3 \rightarrow M_3$ | 122 | 2       | $M_1 \rightarrow p$   | 161 | 2       | $M_1 \rightarrow m$   | 200 | 1       | $M_3 \rightarrow M_3$ |
| 6  | 1       | $M_3 \rightarrow p$   | 45 | 2       | $M_1 \rightarrow m$   | 84  | 2       | $p \rightarrow p$     | 123 | 1       | $M_3 \rightarrow M_3$ | 162 | 1       | $M_3 \rightarrow M_3$ | 201 | 2       | $M_1 \rightarrow p$   |
| 7  | 2       | $M_1 \rightarrow m$   | 46 | 2       | $M_1 \rightarrow m$   | 85  | 2       | $M_1 \rightarrow p$   | 124 | 2       | $M_1 \rightarrow p$   | 163 | 2       | $M_1 \rightarrow p$   | 202 | 1       | $M_3 \rightarrow M_3$ |
| 8  | 1       | $M_3 \rightarrow p$   | 47 | 1       | $M_3 \rightarrow M_3$ | 86  | 2       | $M_1 \rightarrow p$   | 125 | 2       | $M_1 \rightarrow p$   | 164 | 1       | $M_3 \rightarrow M_3$ | 203 | 2       | $M_1 \rightarrow p$   |
| 9  | 2       | $M_1 \rightarrow m$   | 48 | 2       | $M_1 \rightarrow p$   | 87  | 1       | $M_3 \rightarrow M_3$ | 126 | 2       | $M_1 \rightarrow p$   | 165 | 2       | $M_1 \rightarrow p$   | 204 | 1       | $M_3 \rightarrow M_3$ |
| 10 | 1       | $M_3 \rightarrow M_3$ | 49 | 2       | $M_1 \rightarrow p$   | 88  | 2       | $M_1 \rightarrow p$   | 127 | 2       | $M_2 \rightarrow M_1$ | 166 | 1       | $M_3 \rightarrow M_3$ | 205 | 4       | $M_1 \rightarrow m$   |
| 11 | 2       | $M_2 \rightarrow p$   | 50 | 2       | $M_1 \rightarrow p$   | 89  | 1       | $M_3 \rightarrow p$   | 128 | 2       | $M_2 \rightarrow M_1$ | 167 | 2       | $M_1 \rightarrow p$   | 206 | 4       | $p \rightarrow m$     |
| 12 | 1       | $M_3 \rightarrow M_3$ | 51 | 2       | $M_2 \rightarrow M_1$ | 90  | 2       | $M_2 \rightarrow p$   | 129 | 2       | $M_2 \rightarrow M_1$ | 168 | 1       | $M_3 \rightarrow p$   | 207 | 1       | $M_3 \rightarrow p$   |
| 13 | 2       | $M_1 \rightarrow p$   | 52 | 4       | $p \rightarrow m$     | 91  | 4       | $m \rightarrow m$     | 130 | 4       | $p \rightarrow p$     | 169 | 6       | $M_2 \rightarrow m$   | 208 | 2       | $m \rightarrow m$     |
| 14 | 2       | $M_2 \rightarrow p$   | 53 | 2       | $M_2 \rightarrow M_1$ | 92  | 4       | $p \rightarrow m$     | 131 | 2       | $M_1 \rightarrow p$   | 170 | 6       | $M_2 \rightarrow m$   | 209 | 1       | $M_3 \rightarrow p$   |
| 15 | 2       | $M_1 \rightarrow p$   | 54 | 4       | $p \rightarrow m$     | 93  | 2       | $m \rightarrow m$     | 132 | 2       | $M_1 \rightarrow p$   | 171 | 3       | $M_3 \rightarrow p$   | 210 | 2       | $p \rightarrow m$     |
| 16 | 1       | $M_3 \rightarrow p$   | 55 | 2       | $M_2 \rightarrow M_1$ | 94  | 2       | $M_2 \rightarrow p$   | 133 | 4       | $m \rightarrow m$     | 172 | 3       | $M_3 \rightarrow p$   | 211 | 1       | $M_3 \rightarrow p$   |
| 17 | 2       | $M_2 \rightarrow m$   | 56 | 4       | $p \rightarrow m$     | 95  | 4       | $m \rightarrow m$     | 134 | 2       | $M_1 \rightarrow p$   | 173 | 2       | $M_2 \rightarrow m$   | 212 | 4       | $p \rightarrow m$     |
| 18 | 2       | $M_2 \rightarrow p$   | 57 | 4       | $M_1 \rightarrow m$   | 96  | 4       | $p \rightarrow m$     | 135 | 4       | $p \rightarrow p$     | 174 | 1       | $M_3 \rightarrow p$   | 213 | 4       | $p \rightarrow m$     |
| 19 | 4       | $p \rightarrow m$     | 58 | 2       | $M_2 \rightarrow M_1$ | 97  | 1       | $M_3 \rightarrow p$   | 136 | 2       | $M_2 \rightarrow M_1$ | 175 | 1       | $M_3 \rightarrow M_3$ | 214 | 2       | $p \rightarrow m$     |
| 20 | 2       | $M_2 \rightarrow m$   | 59 | 2       | $M_2 \rightarrow M_1$ | 98  | 2       | $p \rightarrow m$     | 137 | 2       | $M_2 \rightarrow M_1$ | 176 | 2       | $M_2 \rightarrow p$   | 215 | 1       | $M_3 \rightarrow M_1$ |
| 21 | 1       | $M_3 \rightarrow p$   | 60 | 4       | $M_1 \rightarrow m$   | 99  | 1       | $M_3 \rightarrow M_1$ | 138 | 4       | $p \rightarrow m$     | 177 | 1       | $M_3 \rightarrow p$   | 216 | 1       | $M_3 \rightarrow M_1$ |
| 22 | 1       | $M_3 \rightarrow p$   | 61 | 4       | $M_1 \rightarrow m$   | 100 | 2       | $M_1 \rightarrow p$   | 139 | 1       | $M_3 \rightarrow M_3$ | 178 | 6       | $M_2 \rightarrow m$   | 217 | 1       | $M_3 \rightarrow M_1$ |
| 23 | 1       | $M_3 \rightarrow p$   | 62 | 4       | $M_1 \rightarrow m$   | 101 | 2       | $M_1 \rightarrow p$   | 140 | 2       | $M_1 \rightarrow p$   | 179 | 6       | $M_2 \rightarrow m$   | 218 | 2       | $M_1 \rightarrow p$   |
| 24 | 2       | $p \rightarrow m$     | 63 | 2       | $M_2 \rightarrow M_1$ | 102 | 2       | $M_1 \rightarrow p$   | 141 | 2       | $M_1 \rightarrow p$   | 180 | 3       | $M_3 \rightarrow p$   | 219 | 2       | $M_1 \rightarrow m$   |
| 25 | 1       | $M_3 \rightarrow M_1$ | 64 | 2       | $M_2 \rightarrow M_1$ | 103 | 2       | $M_1 \rightarrow p$   | 142 | 4       | $p \rightarrow m$     | 181 | 3       | $M_3 \rightarrow p$   | 220 | 2       | $M_1 \rightarrow p$   |
| 26 | 2       | $M_2 \rightarrow p$   | 65 | 1       | $M_3 \rightarrow M_3$ | 104 | 2       | $M_1 \rightarrow p$   | 143 | 1       | $M_3 \rightarrow p$   | 182 | 2       | $M_2 \rightarrow m$   | 221 | 1       | $M_3 \rightarrow M_3$ |
| 27 | 2       | $M_1 \rightarrow p$   | 66 | 2       | $M_1 \rightarrow p$   | 105 | 2       | $M_1 \rightarrow p$   | 144 | 3       | $M_3 \rightarrow p$   | 183 | 1       | $M_3 \rightarrow M_1$ | 222 | 2       | $M_1 \rightarrow p$   |
| 28 | 2       | $M_1 \rightarrow m$   | 67 | 2       | $M_1 \rightarrow p$   | 106 | 4       | $m \rightarrow m$     | 145 | 3       | $M_3 \rightarrow p$   | 184 | 2       | $M_1 \rightarrow p$   | 223 | 2       | $M_1 \rightarrow p$   |
| 29 | 4       | $p \rightarrow m$     | 68 | 2       | $M_1 \rightarrow p$   | 107 | 1       | $M_3 \rightarrow M_1$ | 146 | 1       | $M_3 \rightarrow p$   | 185 | 2       | $M_2 \rightarrow p$   | 224 | 2       | $M_1 \rightarrow p$   |
| 30 | 2       | $M_1 \rightarrow p$   | 69 | 1       | $M_3 \rightarrow M_3$ | 108 | 2       | $M_1 \rightarrow p$   | 147 | 1       | $M_3 \rightarrow M_3$ | 186 | 2       | $M_2 \rightarrow p$   | 225 | 1       | $M_3 \rightarrow M_3$ |
| 31 | 2       | $M_2 \rightarrow p$   | 70 | 2       | $M_1 \rightarrow p$   | 109 | 2       | $M_1 \rightarrow p$   | 148 | 1       | $M_3 \rightarrow M_3$ | 187 | 1       | $M_3 \rightarrow M_1$ | 226 | 2       | $M_1 \rightarrow p$   |
| 32 | 2       | $M_1 \rightarrow p$   | 71 | 1       | $M_3 \rightarrow M_3$ | 110 | 4       | $p \rightarrow m$     | 149 | 1       | $M_3 \rightarrow p$   | 188 | 2       | $M_1 \rightarrow m$   | 227 | 2       | $M_1 \rightarrow p$   |
| 33 | 4       | $p \rightarrow m$     | 72 | 2       | $M_1 \rightarrow p$   | 111 | 1       | $M_3 \rightarrow M_1$ | 150 | 1       | $M_3 \rightarrow p$   | 189 | 1       | $M_3 \rightarrow M_1$ | 228 | 4       | $p \rightarrow m$     |
| 34 | 2       | $M_1 \rightarrow p$   | 73 | 4       | $p \rightarrow m$     | 112 | 2       | $M_1 \rightarrow p$   | 151 | 3       | $M_3 \rightarrow p$   | 190 | 2       | $M_1 \rightarrow m$   | 229 | 1       | $M_3 \rightarrow M_3$ |
| 35 | 1       | $M_3 \rightarrow M_1$ | 74 | 2       | $M_1 \rightarrow p$   | 113 | 2       | $M_2 \rightarrow M_1$ | 152 | 3       | $M_3 \rightarrow p$   | 191 | 1       | $M_3 \rightarrow M_3$ | 230 | 4       | $p \rightarrow m$     |
| 36 | 2       | $M_2 \rightarrow p$   | 75 | 1       | $M_3 \rightarrow p$   | 114 | 2       | $M_2 \rightarrow M_1$ | 153 | 3       | $M_3 \rightarrow p$   | 192 | 2       | $M_1 \rightarrow p$   |     |         |                       |
| 37 | 2       | $M_1 \rightarrow p$   | 76 | 4       | $m \rightarrow m$     | 115 | 1       | $M_3 \rightarrow M_1$ | 154 | 3       | $M_3 \rightarrow p$   | 193 | 2       | $M_2 \rightarrow M_1$ |     |         |                       |
| 38 | 1       | $M_3 \rightarrow M_1$ | 77 | 2       | $m \rightarrow m$     | 116 | 2       | $M_1 \rightarrow p$   | 155 | 1       | $M_3 \rightarrow p$   | 194 | 2       | $M_2 \rightarrow M_1$ |     |         |                       |
| 39 | 2       | $M_1 \rightarrow m$   | 78 | 4       | $m \rightarrow m$     | 117 | 2       | $M_1 \rightarrow p$   | 156 | 1       | $M_3 \rightarrow p$   | 195 | 1       | $M_3 \rightarrow p$   |     |         |                       |

SG: Space group describing the spatial symmetry of a material with time-reversal symmetry

$\nu_P$ : The physically achievable fillings are quantized in units of  $\nu_P$

FS: Fermiology for a material with a filling being an odd-integer multiple of  $\nu_P$ , dubbed a filling-enforced (semi-)metal

$M_d$ : Filling-enforced metals due to band sticking on  $d$ -dimensional manifolds

$p$ : Filling-enforced semimetals with pinned, nodal-point Fermi surfaces

$m$ : Filling-enforced semimetals with movable nodal Fermi surfaces

### Section S3. Notations

For a MSG  $\mathcal{M} = \mathcal{G} + \mathcal{A}$ ,  $g \in \mathcal{G}$  maps the position  $\mathbf{x}$  and the momentum  $\mathbf{k}$  to

$$g(\mathbf{x}) \equiv p_g \mathbf{x} + \mathbf{t}_g, \quad g(\mathbf{k}) \equiv p_g(\mathbf{k}), \quad p_g \in O(3), \quad (1)$$

while  $a \in \mathcal{A}$  acts on them as

$$a(\mathbf{x}) = p_a \mathbf{x} + \mathbf{t}_a, \quad a(\mathbf{k}) = -p_a \mathbf{k}, \quad p_a \in O(3). \quad (2)$$

The little group of  $\mathbf{k}$  is defined by

$$\mathcal{M}_{\mathbf{k}} = \{m \in \mathcal{M} \mid m(\mathbf{k}) = \mathbf{k}\} = \mathcal{G}_{\mathbf{k}} + \mathcal{A}_{\mathbf{k}}, \quad (3)$$

where  $\mathcal{G}_{\mathbf{k}}$  is the unitary part and  $\mathcal{A}_{\mathbf{k}}$  is the anti-unitary part:

$$\mathcal{G}_{\mathbf{k}} = \{g \in \mathcal{G} \mid g(\mathbf{k}) = \mathbf{k} + \mathbf{G}\}, \quad (4)$$

$$\mathcal{A}_{\mathbf{k}} = \{a \in \mathcal{A} \mid a(\mathbf{k}) = \mathbf{k} + \mathbf{G}\} \quad (5)$$

and  $\mathbf{G}$  is a reciprocal lattice vector.  $\mathcal{G}_{\mathbf{k}}$  is a subgroup of  $\mathcal{M}_{\mathbf{k}}$  but  $\mathcal{A}_{\mathbf{k}}$  is not even a group.

Similarly, the site symmetry group of  $\mathbf{x}$  is defined by

$$\mathcal{M}_{\mathbf{x}} = \{m \in \mathcal{G} \mid m(\mathbf{x}) = \mathbf{x}\} = \mathcal{G}_{\mathbf{x}} + \mathcal{A}_{\mathbf{x}}. \quad (6)$$

where  $\mathcal{G}_{\mathbf{x}}$  is the unitary part and  $\mathcal{A}_{\mathbf{x}}$  is the anti-unitary part:

$$\mathcal{G}_{\mathbf{x}} = \{g \in \mathcal{G} \mid g(\mathbf{x}) = \mathbf{x}\}, \quad (7)$$

$$\mathcal{A}_{\mathbf{x}} = \{a \in \mathcal{A} \mid a(\mathbf{x}) = \mathbf{x}\}. \quad (8)$$

Since we are interested in systems of spinful electrons with spin-orbit coupling, we assume a projective representation, i.e.,

$$u(g)u(g') = z_{g,g'}u(gg'), \quad (9)$$

$$u(g)u(a') = z_{g,a'}u(ga'), \quad (10)$$

$$u(a)u(g')^* = z_{a,g'}u(ag'), \quad (11)$$

$$u(a)u(a')^* = z_{a,a'}u(aa'). \quad (12)$$

For example,  $z_{\mathcal{T},\mathcal{T}} = -1$  for the time-reversal symmetry  $\mathcal{T}$ . For spinless electrons, all  $z$  should be set to be unity in the following discussions.

### Section S4. Compatibility relations

Here we review the compatibility relations among the integers  $\mathbf{n} = \{n_{\mathbf{k}}^{\alpha}\}$  to be consistent with  $\mathcal{M} = \mathcal{G} + \mathcal{A}$ .

#### A. Basics

Suppose that  $\{|\mathbf{k}, i\rangle\}$  is a basis of an irrep  $u_{\mathbf{k}}^{\alpha}$  of  $\mathcal{G}_{\mathbf{k}}$ , i.e.,

$$\hat{h}|\mathbf{k}, i\rangle = |\mathbf{k}, j\rangle[u_{\mathbf{k}}^{\alpha}(h)]_{ji}, \quad h \in \mathcal{G}_{\mathbf{k}}. \quad (13)$$

Here we show that  $\{\hat{g}|\mathbf{k}, i\rangle\}$  ( $g \in \mathcal{G}$ ) forms a basis of the irrep

$$u_{g(\mathbf{k})}^{\alpha'}(h') \equiv \rho_{h',g}u_{\mathbf{k}}^{\alpha}(g^{-1}h'g), \quad h' \in \mathcal{G}_{g(\mathbf{k})}. \quad (14)$$

Here,  $\rho_{h,g}$  is related to the projective factor  $z_{g,g'} = \pm 1$  as

$$\rho_{h,g} = \frac{z_{h,g}}{z_{g,g^{-1}hg}} = \pm 1. \quad (15)$$

To see this, note that  $h' \in \mathcal{G}_{g(\mathbf{k})}$  can be written as  $h' = ghg^{-1}$  using  $h \in \mathcal{G}_{\mathbf{k}}$ . Then,

$$\begin{aligned} \hat{h}'(\hat{g}|\mathbf{k}, i) &= z_{h',g}(h'g)|\mathbf{k}, i\rangle \\ &= z_{h',g}(\hat{g}h)|\mathbf{k}, i\rangle = \frac{z_{h',g}}{z_{g,h}}\hat{g}(\hat{h}|\mathbf{k}, i) \\ &= \rho_{h',g}\hat{g}(|\mathbf{k}, j\rangle)[u_{\mathbf{k}}^{\alpha}(h)]_{ji} \\ &= (\hat{g}|\mathbf{k}, j)\rho_{h',g}[u_{\mathbf{k}}^{\alpha}(g^{-1}h'g)]_{ji}. \end{aligned} \quad (16)$$

Similarly,  $\{\hat{a}|\mathbf{k}, i\rangle\}$  ( $a \in \mathcal{A}$ ) forms a basis of the irrep

$$u_{a(\mathbf{k})}^{\alpha'}(h') \equiv \rho_{h',a}[u_{\mathbf{k}}^{\alpha}(a^{-1}h'a)]_{ji}^*, \quad h' \in \mathcal{G}_{a(\mathbf{k})}. \quad (17)$$

where

$$\rho_{h,a} = \frac{z_{h,a}}{z_{a,a^{-1}ha}} = \pm 1. \quad (18)$$

Again writing  $h' \in \mathcal{G}_{a(\mathbf{k})}$  as  $h' = aha^{-1}$  using  $h \in \mathcal{G}_{\mathbf{k}}$ ,

$$\begin{aligned} \hat{h}'(\hat{a}|\mathbf{k}, i) &= z_{h',a}(h'a)|\mathbf{k}, i\rangle \\ &= z_{h',a}(\hat{a}h)|\mathbf{k}, i\rangle = \frac{z_{h',a}}{z_{a,h}}\hat{a}(\hat{h}|\mathbf{k}, i) \\ &= \rho_{h',a}\hat{a}(|\mathbf{k}, j\rangle)[u_{\mathbf{k}}^{\alpha}(h)]_{ji} \\ &= (\hat{a}|\mathbf{k}, j)\rho_{h',a}[u_{\mathbf{k}}^{\alpha}(a^{-1}h'a)]_{ji}^*. \end{aligned} \quad (19)$$

#### B. Compatibility relations from the unitary part $\mathcal{C}_{\mathcal{G}}$

Here we summarize the compatibility relations arising from the unitary part  $\mathcal{G}$  of  $\mathcal{M}$ . There are three major categories:

(i) The representations used at symmetry-related momenta are related to each other. Suppose that an irrep  $u_{\mathbf{k}}^{\alpha}$  of  $\mathcal{G}_{\mathbf{k}}$  is used  $n_{\mathbf{k}}^{\alpha}$  times. When  $g \notin \mathcal{G}_{\mathbf{k}}$ ,  $\mathbf{k}$  and  $g(\mathbf{k})$  are symmetry-related but distinct momenta. Let  $\{|\mathbf{k}, i\rangle\}$  be the basis of the representation. As explained above, the  $g$ -transformed copy,  $\{\hat{g}|\mathbf{k}, i\rangle\}$  forms a basis of the irrep  $u_{g(\mathbf{k})}^{\alpha'}$  in Eq. (13). It implies

$$n_{g(\mathbf{k})}^{\alpha'} = n_{\mathbf{k}}^{\alpha}. \quad (20)$$

(ii) At a high-symmetry momenta slightly off from a higher-symmetry point  $\mathbf{k}$ , the continuity of the band structure requires that

$$n_{\mathbf{k}+\delta(\mathbf{k})}^{\beta} = \sum_{\alpha} n_{\mathbf{k}}^{\alpha} m^{\alpha\beta}, \quad (21)$$

where nonnegative integers  $m^{\alpha\beta}$  are the coefficients appearing in the decomposition  $u_{\mathbf{k}}^{\alpha} = \sum_{\beta} c^{\alpha\beta} u_{\mathbf{k}+\delta(\mathbf{k})}^{\beta}$  regarding  $u_{\mathbf{k}}^{\alpha}$  as a representation of  $\mathcal{G}_{\mathbf{k}+\delta(\mathbf{k})} < \mathcal{G}_{\mathbf{k}}$ .

(iii) For nonsymmorphic operations  $g$  with a ‘fractional translation’, such as glide reflections or screw rotations,

$$\sum_{\alpha} n_{\mathbf{k}}^{\alpha} \text{tr } u_{\mathbf{k}}^{\alpha}(g) = 0, \quad (22)$$

again due to the continuity of the band structure.

### C. Compatibility relations from the anti-unitary part $\tilde{\mathcal{C}}_{\mathcal{A}}$

The anti-unitary part  $\mathcal{A}$  adds two more constraints.

(iv)  $\mathcal{A}$  may relate two momenta that were not related by  $\mathcal{G}$ . This occurs when the anti-unitary part  $\mathcal{A}_{\mathbf{k}}$  is empty. Suppose that an irrep  $u_{\mathbf{k}}^{\alpha}$  of  $\mathcal{G}_{\mathbf{k}}$  is used  $n_{\mathbf{k}}^{\alpha}$  times. Let  $\{|\mathbf{k}, i\rangle\}$  be the basis of the representation. The  $a$ -transformed copy,  $\{\hat{a}|\mathbf{k}, i\rangle\}$  forms a basis of the irrep  $u_{a(\mathbf{k})}^{\alpha'}$  in Eq. (17). It requires a constraint

$$n_{a(\mathbf{k})}^{\alpha'} = n_{\mathbf{k}}^{\alpha}. \quad (23)$$

(v) When the anti-unitary part  $\mathcal{A}_{\mathbf{k}}$  is not empty,  $u_{a(\mathbf{k})}^{\alpha'}$  in Eq. (17) is also an irrep at  $\mathbf{k}$  if  $a \in \mathcal{A}_{\mathbf{k}}$ . The nature of pairing due to  $\mathcal{A}_{\mathbf{k}}$  can be judged by the Herring rule [2]:

$$\xi_{\mathbf{k}}^{\alpha} = \frac{1}{|\mathcal{A}_{\mathbf{k}}/T|} \sum_{a \in \mathcal{A}_{\mathbf{k}}/T} \delta_{a(\mathbf{k}), \mathbf{k}} z_{a,a} \chi_{\mathbf{k}}^{\alpha}(a^2), \quad (24)$$

where  $\chi_{\mathbf{k}}^{\alpha}(h) \equiv \text{tr } u_{\mathbf{k}}^{\alpha}(h)$  is the character of the irrep. When  $\xi_{\mathbf{k}}^{\alpha} = 0$ ,  $u_{\mathbf{k}}^{\alpha'}$  and  $u_{\mathbf{k}}^{\alpha}$  are inequivalent and  $n_{\mathbf{k}}^{\alpha'} = n_{\mathbf{k}}^{\alpha}$  ( $\alpha' \neq \alpha$ ) is required. When  $\xi_{\mathbf{k}}^{\alpha} = -1$  or  $+1$ ,  $u_{\mathbf{k}}^{\alpha'}$  and  $u_{\mathbf{k}}^{\alpha}$  are equivalent ( $\alpha' = \alpha$ ). When  $\xi_{\mathbf{k}}^{\alpha} = -1$ ,  $\{\hat{a}|\mathbf{k}, i\rangle\}$  and  $\{|\mathbf{k}, i\rangle\}$  are orthogonal to each other and  $n_{\mathbf{k}}^{\alpha}$  must be an even integer. When  $\xi_{\mathbf{k}}^{\alpha} = +1$ ,  $\{\hat{a}|\mathbf{k}, i\rangle\}$  and  $\{|\mathbf{k}, i\rangle\}$  are linearly dependent and there is no extra constraint on  $n_{\mathbf{k}}^{\alpha}$ .

### Section S5. Details of AIs

As explained in the main text, an AI can be specified by choosing the position  $\mathbf{x}$  in real space at which electrons are localized and the type of orbital on the site. The type of orbital is a (co-)representation of the site symmetry group  $\mathcal{M}_{\mathbf{x}}$  in Eq. (6).

Let  $u_{\mathbf{x}}^r$  ( $r = 1, 2, \dots$ ) be an irrep of  $\mathcal{G}_{\mathbf{x}}$ . When  $\mathcal{A}_{\mathbf{x}}$  is empty,  $u_{\mathbf{x}}^r$  is already an irrep of  $\mathcal{M}_{\mathbf{x}}$ . We put an orbital  $u_{\mathbf{x}}^r$  on the site  $\mathbf{x}$ . One can construct an AI by placing a symmetry-related copy on each site of an  $\mathcal{M}$ -symmetric lattice  $\mathcal{M}\mathbf{x} \equiv \{m\mathbf{x} | m \in \mathcal{M}\}$ . In this case the lattice  $\mathcal{M}\mathbf{x}$  contains twice as many number of site as  $\mathcal{G}\mathbf{x}$ .

On the other hand, when  $\mathcal{A}_{\mathbf{x}}$  is not empty,  $\mathcal{A}_{\mathbf{x}}$  dictates a certain pairing among  $u_{\mathbf{x}}^r$ 's, leading to a co-irrep of  $\mathcal{M}_{\mathbf{x}}$ . The details of pairing can be again judged by the Herring rule [2]:

$$\xi_{\mathbf{x}}^r = \frac{1}{|\mathcal{A}_{\mathbf{x}}|} \sum_{a \in \mathcal{A}_{\mathbf{x}}} z_{a,a} \chi_{\mathbf{x}}^r(a^2). \quad (25)$$

When  $\xi_{\mathbf{x}}^r = 0$ ,  $u_{\mathbf{x}}^{r'}$  and  $u_{\mathbf{x}}^r$  are inequivalent ( $r' \neq r$ ) and must be paired to form a co-irrep of  $\mathcal{M}_{\mathbf{x}}$ . When  $\xi_{\mathbf{x}}^r = -1$  or  $+1$ ,  $u_{\mathbf{x}}^{r'}$  and  $u_{\mathbf{x}}^r$  are equivalent ( $r' = r$ ). When  $\xi_{\mathbf{x}}^r = -1$ ,  $\{\hat{a}|\mathbf{x}, i\rangle\}$  and  $\{|\mathbf{x}, i\rangle\}$  are orthogonal to each other, and  $u_{\mathbf{x}}^r$  is 'paired with itself'. Finally, when  $\xi_{\mathbf{x}}^r = +1$ ,  $\{\hat{a}|\mathbf{x}, i\rangle\}$  and  $\{|\mathbf{x}, i\rangle\}$  are linearly dependent and  $u_{\mathbf{x}}^r$  alone stands a co-irrep of  $\mathcal{M}_{\mathbf{x}}$ . We put a co-irrep on the site  $\mathbf{x}$  and generate AI by placing symmetry-related copy of the orbital on each site of the lattice  $\mathcal{M}\mathbf{x} = \mathcal{G}\mathbf{x}$ .

### Section S6. Details of $\tilde{\mathcal{T}}\mathbf{b}$

Let us write  $\mathbf{b} = \{n_{\mathbf{k}}^{\alpha}\}$  and  $\tilde{\mathcal{T}}\mathbf{b} = \{\tilde{n}_{\mathbf{k}}^{\alpha}\}$ . By definition,  $\mathbf{b}$  has the representation  $\oplus_{\alpha} n_{\mathbf{k}}^{\alpha} u_{\mathbf{k}}^{\alpha}$  of  $\mathcal{G}_{\mathbf{k}}$  at  $\mathbf{k}$ . Then  $a = \tilde{\mathcal{T}}$  maps it to the representation  $\oplus_{\alpha} n_{\mathbf{k}}^{\alpha} u_{a(\mathbf{k})}^{\alpha}$  of  $\mathcal{G}_{a(\mathbf{k})}$  at  $a(\mathbf{k})$  [see Eq. (17)]. By definition of  $\tilde{\mathcal{T}}\mathbf{b}$ , this coincides with  $\oplus_{\alpha} \tilde{n}_{a(\mathbf{k})}^{\alpha} u_{a(\mathbf{k})}^{\alpha}$ , i.e.,

$$\oplus_{\alpha} \tilde{n}_{a(\mathbf{k})}^{\alpha} u_{a(\mathbf{k})}^{\alpha}(h) = \oplus_{\alpha} n_{\mathbf{k}}^{\alpha} u_{a(\mathbf{k})}^{\alpha}(h). \quad (26)$$

Solving for  $\tilde{n}_{\mathbf{k}}^{\alpha}$ , we get

$$\tilde{n}_{\mathbf{k}}^{\beta} = \frac{1}{|\mathcal{G}_{\mathbf{k}}/T|} \sum_{h \in \mathcal{G}_{\mathbf{k}}/T} \chi_{\mathbf{k}}^{\beta}(h)^* \sum_{\alpha} n_{\alpha^{-1}(\mathbf{k})}^{\alpha} \chi_{\mathbf{k}}^{\alpha}(h). \quad (27)$$

### Section S7. Magnetic layer groups

For each MLG, there is a corresponding MSG that can be achieved by stacking of 2D layers. Conversely, if an MSG  $\mathcal{M}$  is such that every element of  $m \in \mathcal{M}$  maps, say,  $z$  to either  $n \pm z$  ( $n \in \mathbb{Z}$ ) (i.e., no mixing of  $z$  with  $x$  or  $y$  or no fractional translation along  $z$ ), the MSG can be reduced to an MLG by projecting down to  $xy$  plane. (In the actual calculation, it suffices to set  $k_z = 0$ ). The projection down to  $yz$  and  $zx$  planes, if allowed, may also lead to an MSG. These three possible ways of projections lead to sometimes distinct and sometimes the identical MLGs. We present the computation results in Sec. I in a redundant way — for each 'parent' MSG, we list the computed numbers for all possible directions of projections among the three, regardless of their dependence/independence as MLGs. For example, for MSG 3.4, two projections down to  $xy$  and  $xz$  planes are possible and correspondingly we have two rows 3.4 (1) and 3.4 (2). For this MSG, the two projections correspond to two different MLGs. On the other hand, for the type II MSG 2.5, the three ways of projection lead to an identical MLG. Even in this case the redundant presentation has an advantage: e.g. it tells us that the three  $\mathbb{Z}_2$  factor of  $X_{\text{BS}} = (\mathbb{Z}_2)^3 \times \mathbb{Z}_4$  for MSG 2.5 can actually be attributed to the three orthogonal 2D planes, implying the presence of 'weak' phases.

### Section S8. Tight-binding model for reSM

Here we present a tight-binding model that realizes the 2D reSM described by the main text. We assume the MLG  $p_a 112$ . There are two sites in a unit cell. The A-sublattice is at  $\mathbf{x} = n_1 \mathbf{a}_1 + n_2 \mathbf{a}_2$  ( $n_1, n_2 \in \mathbb{Z}$ ) and the B-sublattice is at  $\mathbf{x} = (n_1 + \frac{1}{2}) \mathbf{a}_1 + n_2 \mathbf{a}_2$  ( $n, m \in \mathbb{Z}$ ). For simplicity let us set  $\mathbf{a}_1 = (2, 0)$ ,  $\mathbf{a}_2 = (-1, 1)$ . In the following, four by four matrices are in the basis  $(|A, \uparrow\rangle, |A, \downarrow\rangle, |B, \uparrow\rangle, |B, \downarrow\rangle)$ . We



assume the standard symmetry representation:

$$U_{\mathbf{k}}(C_{2z}) = i \begin{pmatrix} 1 & 0 & 0 & 0 \\ 0 & -1 & 0 & 0 \\ 0 & 0 & e^{-ik_1} & 0 \\ 0 & 0 & 0 & -e^{-ik_1} \end{pmatrix}, \quad (28)$$

$$U_{\mathbf{k}}(\mathcal{T}T_{\frac{1}{2}\mathbf{a}_1}) = \begin{pmatrix} 0 & 0 & 0 & -e^{ik_1} \\ 0 & 0 & e^{ik_1} & 0 \\ 0 & -1 & 0 & 0 \\ 1 & 0 & 0 & 0 \end{pmatrix} \quad (29)$$

satisfying

$$U_{-\mathbf{k}}(C_{2z})U_{\mathbf{k}}(C_{2z}) = -1, \quad (30)$$

$$U_{-\mathbf{k}}(\mathcal{T}T_{\frac{1}{2}\mathbf{a}_1})U_{\mathbf{k}}(\mathcal{T}T_{\frac{1}{2}\mathbf{a}_1})^* = -e^{-ik_1}. \quad (31)$$

An example of the tight-binding Hamiltonian in the momentum space reads

$$h(\mathbf{k}) = \sum_{\mu,\nu=0,4} g_{\mu,\nu}(\mathbf{k}) \sigma_{\mu} \otimes \sigma_{\nu}, \quad (32)$$

$$g_{1,0}(\mathbf{k}) = t[1 + \cos k_1 + \cos k_2 + \cos(k_1 + k_2)], \quad (33)$$

$$g_{2,0}(\mathbf{k}) = t[\sin k_1 - \sin k_2 + \sin(k_1 + k_2)] \quad (34)$$

$$g_{1,1}(\mathbf{k}) = t_J[1 - \cos k_1 + \cos k_2 - \cos(k_1 + k_2)], \quad (35)$$

$$g_{2,1}(\mathbf{k}) = -t_J[\sin k_1 + \sin k_2 + \sin(k_1 + k_2)], \quad (36)$$

$$g_{3,3}(\mathbf{k}) = J. \quad (37)$$

It is easy to check the symmetry of the Hamiltonian:

$$U_{\mathbf{k}}(C_{2z})h(\mathbf{k}) = h(-\mathbf{k})U_{\mathbf{k}}(C_{2z}), \quad (38)$$

$$U_{\mathbf{k}}(\mathcal{T}T_{\frac{1}{2}\mathbf{a}_1})h(\mathbf{k})^* = h(-\mathbf{k})U_{\mathbf{k}}(\mathcal{T}T_{\frac{1}{2}\mathbf{a}_1}). \quad (39)$$

When  $|t_J| < \frac{1}{2}J$ ,  $\eta = +1$  and the system is a band insulator. When  $|t_J| > \frac{1}{2}J$ ,  $\eta = -1$  and the system realizes a Dirac semimetal.

The MLG corresponding to the type III MSG 13.69 ( $P112'/a'$ ) can also host a Dirac semimetal through an almost identical mechanism. The MLG is generated by  $T_{\mathbf{a}_2}$ ,  $I$  (the 3D inversion), and  $\mathcal{T}G$  ( $G \equiv T_{\frac{1}{2}\mathbf{a}_1}IC_{2z}$  is the glide symmetry). The corresponding topological invariant  $\eta$  is defined by

$$\eta = \prod_{n:\text{occupied}} \prod_{\mathbf{k}=(0,0),(0,\pi)} \eta_{n,\mathbf{k}}, \quad (40)$$

where  $\eta_{n,\mathbf{k}}$  represents the inversion eigenvalue  $\pm 1$ .

## Section S9. Tables for spinless electrons

Here we include the following tables for spinless electrons:

- Tables S13–S18:  $d$ ,  $X_{BS}$ , and  $\nu_{BS}$  for MSGs.
- Table S19:  $\{\nu\}_{BS}$  and  $\{\nu\}_{AI}$  for exceptional MSGs.

Similar to the remarks in Sec. I, some previously published results are reproduced below for completeness.

Table S13. Characterization of MSGs in the triclinic family for spinless electrons

| MSG    | $d$ | $X_{BS}$ | $\nu_{BS}$ | MSG    | $d$ | $X_{BS}$     | $\nu_{BS}$ | MSG     | $d$ | $X_{BS}$     | $\nu_{BS}$ | MSG    | $d$ | $X_{BS}$  | $\nu_{BS}$ |
|--------|-----|----------|------------|--------|-----|--------------|------------|---------|-----|--------------|------------|--------|-----|-----------|------------|
| 1.1 I  | 1   | (1)      | 1          | 1.3 IV | 1   | (1)          | 2          | 2.5 II  | 9   | (2, 2, 2, 4) | 1          | 2.7 IV | 5   | (2, 2, 4) | 2          |
| 1.2 II | 1   | (1)      | 1          | 2.4 I  | 9   | (2, 2, 2, 4) | 1          | 2.6 III | 1   | (1)          | 1          |        |     |           |            |

$d$ : Rank of the band structure group  $\{BS\}$

$X_{BS}$ : Symmetry-based indicators of band topology

$\nu_{BS}$ : Set of  $\nu$  bands are symmetry-forbidden from being isolated by band gaps if  $\nu \notin \nu_{BS} \mathbb{Z}$

Table S14. Characterization of MSGs in the monoclinic family for spinless electrons.

| MSG      | $d$ | $X_{BS}$ | $\nu_{BS}$ | MSG       | $d$ | $X_{BS}$     | $\nu_{BS}$ | MSG       | $d$ | $X_{BS}$  | $\nu_{BS}$ | MSG       | $d$ | $X_{BS}$  | $\nu_{BS}$ |
|----------|-----|----------|------------|-----------|-----|--------------|------------|-----------|-----|-----------|------------|-----------|-----|-----------|------------|
| 3.1 I    | 5   | (2)      | 1          | 7.24 I    | 1   | (1)          | 2          | 10.47 IV  | 9   | (2, 2, 2) | 2          | 13.70 IV  | 4   | (2, 2)    | 4          |
| 3.2 II   | 5   | (2)      | 1          | 7.25 II   | 1   | (1)          | 2          | 10.48 IV  | 10  | (2, 2)    | 2          | 13.71 IV  | 5   | (2, 2)    | 4          |
| 3.3 III  | 1   | (1)      | 1          | 7.26 III  | 1   | (1)          | 2          | 10.49 IV  | 8   | (2, 2)    | 2          | 13.72 IV  | 7   | (2, 2)    | 2          |
| 3.4 IV   | 3   | (2)      | 2          | 7.27 IV   | 1   | (1)          | 4          | 11.50 I   | 6   | (2)       | 2          | 13.73 IV  | 5   | (2)       | 2          |
| 3.5 IV   | 5   | (2)      | 2          | 7.28 IV   | 1   | (1)          | 2          | 11.51 II  | 6   | (2)       | 2          | 13.74 IV  | 4   | (2)       | 4          |
| 3.6 IV   | 3   | (1)      | 2          | 7.29 IV   | 1   | (1)          | 4          | 11.52 III | 2   | (1)       | 2          | 14.75 I   | 5   | (2)       | 2          |
| 4.7 I    | 1   | (1)      | 2          | 7.30 IV   | 1   | (1)          | 4          | 11.53 III | 1   | (1)       | 2          | 14.76 II  | 5   | (2)       | 2          |
| 4.8 II   | 1   | (1)      | 2          | 7.31 IV   | 1   | (1)          | 2          | 11.54 III | 5   | (2, 2, 4) | 2          | 14.77 III | 1   | (1)       | 2          |
| 4.9 III  | 1   | (1)      | 2          | 8.32 I    | 2   | (1)          | 1          | 11.55 IV  | 4   | (2)       | 4          | 14.78 III | 1   | (1)       | 2          |
| 4.10 IV  | 1   | (1)      | 4          | 8.33 II   | 2   | (1)          | 1          | 11.56 IV  | 6   | (2)       | 2          | 14.79 III | 5   | (2, 4)    | 2          |
| 4.11 IV  | 1   | (1)      | 2          | 8.34 III  | 1   | (1)          | 1          | 11.57 IV  | 4   | (2)       | 2          | 14.80 IV  | 3   | (2)       | 4          |
| 4.12 IV  | 1   | (1)      | 2          | 8.35 IV   | 2   | (1)          | 2          | 12.58 I   | 10  | (2, 2)    | 1          | 14.81 IV  | 3   | (2)       | 4          |
| 5.13 I   | 3   | (1)      | 1          | 8.36 IV   | 2   | (1)          | 2          | 12.59 II  | 10  | (2, 2)    | 1          | 14.82 IV  | 3   | (2)       | 4          |
| 5.14 II  | 3   | (1)      | 1          | 9.37 I    | 1   | (1)          | 2          | 12.60 III | 2   | (1)       | 1          | 14.83 IV  | 5   | (2)       | 2          |
| 5.15 III | 1   | (1)      | 1          | 9.38 II   | 1   | (1)          | 2          | 12.61 III | 3   | (1)       | 1          | 14.84 IV  | 3   | (2)       | 4          |
| 5.16 IV  | 2   | (1)      | 2          | 9.39 III  | 1   | (1)          | 2          | 12.62 III | 7   | (2, 2, 4) | 1          | 15.85 I   | 6   | (2, 2)    | 2          |
| 5.17 IV  | 3   | (2)      | 2          | 9.40 IV   | 1   | (1)          | 2          | 12.63 IV  | 6   | (2, 2)    | 2          | 15.86 II  | 6   | (2, 2)    | 2          |
| 6.18 I   | 3   | (1)      | 1          | 9.41 IV   | 1   | (2)          | 2*         | 12.64 IV  | 8   | (2, 2)    | 2          | 15.87 III | 1   | (1)       | 2          |
| 6.19 II  | 3   | (1)      | 1          | 10.42 I   | 15  | (2, 2, 2)    | 1          | 13.65 I   | 7   | (2, 2)    | 2          | 15.88 III | 2   | (1)       | 2          |
| 6.20 III | 1   | (1)      | 1          | 10.43 II  | 15  | (2, 2, 2)    | 1          | 13.66 II  | 7   | (2, 2)    | 2          | 15.89 III | 5   | (2, 4)    | 2          |
| 6.21 IV  | 3   | (1)      | 2          | 10.44 III | 3   | (1)          | 1          | 13.67 III | 1   | (1)       | 2          | 15.90 IV  | 5   | (2, 2)    | 2          |
| 6.22 IV  | 2   | (1)      | 2          | 10.45 III | 5   | (2)          | 1          | 13.68 III | 3   | (2)       | 2          | 15.91 IV  | 4   | (2, 2, 2) | 2*         |
| 6.23 IV  | 2   | (1)      | 2          | 10.46 III | 9   | (2, 2, 2, 4) | 1          | 13.69 III | 5   | (2, 2, 4) | 2          |           |     |           |            |

$d$ : Rank of the band structure group  $\{BS\}$

$X_{BS}$ : Symmetry-based indicators of band topology

$\nu_{BS}$ : Set of  $\nu$  bands are symmetry-forbidden from being isolated by band gaps if  $\nu \notin \nu_{BS} \mathbb{Z}$

\*: Exhibiting exceptional filling pattern; see table S19

Table S15. Characterization of MSGs in the orthorhombic family for spinless electrons.

| MSG   | $d$ | $X_{BS}$ | $\nu_{BS}$ | MSG | $d$    | $X_{BS}$ | $\nu_{BS}$ | MSG | $d$ | $X_{BS}$ | $\nu_{BS}$ | MSG | $d$ | $X_{BS}$ | $\nu_{BS}$ |     |   |       |    |
|-------|-----|----------|------------|-----|--------|----------|------------|-----|-----|----------|------------|-----|-----|----------|------------|-----|---|-------|----|
| 16.1  | I   | 13       | (1)        | 1   | 23.51  | III      | 3          | (1) | 1   | 29.101   | III        | 1   | (1) | 4        | 33.151     | IV  | 1 | (1)   | 4  |
| 16.2  | II  | 13       | (1)        | 1   | 23.52  | IV       | 5          | (2) | 2   | 29.102   | III        | 1   | (1) | 4        | 33.152     | IV  | 1 | (1)   | 4  |
| 16.3  | III | 5        | (2)        | 1   | 24.53  | I        | 4          | (1) | 2   | 29.103   | III        | 1   | (1) | 4        | 33.153     | IV  | 1 | (1)   | 4  |
| 16.4  | IV  | 9        | (2)        | 2   | 24.54  | II       | 4          | (1) | 2   | 29.104   | IV         | 1   | (1) | 4        | 33.154     | IV  | 1 | (1)   | 4  |
| 16.5  | IV  | 7        | (2)        | 2   | 24.55  | III      | 2          | (1) | 2   | 29.105   | IV         | 1   | (2) | 4*       | 33.155     | IV  | 1 | (1)   | 4  |
| 16.6  | IV  | 7        | (2)        | 2   | 24.56  | IV       | 4          | (2) | 2   | 29.106   | IV         | 1   | (1) | 4        | 34.156     | I   | 3 | (1)   | 2  |
| 17.7  | I   | 5        | (1)        | 2   | 25.57  | I        | 9          | (1) | 1   | 29.107   | IV         | 1   | (1) | 4        | 34.157     | II  | 3 | (1)   | 2  |
| 17.8  | II  | 5        | (1)        | 2   | 25.58  | II       | 9          | (1) | 1   | 29.108   | IV         | 1   | (1) | 4        | 34.158     | III | 1 | (1)   | 2  |
| 17.9  | III | 1        | (1)        | 2   | 25.59  | III      | 3          | (1) | 1   | 29.109   | IV         | 1   | (1) | 4        | 34.159     | III | 3 | (1)   | 2  |
| 17.10 | III | 3        | (2)        | 2   | 25.60  | III      | 5          | (2) | 1   | 29.110   | IV         | 1   | (1) | 4        | 34.160     | IV  | 2 | (1)   | 4  |
| 17.11 | IV  | 4        | (2)        | 4   | 25.61  | IV       | 9          | (1) | 2   | 30.111   | I          | 3   | (1) | 2        | 34.161     | IV  | 3 | (2)   | 4  |
| 17.12 | IV  | 5        | (1)        | 2   | 25.62  | IV       | 6          | (1) | 2   | 30.112   | II         | 3   | (1) | 2        | 34.162     | IV  | 2 | (1)   | 4  |
| 17.13 | IV  | 4        | (1)        | 2   | 25.63  | IV       | 5          | (1) | 2   | 30.113   | III        | 1   | (1) | 2        | 34.163     | IV  | 3 | (2)   | 4  |
| 17.14 | IV  | 3        | (2)        | 4   | 25.64  | IV       | 6          | (1) | 2   | 30.114   | III        | 1   | (1) | 2        | 34.164     | IV  | 3 | (1)   | 2  |
| 17.15 | IV  | 3        | (1)        | 4   | 25.65  | IV       | 5          | (1) | 2   | 30.115   | III        | 3   | (1) | 2        | 35.165     | I   | 6 | (1)   | 1  |
| 18.16 | I   | 3        | (1)        | 2   | 26.66  | I        | 3          | (1) | 2   | 30.116   | IV         | 2   | (1) | 4        | 35.166     | II  | 6 | (1)   | 1  |
| 18.17 | II  | 3        | (1)        | 2   | 26.67  | II       | 3          | (1) | 2   | 30.117   | IV         | 3   | (2) | 4        | 35.167     | III | 2 | (1)   | 1  |
| 18.18 | III | 3        | (2)        | 2   | 26.68  | III      | 1          | (1) | 2   | 30.118   | IV         | 3   | (2) | 4        | 35.168     | III | 4 | (2)   | 1  |
| 18.19 | III | 1        | (1)        | 2   | 26.69  | III      | 3          | (1) | 2   | 30.119   | IV         | 3   | (1) | 2        | 35.169     | IV  | 6 | (1)   | 2  |
| 18.20 | IV  | 2        | (1)        | 4   | 26.70  | III      | 1          | (1) | 2   | 30.120   | IV         | 2   | (2) | 4        | 35.170     | IV  | 5 | (1)   | 2  |
| 18.21 | IV  | 3        | (2)        | 4   | 26.71  | IV       | 2          | (1) | 4   | 30.121   | IV         | 2   | (1) | 4        | 35.171     | IV  | 5 | (1)   | 2  |
| 18.22 | IV  | 2        | (1)        | 4   | 26.72  | IV       | 3          | (1) | 4   | 30.122   | IV         | 2   | (1) | 4        | 36.172     | I   | 2 | (1)   | 2  |
| 18.23 | IV  | 3        | (1)        | 2   | 26.73  | IV       | 3          | (1) | 2   | 31.123   | I          | 2   | (1) | 2        | 36.173     | II  | 2 | (1)   | 2  |
| 18.24 | IV  | 3        | (1)        | 2   | 26.74  | IV       | 3          | (1) | 2   | 31.124   | II         | 2   | (1) | 2        | 36.174     | III | 1 | (1)   | 2  |
| 19.25 | I   | 1        | (1)        | 4   | 26.75  | IV       | 2          | (1) | 4   | 31.125   | III        | 1   | (1) | 2        | 36.175     | III | 2 | (1)   | 2  |
| 19.26 | II  | 1        | (1)        | 4   | 26.76  | IV       | 2          | (1) | 4   | 31.126   | III        | 2   | (1) | 2        | 36.176     | III | 1 | (1)   | 2  |
| 19.27 | III | 1        | (1)        | 4   | 26.77  | IV       | 2          | (1) | 4   | 31.127   | III        | 1   | (1) | 2        | 36.177     | IV  | 2 | (1)   | 2  |
| 19.28 | IV  | 1        | (1)        | 4   | 27.78  | I        | 5          | (2) | 2   | 31.128   | IV         | 2   | (1) | 4        | 36.178     | IV  | 2 | (1)   | 4  |
| 19.29 | IV  | 1        | (1)        | 4   | 27.79  | II       | 5          | (2) | 2   | 31.129   | IV         | 2   | (1) | 4        | 36.179     | IV  | 2 | (1)   | 2  |
| 19.30 | IV  | 1        | (1)        | 4   | 27.80  | III      | 1          | (1) | 2   | 31.130   | IV         | 2   | (1) | 4        | 37.180     | I   | 4 | (2)   | 2  |
| 20.31 | I   | 3        | (1)        | 2   | 27.81  | III      | 5          | (2) | 2   | 31.131   | IV         | 2   | (1) | 4        | 37.181     | II  | 4 | (2)   | 2  |
| 20.32 | II  | 3        | (1)        | 2   | 27.82  | IV       | 5          | (2) | 2   | 31.132   | IV         | 2   | (1) | 2        | 37.182     | III | 1 | (1)   | 2  |
| 20.33 | III | 1        | (1)        | 2   | 27.83  | IV       | 3          | (2) | 4   | 31.133   | IV         | 2   | (1) | 4        | 37.183     | III | 4 | (2)   | 2  |
| 20.34 | III | 2        | (1)        | 2   | 27.84  | IV       | 3          | (2) | 4   | 31.134   | IV         | 2   | (1) | 2        | 37.184     | IV  | 4 | (2)   | 2  |
| 20.35 | IV  | 3        | (1)        | 2   | 27.85  | IV       | 3          | (2) | 4   | 32.135   | I          | 3   | (1) | 2        | 37.185     | IV  | 3 | (2,2) | 2* |
| 20.36 | IV  | 3        | (2)        | 4   | 27.86  | IV       | 3          | (2) | 4   | 32.136   | II         | 3   | (1) | 2        | 37.186     | IV  | 3 | (2)   | 2  |
| 20.37 | IV  | 3        | (1)        | 2   | 28.87  | I        | 4          | (1) | 2   | 32.137   | III        | 1   | (1) | 2        | 38.187     | I   | 6 | (1)   | 1  |
| 21.38 | I   | 8        | (1)        | 1   | 28.88  | II       | 4          | (1) | 2   | 32.138   | III        | 3   | (2) | 2        | 38.188     | II  | 6 | (1)   | 1  |
| 21.39 | II  | 8        | (1)        | 1   | 28.89  | III      | 1          | (1) | 2   | 32.139   | IV         | 3   | (2) | 4        | 38.189     | III | 2 | (1)   | 1  |
| 21.40 | III | 4        | (2)        | 1   | 28.90  | III      | 2          | (1) | 2   | 32.140   | IV         | 2   | (1) | 4        | 38.190     | III | 3 | (1)   | 1  |
| 21.41 | III | 3        | (1)        | 1   | 28.91  | III      | 3          | (2) | 2   | 32.141   | IV         | 3   | (1) | 2        | 38.191     | III | 3 | (1)   | 1  |
| 21.42 | IV  | 6        | (2)        | 2   | 28.92  | IV       | 4          | (1) | 2   | 32.142   | IV         | 2   | (1) | 4        | 38.192     | IV  | 4 | (1)   | 2  |
| 21.43 | IV  | 7        | (2)        | 2   | 28.93  | IV       | 3          | (1) | 4   | 32.143   | IV         | 3   | (1) | 4        | 38.193     | IV  | 6 | (1)   | 2  |
| 21.44 | IV  | 5        | (2)        | 2   | 28.94  | IV       | 4          | (1) | 4   | 33.144   | I          | 1   | (1) | 4        | 38.194     | IV  | 4 | (1)   | 2  |
| 22.45 | I   | 7        | (1)        | 1   | 28.95  | IV       | 3          | (1) | 4   | 33.145   | II         | 1   | (1) | 4        | 39.195     | I   | 4 | (1)   | 2  |
| 22.46 | II  | 7        | (1)        | 1   | 28.96  | IV       | 4          | (1) | 4   | 33.146   | III        | 1   | (1) | 4        | 39.196     | II  | 4 | (1)   | 2  |
| 22.47 | III | 3        | (1)        | 1   | 28.97  | IV       | 3          | (1) | 2   | 33.147   | III        | 1   | (1) | 4        | 39.197     | III | 2 | (1)   | 2  |
| 22.48 | IV  | 7        | (2)        | 2   | 28.98  | IV       | 3          | (1) | 4   | 33.148   | III        | 1   | (1) | 4        | 39.198     | III | 1 | (1)   | 2  |
| 23.49 | I   | 7        | (1)        | 1   | 29.99  | I        | 1          | (1) | 4   | 33.149   | IV         | 1   | (1) | 4        | 39.199     | III | 3 | (2)   | 2  |
| 23.50 | II  | 7        | (1)        | 1   | 29.100 | II       | 1          | (1) | 4   | 33.150   | IV         | 1   | (1) | 8        | 39.200     | IV  | 3 | (1)   | 4  |

(Continued from the previous page)

|            |          |            |                |            |             |            |               |
|------------|----------|------------|----------------|------------|-------------|------------|---------------|
| 39.201 IV  | 4 (1) 2  | 47.251 III | 9 (1) 1        | 51.301 IV  | 7 (1) 4     | 54.351 IV  | 4 (2) 4       |
| 39.202 IV  | 3 (1) 2  | 47.252 III | 15 (2, 2, 2) 1 | 51.302 IV  | 9 (1) 2     | 54.352 IV  | 4 (2) 8       |
| 40.203 I   | 3 (1) 2  | 47.253 III | 13 (1) 1       | 51.303 IV  | 8 (1) 4     | 55.353 I   | 9 (1) 2       |
| 40.204 II  | 3 (1) 2  | 47.254 IV  | 18 (1) 2       | 51.304 IV  | 7 (1) 4     | 55.354 II  | 9 (1) 2       |
| 40.205 III | 1 (1) 2  | 47.255 IV  | 15 (1) 2       | 52.305 I   | 5 (2) 4     | 55.355 III | 3 (1) 2       |
| 40.206 III | 2 (1) 2  | 47.256 IV  | 14 (1) 2       | 52.306 II  | 5 (2) 4     | 55.356 III | 3 (1) 2       |
| 40.207 III | 2 (1) 2  | 48.257 I   | 9 (2) 2        | 52.307 III | 2 (1) 4     | 55.357 III | 9 (2, 2, 2) 2 |
| 40.208 IV  | 3 (1) 2  | 48.258 II  | 9 (2) 2        | 52.308 III | 1 (1) 4     | 55.358 III | 5 (2) 2       |
| 40.209 IV  | 3 (1) 4  | 48.259 III | 3 (1) 2        | 52.309 III | 2 (1) 4     | 55.359 III | 3 (1) 2       |
| 40.210 IV  | 3 (1) 2  | 48.260 III | 5 (2) 2        | 52.310 III | 4 (2) 4     | 55.360 IV  | 6 (1) 4       |
| 41.211 I   | 2 (1) 2  | 48.261 III | 7 (2) 2        | 52.311 III | 4 (2) 4     | 55.361 IV  | 6 (1) 4       |
| 41.212 II  | 2 (1) 2  | 48.262 IV  | 6 (2, 2) 4     | 52.312 III | 3 (2) 4     | 55.362 IV  | 5 (1) 4       |
| 41.213 III | 1 (1) 2  | 48.263 IV  | 7 (2, 2) 4     | 52.313 III | 3 (1) 4     | 55.363 IV  | 9 (1) 2       |
| 41.214 III | 1 (1) 2  | 48.264 IV  | 8 (2) 2        | 52.314 IV  | 5 (2, 2) 4  | 55.364 IV  | 6 (1) 4       |
| 41.215 III | 2 (2) 2  | 49.265 I   | 14 (2) 2       | 52.315 IV  | 4 (2) 4     | 56.365 I   | 5 (2) 4       |
| 41.216 IV  | 2 (1) 4  | 49.266 II  | 14 (2) 2       | 52.316 IV  | 4 (2, 2) 8  | 56.366 II  | 5 (2) 4       |
| 41.217 IV  | 2 (2) 2* | 49.267 III | 4 (1) 2        | 52.317 IV  | 5 (2) 4     | 56.367 III | 1 (1) 4       |
| 41.218 IV  | 2 (1) 2  | 49.268 III | 5 (2) 2        | 52.318 IV  | 4 (2) 4     | 56.368 III | 3 (2) 4       |
| 42.219 I   | 5 (1) 1  | 49.269 III | 10 (2, 2) 2    | 52.319 IV  | 4 (2, 2) 4  | 56.369 III | 5 (2, 2) 4    |
| 42.220 II  | 5 (1) 1  | 49.270 III | 7 (2, 2) 2     | 52.320 IV  | 5 (2) 4     | 56.370 III | 3 (2) 4       |
| 42.221 III | 2 (1) 1  | 49.271 III | 9 (2) 2        | 53.321 I   | 9 (2) 2     | 56.371 III | 3 (2) 4       |
| 42.222 III | 3 (2) 1  | 49.272 IV  | 9 (2) 4        | 53.322 II  | 9 (2) 2     | 56.372 IV  | 3 (2) 8       |
| 42.223 IV  | 5 (1) 2  | 49.273 IV  | 14 (2) 2       | 53.323 III | 3 (1) 2     | 56.373 IV  | 4 (2) 4       |
| 43.224 I   | 2 (1) 2  | 49.274 IV  | 9 (2) 4        | 53.324 III | 3 (1) 2     | 56.374 IV  | 4 (2) 4       |
| 43.225 II  | 2 (1) 2  | 49.275 IV  | 8 (2) 4        | 53.325 III | 2 (1) 2     | 56.375 IV  | 5 (2) 4       |
| 43.226 III | 1 (1) 2  | 49.276 IV  | 8 (2) 4        | 53.326 III | 5 (2) 2     | 56.376 IV  | 4 (2) 4       |
| 43.227 III | 2 (1) 2  | 50.277 I   | 9 (2) 2        | 53.327 III | 8 (2, 2) 2  | 57.377 I   | 5 (1) 4       |
| 43.228 IV  | 2 (2) 2* | 50.278 II  | 9 (2) 2        | 53.328 III | 6 (2, 2) 2  | 57.378 II  | 5 (1) 4       |
| 44.229 I   | 5 (1) 1  | 50.279 III | 3 (1) 2        | 53.329 III | 4 (1) 2     | 57.379 III | 3 (1) 4       |
| 44.230 II  | 5 (1) 1  | 50.280 III | 3 (1) 2        | 53.330 IV  | 7 (2) 4     | 57.380 III | 2 (1) 4       |
| 44.231 III | 2 (1) 1  | 50.281 III | 5 (2, 2) 2     | 53.331 IV  | 6 (2) 4     | 57.381 III | 1 (1) 4       |
| 44.232 III | 3 (1) 1  | 50.282 III | 5 (2) 2        | 53.332 IV  | 7 (2) 4     | 57.382 III | 4 (2) 4       |
| 44.233 IV  | 5 (1) 2  | 50.283 III | 7 (2) 2        | 53.333 IV  | 6 (2) 4     | 57.383 III | 4 (2, 2) 4    |
| 44.234 IV  | 4 (1) 2  | 50.284 IV  | 8 (2, 2) 4     | 53.334 IV  | 9 (2) 2     | 57.384 III | 3 (2) 4       |
| 45.235 I   | 3 (2) 2  | 50.285 IV  | 6 (2, 2) 4     | 53.335 IV  | 6 (2) 4     | 57.385 III | 2 (1) 4       |
| 45.236 II  | 3 (1) 2  | 50.286 IV  | 5 (2, 2) 4     | 53.336 IV  | 6 (2) 4     | 57.386 IV  | 4 (1) 8       |
| 45.237 III | 1 (1) 2  | 50.287 IV  | 9 (2) 2        | 54.337 I   | 6 (2) 4     | 57.387 IV  | 5 (1) 4       |
| 45.238 III | 3 (2) 2  | 50.288 IV  | 6 (2) 4        | 54.338 II  | 6 (2) 4     | 57.388 IV  | 5 (1) 4       |
| 45.239 IV  | 3 (2) 2  | 51.289 I   | 12 (1) 2       | 54.339 III | 1 (1) 4     | 57.389 IV  | 5 (1) 4       |
| 45.240 IV  | 2 (2) 2* | 51.290 II  | 12 (1) 2       | 54.340 III | 2 (1) 4     | 57.390 IV  | 4 (1) 4       |
| 46.241 I   | 3 (1) 2  | 51.291 III | 3 (1) 2        | 54.341 III | 3 (2) 4     | 57.391 IV  | 4 (1) 4       |
| 46.242 II  | 3 (1) 2  | 51.292 III | 4 (1) 2        | 54.342 III | 5 (2, 2) 4  | 57.392 IV  | 4 (1) 4       |
| 46.243 III | 1 (1) 2  | 51.293 III | 6 (1) 2        | 54.343 III | 3 (2) 4     | 58.393 I   | 8 (2) 2       |
| 46.244 III | 2 (1) 2  | 51.294 III | 7 (2, 2) 2     | 54.344 III | 4 (2, 2) 4  | 58.394 II  | 8 (2) 2       |
| 46.245 III | 2 (1) 2  | 51.295 III | 6 (2) 2        | 54.345 III | 4 (2) 4     | 58.395 III | 2 (1) 2       |
| 46.246 IV  | 3 (1) 2  | 51.296 III | 9 (2, 2, 2) 2  | 54.346 IV  | 6 (2) 4     | 58.396 III | 3 (1) 2       |
| 46.247 IV  | 3 (1) 2  | 51.297 III | 5 (1) 2        | 54.347 IV  | 4 (2, 2) 4* | 58.397 III | 8 (2, 2) 2    |
| 46.248 IV  | 3 (1) 4  | 51.298 IV  | 12 (1) 2       | 54.348 IV  | 6 (2) 4     | 58.398 III | 5 (2) 2       |
| 47.249 I   | 27 (1) 1 | 51.299 IV  | 8 (1) 4        | 54.349 IV  | 4 (2) 4     | 58.399 III | 3 (1) 2       |
| 47.250 II  | 27 (1) 1 | 51.300 IV  | 9 (1) 4        | 54.350 IV  | 6 (2) 4     | 58.400 IV  | 5 (2) 4       |

(Continued from the previous page)

|        |     |   |        |    |        |     |    |        |   |        |     |    |           |    |        |     |    |        |    |
|--------|-----|---|--------|----|--------|-----|----|--------|---|--------|-----|----|-----------|----|--------|-----|----|--------|----|
| 58.401 | IV  | 6 | (2)    | 4  | 62.442 | II  | 4  | (1)    | 4 | 65.483 | III | 6  | (1)       | 1  | 69.524 | III | 9  | (2, 2) | 1  |
| 58.402 | IV  | 5 | (2)    | 4  | 62.443 | III | 2  | (1)    | 4 | 65.484 | III | 6  | (1)       | 1  | 69.525 | III | 7  | (2)    | 1  |
| 58.403 | IV  | 6 | (2)    | 4  | 62.444 | III | 1  | (1)    | 4 | 65.485 | III | 12 | (2, 2, 2) | 1  | 69.526 | IV  | 14 | (1)    | 2  |
| 58.404 | IV  | 8 | (2)    | 2  | 62.445 | III | 2  | (1)    | 4 | 65.486 | III | 10 | (2, 2)    | 1  | 70.527 | I   | 6  | (2)    | 2  |
| 59.405 | I   | 7 | (1)    | 2  | 62.446 | III | 3  | (2)    | 4 | 65.487 | III | 8  | (1)       | 1  | 70.528 | II  | 6  | (2)    | 2  |
| 59.406 | II  | 7 | (1)    | 2  | 62.447 | III | 3  | (2)    | 4 | 65.488 | IV  | 12 | (1)       | 2  | 70.529 | III | 2  | (1)    | 2  |
| 59.407 | III | 2 | (1)    | 2  | 62.448 | III | 4  | (2)    | 4 | 65.489 | IV  | 15 | (1)       | 2  | 70.530 | III | 4  | (2)    | 2  |
| 59.408 | III | 5 | (1)    | 2  | 62.449 | III | 1  | (1)    | 4 | 65.490 | IV  | 11 | (1)       | 2  | 70.531 | III | 4  | (1)    | 2  |
| 59.409 | III | 5 | (2, 2) | 2  | 62.450 | IV  | 3  | (1)    | 4 | 66.491 | I   | 11 | (2)       | 2  | 70.532 | IV  | 5  | (2, 2) | 2* |
| 59.410 | III | 4 | (2)    | 2  | 62.451 | IV  | 4  | (1)    | 4 | 66.492 | II  | 11 | (2)       | 2  | 71.533 | I   | 15 | (1)    | 1  |
| 59.411 | III | 3 | (1)    | 2  | 62.452 | IV  | 3  | (1)    | 8 | 66.493 | III | 3  | (1)       | 2  | 71.534 | II  | 15 | (1)    | 1  |
| 59.412 | IV  | 6 | (1)    | 4  | 62.453 | IV  | 3  | (1)    | 4 | 66.494 | III | 4  | (2)       | 2  | 71.535 | III | 5  | (1)    | 1  |
| 59.413 | IV  | 6 | (1)    | 4  | 62.454 | IV  | 4  | (1)    | 4 | 66.495 | III | 9  | (2, 2)    | 2  | 71.536 | III | 9  | (2, 2) | 1  |
| 59.414 | IV  | 5 | (1)    | 4  | 62.455 | IV  | 3  | (1)    | 4 | 66.496 | III | 6  | (2, 2)    | 2  | 71.537 | III | 7  | (1)    | 1  |
| 59.415 | IV  | 7 | (1)    | 2  | 62.456 | IV  | 4  | (1)    | 4 | 66.497 | III | 6  | (2)       | 2  | 71.538 | IV  | 11 | (1)    | 2  |
| 59.416 | IV  | 6 | (1)    | 2  | 63.457 | I   | 8  | (1)    | 2 | 66.498 | IV  | 10 | (2)       | 2  | 72.539 | I   | 9  | (1)    | 2  |
| 60.417 | I   | 4 | (2)    | 4  | 63.458 | II  | 8  | (1)    | 2 | 66.499 | IV  | 8  | (2)       | 4  | 72.540 | II  | 9  | (1)    | 2  |
| 60.418 | II  | 4 | (2)    | 4  | 63.459 | III | 3  | (1)    | 2 | 66.500 | IV  | 9  | (2)       | 2  | 72.541 | III | 3  | (1)    | 2  |
| 60.419 | III | 1 | (1)    | 4  | 63.460 | III | 4  | (1)    | 2 | 67.501 | I   | 13 | (1)       | 2  | 72.542 | III | 3  | (2)    | 2  |
| 60.420 | III | 2 | (1)    | 4  | 63.461 | III | 2  | (1)    | 2 | 67.502 | II  | 13 | (1)       | 2  | 72.543 | III | 7  | (2, 2) | 2  |
| 60.421 | III | 1 | (1)    | 4  | 63.462 | III | 5  | (2)    | 2 | 67.503 | III | 4  | (1)       | 2  | 72.544 | III | 5  | (2, 2) | 2  |
| 60.422 | III | 3 | (2)    | 4  | 63.463 | III | 6  | (2, 2) | 2 | 67.504 | III | 5  | (1)       | 2  | 72.545 | III | 5  | (2)    | 2  |
| 60.423 | III | 3 | (2)    | 4  | 63.464 | III | 5  | (2, 2) | 2 | 67.505 | III | 7  | (2, 2)    | 2  | 72.546 | IV  | 9  | (1)    | 2  |
| 60.424 | III | 4 | (2, 2) | 4  | 63.465 | III | 3  | (1)    | 2 | 67.506 | III | 8  | (2, 2)    | 2  | 72.547 | IV  | 7  | (1)    | 4  |
| 60.425 | III | 2 | (1)    | 4  | 63.466 | IV  | 8  | (1)    | 2 | 67.507 | III | 7  | (2)       | 2  | 73.548 | I   | 6  | (2)    | 2* |
| 60.426 | IV  | 3 | (2, 2) | 4* | 63.467 | IV  | 7  | (1)    | 4 | 67.508 | IV  | 9  | (1)       | 4  | 73.549 | II  | 6  | (1)    | 4  |
| 60.427 | IV  | 3 | (2)    | 8  | 63.468 | IV  | 7  | (1)    | 2 | 67.509 | IV  | 13 | (1)       | 2  | 73.550 | III | 2  | (2)    | 2* |
| 60.428 | IV  | 4 | (2)    | 4  | 64.469 | I   | 7  | (1)    | 2 | 67.510 | IV  | 9  | (1)       | 2  | 73.551 | III | 4  | (2, 2) | 4  |
| 60.429 | IV  | 3 | (2)    | 4  | 64.470 | II  | 7  | (1)    | 2 | 68.511 | I   | 7  | (2)       | 2  | 73.552 | III | 4  | (2, 2) | 4  |
| 60.430 | IV  | 3 | (2)    | 4  | 64.471 | III | 2  | (1)    | 2 | 68.512 | II  | 7  | (2)       | 2  | 73.553 | IV  | 6  | (2)    | 2* |
| 60.431 | IV  | 4 | (2)    | 4  | 64.472 | III | 3  | (1)    | 2 | 68.513 | III | 2  | (1)       | 2  | 74.554 | I   | 10 | (1)    | 2  |
| 60.432 | IV  | 4 | (2)    | 4  | 64.473 | III | 2  | (1)    | 2 | 68.514 | III | 3  | (2)       | 2  | 74.555 | II  | 10 | (1)    | 2  |
| 61.433 | I   | 3 | (2)    | 4  | 64.474 | III | 4  | (2)    | 2 | 68.515 | III | 5  | (2, 2)    | 2  | 74.556 | III | 3  | (1)    | 2  |
| 61.434 | II  | 3 | (1)    | 4  | 64.475 | III | 6  | (2, 2) | 2 | 68.516 | III | 4  | (2, 2)    | 2  | 74.557 | III | 4  | (1)    | 2  |
| 61.435 | III | 1 | (1)    | 4  | 64.476 | III | 5  | (2, 2) | 2 | 68.517 | III | 5  | (2, 2)    | 2  | 74.558 | III | 6  | (2, 2) | 2  |
| 61.436 | III | 3 | (2)    | 4  | 64.477 | III | 3  | (2)    | 2 | 68.518 | IV  | 7  | (2)       | 4  | 74.559 | III | 7  | (2, 2) | 2  |
| 61.437 | III | 1 | (1)    | 4  | 64.478 | IV  | 6  | (1)    | 4 | 68.519 | IV  | 7  | (2, 2)    | 2* | 74.560 | III | 4  | (1)    | 2  |
| 61.438 | IV  | 2 | (2)    | 4* | 64.479 | IV  | 6  | (1)    | 4 | 68.520 | IV  | 7  | (2)       | 2  | 74.561 | IV  | 8  | (1)    | 4  |
| 61.439 | IV  | 3 | (2)    | 4  | 64.480 | IV  | 7  | (1)    | 2 | 69.521 | I   | 15 | (1)       | 1  | 74.562 | IV  | 9  | (1)    | 2  |
| 61.440 | IV  | 2 | (2)    | 4* | 65.481 | I   | 18 | (1)    | 1 | 69.522 | II  | 15 | (1)       | 1  |        |     |    |        |    |
| 62.441 | I   | 4 | (1)    | 4  | 65.482 | II  | 18 | (1)    | 1 | 69.523 | III | 5  | (1)       | 1  |        |     |    |        |    |

$d$ : Rank of the band structure group  $\{\text{BS}\}$

$X_{\text{BS}}$ : Symmetry-based indicators of band topology

$\nu_{\text{BS}}$ : Set of  $\nu$  bands are symmetry-forbidden from being isolated by band gaps if  $\nu \notin \nu_{\text{BS}} \mathbb{Z}$

\*: Exhibiting exceptional filling pattern; see table S19

Table S16. Characterization of MSGs in the tetragonal family for spinless electrons.

| MSG   | $d$ | $X_{BS}$ | $\nu_{BS}$ | MSG | $d$    | $X_{BS}$ | $\nu_{BS}$ | MSG          | $d$ | $X_{BS}$ | $\nu_{BS}$ | MSG | $d$ | $X_{BS}$ | $\nu_{BS}$ |     |   |     |    |
|-------|-----|----------|------------|-----|--------|----------|------------|--------------|-----|----------|------------|-----|-----|----------|------------|-----|---|-----|----|
| 75.1  | I   | 8        | (4)        | 1   | 84.51  | I        | 13         | (2, 4)       | 2   | 90.101   | IV         | 7   | (1) | 2        | 97.151     | I   | 8 | (1) | 1  |
| 75.2  | II  | 6        | (2)        | 1   | 84.52  | II       | 11         | (2, 2)       | 2   | 90.102   | IV         | 6   | (2) | 2        | 97.152     | II  | 8 | (1) | 1  |
| 75.3  | III | 4        | (1)        | 1   | 84.53  | III      | 9          | (2)          | 2   | 91.103   | I          | 4   | (1) | 4        | 97.153     | III | 5 | (1) | 1  |
| 75.4  | IV  | 6        | (2)        | 2   | 84.54  | III      | 4          | (2)          | 2   | 91.104   | II         | 4   | (1) | 4        | 97.154     | III | 5 | (2) | 1  |
| 75.5  | IV  | 5        | (2)        | 2   | 84.55  | III      | 8          | (2, 2, 2)    | 2   | 91.105   | III        | 3   | (1) | 4        | 97.155     | III | 5 | (1) | 1  |
| 75.6  | IV  | 5        | (2)        | 2   | 84.56  | IV       | 10         | (2)          | 2   | 91.106   | III        | 1   | (1) | 4        | 97.156     | IV  | 7 | (1) | 2  |
| 76.7  | I   | 1        | (1)        | 4   | 84.57  | IV       | 8          | (2, 2)       | 4   | 91.107   | III        | 2   | (1) | 4        | 98.157     | I   | 5 | (1) | 2  |
| 76.8  | II  | 1        | (1)        | 4   | 84.58  | IV       | 9          | (2)          | 2   | 91.108   | IV         | 4   | (1) | 4        | 98.158     | II  | 5 | (1) | 2  |
| 76.9  | III | 1        | (1)        | 4   | 85.59  | I        | 11         | (2, 4)       | 2   | 91.109   | IV         | 3   | (2) | 4*       | 98.159     | III | 3 | (1) | 2  |
| 76.10 | IV  | 1        | (1)        | 4   | 85.60  | II       | 8          | (2)          | 2   | 91.110   | IV         | 3   | (1) | 4        | 98.160     | III | 2 | (1) | 2  |
| 76.11 | IV  | 1        | (2)        | 4*  | 85.61  | III      | 5          | (1)          | 2   | 92.111   | I          | 2   | (1) | 4        | 98.161     | III | 4 | (1) | 2  |
| 76.12 | IV  | 1        | (1)        | 4   | 85.62  | III      | 5          | (2)          | 2   | 92.112   | II         | 2   | (1) | 4        | 98.162     | IV  | 5 | (2) | 2* |
| 77.13 | I   | 4        | (2)        | 2   | 85.63  | III      | 7          | (2, 2, 2)    | 2   | 92.113   | III        | 1   | (1) | 4        | 99.163     | I   | 9 | (1) | 1  |
| 77.14 | II  | 4        | (2)        | 2   | 85.64  | IV       | 7          | (2)          | 4   | 92.114   | III        | 1   | (1) | 4        | 99.164     | II  | 9 | (1) | 1  |
| 77.15 | III | 4        | (2)        | 2   | 85.65  | IV       | 8          | (2)          | 2   | 92.115   | III        | 2   | (1) | 4        | 99.165     | III | 5 | (1) | 1  |
| 77.16 | IV  | 4        | (1)        | 2   | 85.66  | IV       | 7          | (2)          | 2   | 92.116   | IV         | 2   | (1) | 4        | 99.166     | III | 6 | (1) | 1  |
| 77.17 | IV  | 3        | (2, 2)     | 2*  | 86.67  | I        | 9          | (2, 2)       | 2   | 92.117   | IV         | 2   | (2) | 4*       | 99.167     | III | 8 | (4) | 1  |
| 77.18 | IV  | 3        | (1)        | 2   | 86.68  | II       | 7          | (2)          | 2   | 92.118   | IV         | 2   | (1) | 4        | 99.168     | IV  | 9 | (1) | 2  |
| 78.19 | I   | 1        | (1)        | 4   | 86.69  | III      | 5          | (2)          | 2   | 93.119   | I          | 10  | (1) | 2        | 99.169     | IV  | 6 | (1) | 2  |
| 78.20 | II  | 1        | (1)        | 4   | 86.70  | III      | 3          | (2)          | 2   | 93.120   | II         | 10  | (1) | 2        | 99.170     | IV  | 6 | (1) | 2  |
| 78.21 | III | 1        | (1)        | 4   | 86.71  | III      | 7          | (2, 2, 2, 2) | 2   | 93.121   | III        | 8   | (2) | 2        | 100.171    | I   | 6 | (1) | 2  |
| 78.22 | IV  | 1        | (1)        | 4   | 86.72  | IV       | 6          | (1)          | 4   | 93.122   | III        | 4   | (2) | 2        | 100.172    | II  | 5 | (1) | 2  |
| 78.23 | IV  | 1        | (2)        | 4*  | 86.73  | IV       | 7          | (2, 2)       | 2*  | 93.123   | III        | 6   | (2) | 2        | 100.173    | III | 4 | (1) | 2  |
| 78.24 | IV  | 1        | (1)        | 4   | 86.74  | IV       | 6          | (1)          | 2   | 93.124   | IV         | 7   | (1) | 2        | 100.174    | III | 3 | (1) | 2  |
| 79.25 | I   | 5        | (2)        | 1   | 87.75  | I        | 16         | (4, 4)       | 1   | 93.125   | IV         | 7   | (2) | 2*       | 100.175    | III | 5 | (4) | 2  |
| 79.26 | II  | 4        | (1)        | 1   | 87.76  | II       | 12         | (2, 2)       | 1   | 93.126   | IV         | 6   | (1) | 2        | 100.176    | IV  | 5 | (1) | 4  |
| 79.27 | III | 3        | (1)        | 1   | 87.77  | III      | 8          | (1)          | 1   | 94.127   | I          | 5   | (1) | 2        | 100.177    | IV  | 6 | (1) | 2  |
| 79.28 | IV  | 4        | (1)        | 2   | 87.78  | III      | 4          | (2)          | 1   | 94.128   | II         | 5   | (1) | 2        | 100.178    | IV  | 6 | (1) | 4  |
| 80.29 | I   | 2        | (1)        | 2   | 87.79  | III      | 7          | (2, 2)       | 1   | 94.129   | III        | 3   | (2) | 2        | 101.179    | I   | 5 | (1) | 2  |
| 80.30 | II  | 2        | (1)        | 2   | 87.80  | IV       | 11         | (2, 2)       | 2   | 94.130   | III        | 3   | (2) | 2        | 101.180    | II  | 5 | (1) | 2  |
| 80.31 | III | 2        | (1)        | 2   | 88.81  | I        | 8          | (2, 2)       | 2   | 94.131   | III        | 5   | (2) | 2        | 101.181    | III | 5 | (1) | 2  |
| 80.32 | IV  | 2        | (2)        | 2*  | 88.82  | II       | 6          | (2)          | 2   | 94.132   | IV         | 4   | (1) | 4        | 101.182    | III | 4 | (2) | 2  |
| 81.33 | I   | 12       | (2, 2, 4)  | 1   | 88.83  | III      | 4          | (2)          | 2   | 94.133   | IV         | 5   | (2) | 2*       | 101.183    | III | 4 | (2) | 2  |
| 81.34 | II  | 8        | (2, 2)     | 1   | 88.84  | III      | 2          | (1)          | 2   | 94.134   | IV         | 4   | (1) | 2        | 101.184    | IV  | 5 | (1) | 2  |
| 81.35 | III | 4        | (1)        | 1   | 88.85  | III      | 6          | (2, 2)       | 2   | 95.135   | I          | 4   | (1) | 4        | 101.185    | IV  | 4 | (1) | 4  |
| 81.36 | IV  | 8        | (2, 2)     | 2   | 88.86  | IV       | 5          | (2, 2)       | 2*  | 95.136   | II         | 4   | (1) | 4        | 101.186    | IV  | 4 | (1) | 4  |
| 81.37 | IV  | 7        | (2, 2, 2)  | 2   | 89.87  | I        | 12         | (1)          | 1   | 95.137   | III        | 3   | (1) | 4        | 102.187    | I   | 4 | (1) | 2  |
| 81.38 | IV  | 7        | (2, 2)     | 2   | 89.88  | II       | 12         | (1)          | 1   | 95.138   | III        | 1   | (1) | 4        | 102.188    | II  | 4 | (1) | 2  |
| 82.39 | I   | 11       | (2, 2, 2)  | 1   | 89.89  | III      | 8          | (1)          | 1   | 95.139   | III        | 2   | (1) | 4        | 102.189    | III | 4 | (1) | 2  |
| 82.40 | II  | 7        | (2)        | 1   | 89.90  | III      | 8          | (4)          | 1   | 95.140   | IV         | 4   | (1) | 4        | 102.190    | III | 3 | (2) | 2  |
| 82.41 | III | 3        | (1)        | 1   | 89.91  | III      | 6          | (1)          | 1   | 95.141   | IV         | 3   | (2) | 4*       | 102.191    | III | 3 | (2) | 2  |
| 82.42 | IV  | 7        | (2, 2)     | 2   | 89.92  | IV       | 9          | (2)          | 2   | 95.142   | IV         | 3   | (1) | 4        | 102.192    | IV  | 4 | (1) | 4  |
| 83.43 | I   | 24       | (4, 4, 4)  | 1   | 89.93  | IV       | 8          | (1)          | 2   | 96.143   | I          | 2   | (1) | 4        | 102.193    | IV  | 4 | (1) | 4  |
| 83.44 | II  | 18       | (2, 2, 2)  | 1   | 89.94  | IV       | 7          | (2)          | 2   | 96.144   | II         | 2   | (1) | 4        | 102.194    | IV  | 4 | (1) | 2  |
| 83.45 | III | 12       | (1)        | 1   | 90.95  | I        | 7          | (1)          | 2   | 96.145   | III        | 1   | (1) | 4        | 103.195    | I   | 6 | (2) | 2  |
| 83.46 | III | 6        | (2)        | 1   | 90.96  | II       | 6          | (1)          | 2   | 96.146   | III        | 1   | (1) | 4        | 103.196    | II  | 6 | (2) | 2  |
| 83.47 | III | 8        | (2, 2)     | 1   | 90.97  | III      | 3          | (1)          | 2   | 96.147   | III        | 2   | (1) | 4        | 103.197    | III | 4 | (1) | 2  |
| 83.48 | IV  | 14       | (2, 4)     | 2   | 90.98  | III      | 5          | (4)          | 2   | 96.148   | IV         | 2   | (1) | 4        | 103.198    | III | 4 | (1) | 2  |
| 83.49 | IV  | 15       | (2, 2, 2)  | 2   | 90.99  | III      | 5          | (1)          | 2   | 96.149   | IV         | 2   | (2) | 4*       | 103.199    | III | 8 | (4) | 2  |
| 83.50 | IV  | 13       | (2, 4)     | 2   | 90.100 | IV       | 5          | (2)          | 4   | 96.150   | IV         | 2   | (1) | 4        | 103.200    | IV  | 6 | (2) | 2  |

(Continued from the previous page)

|         |     |          |         |     |                |         |     |                |         |     |                |
|---------|-----|----------|---------|-----|----------------|---------|-----|----------------|---------|-----|----------------|
| 103.201 | IV  | 4 (1) 4  | 111.251 | I   | 13 (1) 1       | 117.301 | III | 5 (1) 2        | 124.351 | I   | 17 (4) 2       |
| 103.202 | IV  | 4 (2) 4  | 111.252 | II  | 13 (1) 1       | 117.302 | III | 3 (1) 2        | 124.352 | II  | 15 (2) 2       |
| 104.203 | I   | 5 (2) 2  | 111.253 | III | 5 (1) 1        | 117.303 | III | 7 (2, 2, 4) 2  | 124.353 | III | 6 (2) 2        |
| 104.204 | II  | 4 (1) 2  | 111.254 | III | 8 (1) 1        | 117.304 | IV  | 6 (2) 4        | 124.354 | III | 9 (1) 2        |
| 104.205 | III | 3 (1) 2  | 111.255 | III | 12 (2, 2, 4) 1 | 117.305 | IV  | 9 (2) 2        | 124.355 | III | 10 (1) 2       |
| 104.206 | III | 3 (1) 2  | 111.256 | IV  | 9 (1) 2        | 117.306 | IV  | 6 (2) 4        | 124.356 | III | 8 (1) 2        |
| 104.207 | III | 5 (2) 2  | 111.257 | IV  | 8 (1) 2        | 118.307 | I   | 9 (2) 2        | 124.357 | III | 16 (4, 4) 2    |
| 104.208 | IV  | 4 (2) 4  | 111.258 | IV  | 8 (1) 2        | 118.308 | II  | 7 (1) 2        | 124.358 | III | 7 (1) 2        |
| 104.209 | IV  | 5 (2) 4  | 112.259 | I   | 12 (2) 2       | 118.309 | III | 5 (1) 2        | 124.359 | III | 9 (2) 2        |
| 104.210 | IV  | 5 (2) 2  | 112.260 | II  | 10 (1) 2       | 118.310 | III | 3 (1) 2        | 124.360 | IV  | 17 (4) 2       |
| 105.211 | I   | 6 (1) 2  | 112.261 | III | 4 (2) 2        | 118.311 | III | 7 (2, 2, 2) 2  | 124.361 | IV  | 11 (2) 4       |
| 105.212 | II  | 6 (1) 2  | 112.262 | III | 8 (1) 2        | 118.312 | IV  | 6 (2) 4        | 124.362 | IV  | 11 (4) 4       |
| 105.213 | III | 4 (2) 2  | 112.263 | III | 8 (2, 2, 2) 2  | 118.313 | IV  | 7 (2) 4        | 125.363 | I   | 13 (1) 2       |
| 105.214 | III | 6 (1) 2  | 112.264 | IV  | 10 (2) 2       | 118.314 | IV  | 8 (2) 2        | 125.364 | II  | 13 (1) 2       |
| 105.215 | III | 4 (2) 2  | 112.265 | IV  | 7 (2) 2*       | 119.315 | I   | 10 (1) 1       | 125.365 | III | 6 (1) 2        |
| 105.216 | IV  | 6 (1) 2  | 112.266 | IV  | 7 (2) 2        | 119.316 | II  | 10 (1) 1       | 125.366 | III | 8 (1) 2        |
| 105.217 | IV  | 4 (1) 4  | 113.267 | I   | 8 (1) 2        | 119.317 | III | 5 (1) 1        | 125.367 | III | 7 (1) 2        |
| 105.218 | IV  | 4 (1) 2  | 113.268 | II  | 6 (1) 2        | 119.318 | III | 4 (1) 1        | 125.368 | III | 8 (1) 2        |
| 106.219 | I   | 3 (2) 2* | 113.269 | III | 4 (1) 2        | 119.319 | III | 11 (2, 2, 2) 1 | 125.369 | III | 11 (2, 4) 2    |
| 106.220 | II  | 3 (1) 4  | 113.270 | III | 3 (1) 2        | 119.320 | IV  | 8 (1) 2        | 125.370 | III | 9 (2) 2        |
| 106.221 | III | 3 (2) 4  | 113.271 | III | 7 (2, 2, 4) 2  | 120.321 | I   | 9 (2) 2        | 125.371 | III | 8 (1) 2        |
| 106.222 | III | 3 (2) 2* | 113.272 | IV  | 6 (1) 4        | 120.322 | II  | 7 (1) 2        | 125.372 | IV  | 9 (1) 4        |
| 106.223 | III | 3 (2) 4  | 113.273 | IV  | 8 (1) 2        | 120.323 | III | 5 (1) 2        | 125.373 | IV  | 13 (1) 2       |
| 106.224 | IV  | 3 (1) 4  | 113.274 | IV  | 6 (1) 2        | 120.324 | III | 3 (2) 2        | 125.374 | IV  | 9 (1) 4        |
| 106.225 | IV  | 3 (2) 2* | 114.275 | I   | 7 (2) 2        | 120.325 | III | 7 (2, 2, 2) 2  | 126.375 | I   | 10 (2) 2       |
| 106.226 | IV  | 3 (1) 4  | 114.276 | II  | 5 (1) 2        | 120.326 | IV  | 9 (2) 2        | 126.376 | II  | 9 (1) 2        |
| 107.227 | I   | 6 (1) 1  | 114.277 | III | 3 (2) 2        | 121.327 | I   | 10 (1) 1       | 126.377 | III | 5 (2) 2        |
| 107.228 | II  | 6 (1) 1  | 114.278 | III | 3 (1) 2        | 121.328 | II  | 9 (1) 1        | 126.378 | III | 5 (1) 2        |
| 107.229 | III | 4 (1) 1  | 114.279 | III | 7 (2, 2, 2) 2  | 121.329 | III | 4 (1) 1        | 126.379 | III | 6 (1) 2        |
| 107.230 | III | 4 (1) 1  | 114.280 | IV  | 5 (2) 4        | 121.330 | III | 5 (1) 1        | 126.380 | III | 7 (1) 2        |
| 107.231 | III | 5 (2) 1  | 114.281 | IV  | 5 (2) 2*       | 121.331 | III | 9 (2, 2, 2) 1  | 126.381 | III | 8 (2, 2) 2     |
| 107.232 | IV  | 6 (1) 2  | 114.282 | IV  | 7 (2) 2        | 121.332 | IV  | 8 (1) 2        | 126.382 | III | 6 (2) 2        |
| 108.233 | I   | 5 (1) 2  | 115.283 | I   | 12 (1) 1       | 122.333 | I   | 7 (2) 2        | 126.383 | III | 7 (1) 2        |
| 108.234 | II  | 5 (1) 2  | 115.284 | II  | 12 (1) 1       | 122.334 | II  | 5 (1) 2        | 126.384 | IV  | 9 (2) 4        |
| 108.235 | III | 4 (1) 2  | 115.285 | III | 6 (1) 1        | 122.335 | III | 2 (1) 2        | 126.385 | IV  | 8 (2) 4        |
| 108.236 | III | 3 (1) 2  | 115.286 | III | 6 (1) 1        | 122.336 | III | 3 (1) 2        | 126.386 | IV  | 10 (2) 2       |
| 108.237 | III | 5 (4) 2  | 115.287 | III | 12 (2, 2, 4) 1 | 122.337 | III | 6 (2, 2) 2     | 127.387 | I   | 18 (1) 2       |
| 108.238 | IV  | 5 (1) 2  | 115.288 | IV  | 9 (1) 2        | 122.338 | IV  | 5 (2) 2*       | 127.388 | II  | 15 (1) 2       |
| 109.239 | I   | 3 (1) 2  | 115.289 | IV  | 8 (1) 2        | 123.339 | I   | 27 (1) 1       | 127.389 | III | 5 (1) 2        |
| 109.240 | II  | 3 (1) 2  | 115.290 | IV  | 7 (1) 2        | 123.340 | II  | 27 (1) 1       | 127.390 | III | 12 (1) 2       |
| 109.241 | III | 2 (1) 2  | 116.291 | I   | 10 (2) 2       | 123.341 | III | 9 (1) 1        | 127.391 | III | 9 (1) 2        |
| 109.242 | III | 3 (1) 2  | 116.292 | II  | 8 (1) 2        | 123.342 | III | 15 (1) 1       | 127.392 | III | 6 (1) 2        |
| 109.243 | III | 2 (1) 2  | 116.293 | III | 6 (1) 2        | 123.343 | III | 18 (1) 1       | 127.393 | III | 15 (4, 4, 4) 2 |
| 109.244 | IV  | 3 (1) 4  | 116.294 | III | 4 (2) 2        | 123.344 | III | 13 (1) 1       | 127.394 | III | 7 (1) 2        |
| 110.245 | I   | 2 (2) 2* | 116.295 | III | 8 (2, 2, 2) 2  | 123.345 | III | 24 (4, 4, 4) 1 | 127.395 | III | 6 (1) 2        |
| 110.246 | II  | 2 (1) 4  | 116.296 | IV  | 9 (2) 2        | 123.346 | III | 12 (1) 1       | 127.396 | IV  | 11 (1) 4       |
| 110.247 | III | 2 (2) 4  | 116.297 | IV  | 7 (2) 4        | 123.347 | III | 12 (1) 1       | 127.397 | IV  | 18 (1) 2       |
| 110.248 | III | 2 (2) 2* | 116.298 | IV  | 6 (2) 4        | 123.348 | IV  | 18 (1) 2       | 127.398 | IV  | 12 (1) 4       |
| 110.249 | III | 2 (2) 4  | 117.299 | I   | 9 (2) 2        | 123.349 | IV  | 18 (1) 2       | 128.399 | I   | 14 (4) 2       |
| 110.250 | IV  | 2 (2) 2* | 117.300 | II  | 7 (1) 2        | 123.350 | IV  | 15 (1) 2       | 128.400 | II  | 11 (2) 2       |

(Continued from the previous page)

|         |     |    |       |   |         |     |    |       |    |         |     |    |       |    |         |     |    |       |    |
|---------|-----|----|-------|---|---------|-----|----|-------|----|---------|-----|----|-------|----|---------|-----|----|-------|----|
| 128.401 | III | 4  | (2)   | 2 | 131.444 | IV  | 15 | (1)   | 2  | 135.487 | III | 6  | (1)   | 4  | 138.530 | IV  | 7  | (1)   | 4  |
| 128.402 | III | 8  | (1)   | 2 | 131.445 | IV  | 11 | (1)   | 4  | 135.488 | III | 5  | (2)   | 4  | 139.531 | I   | 18 | (1)   | 1  |
| 128.403 | III | 7  | (1)   | 2 | 131.446 | IV  | 12 | (1)   | 2  | 135.489 | III | 8  | (2,4) | 4  | 139.532 | II  | 18 | (1)   | 1  |
| 128.404 | III | 5  | (1)   | 2 | 132.447 | I   | 15 | (1)   | 2  | 135.490 | III | 6  | (2)   | 2* | 139.533 | III | 6  | (1)   | 1  |
| 128.405 | III | 13 | (4,4) | 2 | 132.448 | II  | 15 | (1)   | 2  | 135.491 | III | 4  | (1)   | 4  | 139.534 | III | 11 | (1)   | 1  |
| 128.406 | III | 6  | (1)   | 2 | 132.449 | III | 5  | (1)   | 2  | 135.492 | IV  | 8  | (1)   | 4  | 139.535 | III | 11 | (1)   | 1  |
| 128.407 | III | 5  | (1)   | 2 | 132.450 | III | 11 | (1)   | 2  | 135.493 | IV  | 9  | (1)   | 4  | 139.536 | III | 10 | (1)   | 1  |
| 128.408 | IV  | 10 | (4)   | 4 | 132.451 | III | 10 | (2)   | 2  | 135.494 | IV  | 9  | (1)   | 4  | 139.537 | III | 16 | (4,4) | 1  |
| 128.409 | IV  | 11 | (2)   | 4 | 132.452 | III | 9  | (1)   | 2  | 136.495 | I   | 12 | (1)   | 2  | 139.538 | III | 9  | (1)   | 1  |
| 128.410 | IV  | 14 | (4)   | 2 | 132.453 | III | 12 | (2,4) | 2  | 136.496 | II  | 11 | (1)   | 2  | 139.539 | III | 8  | (1)   | 1  |
| 129.411 | I   | 12 | (1)   | 2 | 132.454 | III | 10 | (2)   | 2  | 136.497 | III | 4  | (1)   | 2  | 139.540 | IV  | 15 | (1)   | 2  |
| 129.412 | II  | 12 | (1)   | 2 | 132.455 | III | 8  | (1)   | 2  | 136.498 | III | 10 | (1)   | 2  | 140.541 | I   | 15 | (1)   | 2  |
| 129.413 | III | 6  | (1)   | 2 | 132.456 | IV  | 14 | (1)   | 2  | 136.499 | III | 7  | (2)   | 2  | 140.542 | II  | 14 | (1)   | 2  |
| 129.414 | III | 8  | (1)   | 2 | 132.457 | IV  | 11 | (1)   | 4  | 136.500 | III | 6  | (1)   | 2  | 140.543 | III | 5  | (1)   | 2  |
| 129.415 | III | 6  | (1)   | 2 | 132.458 | IV  | 10 | (1)   | 4  | 136.501 | III | 9  | (2,4) | 2  | 140.544 | III | 10 | (1)   | 2  |
| 129.416 | III | 8  | (1)   | 2 | 133.459 | I   | 9  | (2)   | 2* | 136.502 | III | 7  | (2)   | 2  | 140.545 | III | 8  | (1)   | 2  |
| 129.417 | III | 11 | (2,4) | 2 | 133.460 | II  | 8  | (1)   | 4  | 136.503 | III | 5  | (1)   | 2  | 140.546 | III | 7  | (1)   | 2  |
| 129.418 | III | 8  | (1)   | 2 | 133.461 | III | 3  | (2)   | 2* | 136.504 | IV  | 9  | (1)   | 4  | 140.547 | III | 13 | (4,4) | 2  |
| 129.419 | III | 7  | (1)   | 2 | 133.462 | III | 5  | (2)   | 4  | 136.505 | IV  | 11 | (1)   | 4  | 140.548 | III | 8  | (1)   | 2  |
| 129.420 | IV  | 9  | (1)   | 4 | 133.463 | III | 6  | (2)   | 2* | 136.506 | IV  | 11 | (1)   | 2  | 140.549 | III | 7  | (2)   | 2  |
| 129.421 | IV  | 12 | (1)   | 2 | 133.464 | III | 7  | (2)   | 4  | 137.507 | I   | 8  | (1)   | 2  | 140.550 | IV  | 15 | (1)   | 2  |
| 129.422 | IV  | 9  | (1)   | 2 | 133.465 | III | 6  | (2,2) | 4  | 137.508 | II  | 8  | (1)   | 2  | 141.551 | I   | 9  | (1)   | 2  |
| 130.423 | I   | 8  | (2)   | 4 | 133.466 | III | 6  | (2,2) | 2* | 137.509 | III | 4  | (1)   | 2  | 141.552 | II  | 9  | (1)   | 2  |
| 130.424 | II  | 7  | (2)   | 4 | 133.467 | III | 6  | (1)   | 4  | 137.510 | III | 5  | (2)   | 2  | 141.553 | III | 3  | (1)   | 2  |
| 130.425 | III | 4  | (2)   | 4 | 133.468 | IV  | 8  | (1)   | 4  | 137.511 | III | 5  | (1)   | 2  | 141.554 | III | 5  | (2)   | 2  |
| 130.426 | III | 5  | (1)   | 4 | 133.469 | IV  | 9  | (2)   | 2* | 137.512 | III | 7  | (2)   | 2  | 141.555 | III | 6  | (1)   | 2  |
| 130.427 | III | 4  | (1)   | 4 | 133.470 | IV  | 7  | (1)   | 4  | 137.513 | III | 8  | (2,2) | 2  | 141.556 | III | 7  | (2)   | 2  |
| 130.428 | III | 5  | (1)   | 4 | 134.471 | I   | 12 | (1)   | 2  | 137.514 | III | 7  | (1)   | 2  | 141.557 | III | 8  | (2,2) | 2  |
| 130.429 | III | 8  | (2,4) | 4 | 134.472 | II  | 12 | (1)   | 2  | 137.515 | III | 4  | (1)   | 2  | 141.558 | III | 6  | (1)   | 2  |
| 130.430 | III | 6  | (1)   | 4 | 134.473 | III | 4  | (1)   | 2  | 137.516 | IV  | 7  | (1)   | 4  | 141.559 | III | 4  | (1)   | 2  |
| 130.431 | III | 6  | (2)   | 4 | 134.474 | III | 8  | (1)   | 2  | 137.517 | IV  | 7  | (1)   | 4  | 141.560 | IV  | 7  | (1)   | 4  |
| 130.432 | IV  | 8  | (2)   | 4 | 134.475 | III | 7  | (2)   | 2  | 137.518 | IV  | 8  | (1)   | 2  | 142.561 | I   | 7  | (2)   | 2* |
| 130.433 | IV  | 7  | (1)   | 4 | 134.476 | III | 8  | (1)   | 2  | 138.519 | I   | 10 | (1)   | 4  | 142.562 | II  | 6  | (1)   | 4  |
| 130.434 | IV  | 8  | (2)   | 4 | 134.477 | III | 9  | (2,2) | 2  | 138.520 | II  | 9  | (1)   | 4  | 142.563 | III | 2  | (2)   | 2* |
| 131.435 | I   | 18 | (1)   | 2 | 134.478 | III | 9  | (2,2) | 2  | 138.521 | III | 4  | (1)   | 4  | 142.564 | III | 4  | (2)   | 4  |
| 131.436 | II  | 18 | (1)   | 2 | 134.479 | III | 7  | (1)   | 2  | 138.522 | III | 8  | (1)   | 4  | 142.565 | III | 4  | (2)   | 2* |
| 131.437 | III | 6  | (1)   | 2 | 134.480 | IV  | 8  | (1)   | 4  | 138.523 | III | 5  | (2)   | 4  | 142.566 | III | 5  | (2,2) | 4  |
| 131.438 | III | 10 | (2)   | 2 | 134.481 | IV  | 10 | (1)   | 4  | 138.524 | III | 6  | (1)   | 4  | 142.567 | III | 5  | (2,2) | 4  |
| 131.439 | III | 15 | (1)   | 2 | 134.482 | IV  | 10 | (1)   | 2  | 138.525 | III | 7  | (2,2) | 4  | 142.568 | III | 5  | (2)   | 2* |
| 131.440 | III | 12 | (2)   | 2 | 135.483 | I   | 9  | (1)   | 4  | 138.526 | III | 7  | (2)   | 4  | 142.569 | III | 4  | (2)   | 4  |
| 131.441 | III | 13 | (2,4) | 2 | 135.484 | II  | 8  | (1)   | 4  | 138.527 | III | 5  | (1)   | 4  | 142.570 | IV  | 7  | (2)   | 2* |
| 131.442 | III | 9  | (1)   | 2 | 135.485 | III | 3  | (2)   | 2* | 138.528 | IV  | 8  | (1)   | 4  |         |     |    |       |    |
| 131.443 | III | 9  | (1)   | 2 | 135.486 | III | 7  | (2)   | 4  | 138.529 | IV  | 10 | (1)   | 4  |         |     |    |       |    |

 $d$ : Rank of the band structure group {BS} $X_{BS}$ : Symmetry-based indicators of band topology $\nu_{BS}$ : Set of  $\nu$  bands are symmetry-forbidden from being isolated by band gaps if  $\nu \notin \nu_{BS} \mathbb{Z}$ 

\*: Exhibiting exceptional filling pattern; see table S19



Table S17. Characterization of MSGs in the hexagonal family for spinless electrons.

| MSG    | $d$ | $X_{BS}$ | $\nu_{BS}$ | MSG | $d$     | $X_{BS}$ | $\nu_{BS}$ | MSG     | $d$ | $X_{BS}$ | $\nu_{BS}$ | MSG | $d$       | $X_{BS}$ | $\nu_{BS}$ |     |   |     |   |
|--------|-----|----------|------------|-----|---------|----------|------------|---------|-----|----------|------------|-----|-----------|----------|------------|-----|---|-----|---|
| 143.1  | I   | 7        | (3)        | 1   | 156.51  | III      | 7          | (3)     | 1   | 166.101  | III        | 11  | (2, 4)    | 1        | 177.151    | III | 5 | (1) | 1 |
| 143.2  | II  | 4        | (1)        | 1   | 156.52  | IV       | 5          | (1)     | 2   | 166.102  | IV         | 7   | (2)       | 2        | 177.152    | III | 6 | (1) | 1 |
| 143.3  | IV  | 4        | (1)        | 2   | 157.53  | I        | 5          | (1)     | 1   | 167.103  | I          | 7   | (2)       | 2        | 177.153    | III | 9 | (6) | 1 |
| 144.4  | I   | 1        | (1)        | 3   | 157.54  | II       | 4          | (1)     | 1   | 167.104  | II         | 6   | (2)       | 2        | 177.154    | IV  | 8 | (2) | 2 |
| 144.5  | II  | 1        | (1)        | 3   | 157.55  | III      | 5          | (3)     | 1   | 167.105  | III        | 2   | (1)       | 2        | 178.155    | I   | 3 | (1) | 6 |
| 144.6  | IV  | 1        | (1)        | 6   | 157.56  | IV       | 4          | (1)     | 2   | 167.106  | III        | 3   | (1)       | 2        | 178.156    | II  | 3 | (1) | 6 |
| 145.7  | I   | 1        | (1)        | 3   | 158.57  | I        | 4          | (1)     | 2   | 167.107  | III        | 7   | (4)       | 2        | 178.157    | III | 2 | (1) | 6 |
| 145.8  | II  | 1        | (1)        | 3   | 158.58  | II       | 4          | (1)     | 2   | 167.108  | IV         | 7   | (2)       | 2        | 178.158    | III | 2 | (1) | 6 |
| 145.9  | IV  | 1        | (1)        | 6   | 158.59  | III      | 7          | (3)     | 2   | 168.109  | I          | 9   | (6)       | 1        | 178.159    | III | 1 | (1) | 6 |
| 146.10 | I   | 3        | (1)        | 1   | 158.60  | IV       | 4          | (1)     | 2   | 168.110  | II         | 6   | (2)       | 1        | 178.160    | IV  | 3 | (1) | 6 |
| 146.11 | II  | 2        | (1)        | 1   | 159.61  | I        | 4          | (1)     | 2   | 168.111  | III        | 4   | (1)       | 1        | 179.161    | I   | 3 | (1) | 6 |
| 146.12 | IV  | 2        | (1)        | 2   | 159.62  | II       | 3          | (1)     | 2   | 168.112  | IV         | 6   | (2)       | 2        | 179.162    | II  | 3 | (1) | 6 |
| 147.13 | I   | 13       | (2, 12)    | 1   | 159.63  | III      | 5          | (3)     | 2   | 169.113  | I          | 1   | (1)       | 6        | 179.163    | III | 2 | (1) | 6 |
| 147.14 | II  | 9        | (2, 4)     | 1   | 159.64  | IV       | 3          | (1)     | 2   | 169.114  | II         | 1   | (1)       | 6        | 179.164    | III | 2 | (1) | 6 |
| 147.15 | III | 4        | (1)        | 1   | 160.65  | I        | 3          | (1)     | 1   | 169.115  | III        | 1   | (1)       | 6        | 179.165    | III | 1 | (1) | 6 |
| 147.16 | IV  | 7        | (4)        | 2   | 160.66  | II       | 3          | (1)     | 1   | 169.116  | IV         | 1   | (1)       | 6        | 179.166    | IV  | 3 | (1) | 6 |
| 148.17 | I   | 11       | (2, 4)     | 1   | 160.67  | III      | 3          | (1)     | 1   | 170.117  | I          | 1   | (1)       | 6        | 180.167    | I   | 7 | (1) | 3 |
| 148.18 | II  | 8        | (2, 4)     | 1   | 160.68  | IV       | 3          | (1)     | 2   | 170.118  | II         | 1   | (1)       | 6        | 180.168    | II  | 7 | (1) | 3 |
| 148.19 | III | 2        | (1)        | 1   | 161.69  | I        | 2          | (1)     | 2   | 170.119  | III        | 1   | (1)       | 6        | 180.169    | III | 3 | (1) | 3 |
| 148.20 | IV  | 6        | (4)        | 2   | 161.70  | II       | 2          | (1)     | 2   | 170.120  | IV         | 1   | (1)       | 6        | 180.170    | III | 3 | (1) | 3 |
| 149.21 | I   | 6        | (1)        | 1   | 161.71  | III      | 3          | (1)     | 2   | 171.121  | I          | 3   | (2)       | 3        | 180.171    | III | 3 | (2) | 3 |
| 149.22 | II  | 6        | (1)        | 1   | 161.72  | IV       | 2          | (1)     | 2   | 171.122  | II         | 3   | (2)       | 3        | 180.172    | IV  | 5 | (2) | 6 |
| 149.23 | III | 7        | (3)        | 1   | 162.73  | I        | 12         | (2)     | 1   | 171.123  | III        | 1   | (1)       | 3        | 181.173    | I   | 7 | (1) | 3 |
| 149.24 | IV  | 5        | (1)        | 2   | 162.74  | II       | 12         | (2)     | 1   | 171.124  | IV         | 3   | (2)       | 6        | 181.174    | II  | 7 | (1) | 3 |
| 150.25 | I   | 6        | (1)        | 1   | 162.75  | III      | 5          | (1)     | 1   | 172.125  | I          | 3   | (2)       | 3        | 181.175    | III | 3 | (1) | 3 |
| 150.26 | II  | 5        | (1)        | 1   | 162.76  | III      | 5          | (1)     | 1   | 172.126  | II         | 3   | (2)       | 3        | 181.176    | III | 3 | (1) | 3 |
| 150.27 | III | 5        | (3)        | 1   | 162.77  | III      | 13         | (2, 12) | 1   | 172.127  | III        | 1   | (1)       | 3        | 181.177    | III | 3 | (2) | 3 |
| 150.28 | IV  | 4        | (1)        | 2   | 162.78  | IV       | 8          | (2)     | 2   | 172.128  | IV         | 3   | (2)       | 6        | 181.178    | IV  | 5 | (2) | 6 |
| 151.29 | I   | 3        | (1)        | 3   | 163.79  | I        | 8          | (2)     | 2   | 173.129  | I          | 5   | (3)       | 2        | 182.179    | I   | 5 | (1) | 2 |
| 151.30 | II  | 3        | (1)        | 3   | 163.80  | II       | 7          | (2)     | 2   | 173.130  | II         | 3   | (1)       | 2        | 182.180    | II  | 5 | (1) | 2 |
| 151.31 | III | 1        | (1)        | 3   | 163.81  | III      | 4          | (1)     | 2   | 173.131  | III        | 4   | (1)       | 2        | 182.181    | III | 4 | (1) | 2 |
| 151.32 | IV  | 2        | (1)        | 6   | 163.82  | III      | 4          | (1)     | 2   | 173.132  | IV         | 3   | (1)       | 2        | 182.182    | III | 5 | (1) | 2 |
| 152.33 | I   | 3        | (1)        | 3   | 163.83  | III      | 9          | (12)    | 2   | 174.133  | I          | 21  | (3, 3, 3) | 1        | 182.183    | III | 5 | (3) | 2 |
| 152.34 | II  | 3        | (1)        | 3   | 163.84  | IV       | 8          | (2)     | 2   | 174.134  | II         | 12  | (1)       | 1        | 182.184    | IV  | 5 | (1) | 2 |
| 152.35 | III | 1        | (1)        | 3   | 164.85  | I        | 12         | (2)     | 1   | 174.135  | III        | 4   | (1)       | 1        | 183.185    | I   | 8 | (1) | 1 |
| 152.36 | IV  | 2        | (1)        | 6   | 164.86  | II       | 12         | (2)     | 1   | 174.136  | IV         | 11  | (3)       | 2        | 183.186    | II  | 8 | (1) | 1 |
| 153.37 | I   | 3        | (1)        | 3   | 164.87  | III      | 4          | (1)     | 1   | 175.137  | I          | 27  | (6, 6, 6) | 1        | 183.187    | III | 5 | (1) | 1 |
| 153.38 | II  | 3        | (1)        | 3   | 164.88  | III      | 6          | (1)     | 1   | 175.138  | II         | 18  | (2, 2, 2) | 1        | 183.188    | III | 4 | (1) | 1 |
| 153.39 | III | 1        | (1)        | 3   | 164.89  | III      | 13         | (2, 12) | 1   | 175.139  | III        | 12  | (1)       | 1        | 183.189    | III | 9 | (6) | 1 |
| 153.40 | IV  | 2        | (1)        | 6   | 164.90  | IV       | 8          | (2)     | 2   | 175.140  | III        | 6   | (2)       | 1        | 183.190    | IV  | 8 | (1) | 2 |
| 154.41 | I   | 3        | (1)        | 3   | 165.91  | I        | 8          | (2)     | 2   | 175.141  | III        | 9   | (2, 4)    | 1        | 184.191    | I   | 6 | (2) | 2 |
| 154.42 | II  | 3        | (1)        | 3   | 165.92  | II       | 7          | (2)     | 2   | 175.142  | IV         | 15  | (2, 6)    | 2        | 184.192    | II  | 6 | (2) | 2 |
| 154.43 | III | 1        | (1)        | 3   | 165.93  | III      | 3          | (1)     | 2   | 176.143  | I          | 16  | (3, 6)    | 2        | 184.193    | III | 4 | (1) | 2 |
| 154.44 | IV  | 2        | (1)        | 6   | 165.94  | III      | 5          | (1)     | 2   | 176.144  | II         | 10  | (2)       | 2        | 184.194    | III | 3 | (1) | 2 |
| 155.45 | I   | 4        | (1)        | 1   | 165.95  | III      | 9          | (12)    | 2   | 176.145  | III        | 11  | (3)       | 2        | 184.195    | III | 9 | (6) | 2 |
| 155.46 | II  | 4        | (1)        | 1   | 165.96  | IV       | 8          | (2)     | 2   | 176.146  | III        | 3   | (1)       | 2        | 184.196    | IV  | 6 | (2) | 2 |
| 155.47 | III | 3        | (1)        | 1   | 166.97  | I        | 11         | (2)     | 1   | 176.147  | III        | 7   | (4)       | 2        | 185.197    | I   | 4 | (1) | 2 |
| 155.48 | IV  | 3        | (1)        | 2   | 166.98  | II       | 11         | (2)     | 1   | 176.148  | IV         | 10  | (2)       | 2        | 185.198    | II  | 4 | (1) | 2 |
| 156.49 | I   | 5        | (1)        | 1   | 166.99  | III      | 3          | (1)     | 1   | 177.149  | I          | 10  | (1)       | 1        | 185.199    | III | 5 | (1) | 2 |
| 156.50 | II  | 5        | (1)        | 1   | 166.100 | III      | 4          | (1)     | 1   | 177.150  | II         | 10  | (1)       | 1        | 185.200    | III | 3 | (1) | 2 |

(Continued from the previous page)

|             |    |           |   |             |    |           |   |             |    |           |   |             |    |        |   |
|-------------|----|-----------|---|-------------|----|-----------|---|-------------|----|-----------|---|-------------|----|--------|---|
| 185.201 III | 5  | (3)       | 2 | 188.219 III | 14 | (3, 3)    | 2 | 191.237 III | 12 | (1)       | 1 | 193.255 III | 4  | (1)    | 2 |
| 185.202 IV  | 4  | (1)       | 2 | 188.220 IV  | 12 | (3)       | 2 | 191.238 III | 12 | (2)       | 1 | 193.256 III | 10 | (1)    | 2 |
| 186.203 I   | 4  | (1)       | 2 | 189.221 I   | 15 | (1)       | 1 | 191.239 III | 12 | (2)       | 1 | 193.257 III | 9  | (3)    | 2 |
| 186.204 II  | 4  | (1)       | 2 | 189.222 II  | 12 | (1)       | 1 | 191.240 III | 27 | (6, 6, 6) | 1 | 193.258 III | 8  | (2)    | 2 |
| 186.205 III | 4  | (1)       | 2 | 189.223 III | 4  | (1)       | 1 | 191.241 III | 10 | (1)       | 1 | 193.259 III | 8  | (2)    | 2 |
| 186.206 III | 4  | (1)       | 2 | 189.224 III | 5  | (1)       | 1 | 191.242 IV  | 16 | (1)       | 2 | 193.260 III | 14 | (3, 6) | 2 |
| 186.207 III | 5  | (3)       | 2 | 189.225 III | 15 | (3, 3, 3) | 1 | 192.243 I   | 17 | (6)       | 2 | 193.261 III | 5  | (1)    | 2 |
| 186.208 IV  | 4  | (1)       | 2 | 189.226 IV  | 9  | (1)       | 2 | 192.244 II  | 14 | (2)       | 2 | 193.262 IV  | 13 | (1)    | 2 |
| 187.209 I   | 15 | (1)       | 1 | 190.227 I   | 12 | (3)       | 2 | 192.245 III | 6  | (2)       | 2 | 194.263 I   | 13 | (1)    | 2 |
| 187.210 II  | 15 | (1)       | 1 | 190.228 II  | 8  | (1)       | 2 | 192.246 III | 9  | (1)       | 2 | 194.264 II  | 13 | (1)    | 2 |
| 187.211 III | 6  | (1)       | 1 | 190.229 III | 3  | (1)       | 2 | 192.247 III | 8  | (1)       | 2 | 194.265 III | 4  | (1)    | 2 |
| 187.212 III | 5  | (1)       | 1 | 190.230 III | 4  | (1)       | 2 | 192.248 III | 7  | (2)       | 2 | 194.266 III | 12 | (3)    | 2 |
| 187.213 III | 21 | (3, 3, 3) | 1 | 190.231 III | 12 | (3, 3)    | 2 | 192.249 III | 7  | (2)       | 2 | 194.267 III | 9  | (1)    | 2 |
| 187.214 IV  | 10 | (1)       | 2 | 190.232 IV  | 9  | (3)       | 2 | 192.250 III | 18 | (6, 6)    | 2 | 194.268 III | 8  | (2)    | 2 |
| 188.215 I   | 12 | (3)       | 2 | 191.233 I   | 24 | (1)       | 1 | 192.251 III | 8  | (2)       | 2 | 194.269 III | 8  | (2)    | 2 |
| 188.216 II  | 9  | (1)       | 2 | 191.234 II  | 24 | (1)       | 1 | 192.252 IV  | 17 | (6)       | 2 | 194.270 III | 16 | (3, 6) | 2 |
| 188.217 III | 5  | (1)       | 2 | 191.235 III | 8  | (1)       | 1 | 193.253 I   | 13 | (1)       | 2 | 194.271 III | 5  | (1)    | 2 |
| 188.218 III | 4  | (1)       | 2 | 191.236 III | 15 | (1)       | 1 | 193.254 II  | 12 | (1)       | 2 | 194.272 IV  | 12 | (1)    | 2 |

$d$ : Rank of the band structure group  $\{\text{BS}\}$

$X_{\text{BS}}$ : Symmetry-based indicators of band topology

$\nu_{\text{BS}}$ : Set of  $\nu$  bands are symmetry-forbidden from being isolated by band gaps if  $\nu \notin \nu_{\text{BS}} \mathbb{Z}$

Table S18. Characterization of MSGs in the cubic family for spinless electrons.

| MSG    | $d$ | $X_{BS}$ | $\nu_{BS}$ | MSG | $d$    | $X_{BS}$ | $\nu_{BS}$ | MSG | $d$ | $X_{BS}$ | $\nu_{BS}$ | MSG | $d$ | $X_{BS}$ | $\nu_{BS}$ |     |    |     |    |
|--------|-----|----------|------------|-----|--------|----------|------------|-----|-----|----------|------------|-----|-----|----------|------------|-----|----|-----|----|
| 195.1  | I   | 7        | (1)        | 1   | 206.39 | III      | 3          | (1) | 4   | 216.77   | IV         | 7   | (1) | 2        | 224.115    | IV  | 10 | (1) | 2  |
| 195.2  | II  | 6        | (1)        | 1   | 207.40 | I        | 9          | (1) | 1   | 217.78   | I          | 9   | (1) | 1        | 225.116    | I   | 17 | (1) | 1  |
| 195.3  | IV  | 4        | (2)        | 2   | 207.41 | II       | 9          | (1) | 1   | 217.79   | II         | 8   | (1) | 1        | 225.117    | II  | 17 | (1) | 1  |
| 196.4  | I   | 5        | (1)        | 1   | 207.42 | III      | 6          | (1) | 1   | 217.80   | III        | 5   | (1) | 1        | 225.118    | III | 8  | (1) | 1  |
| 196.5  | II  | 4        | (1)        | 1   | 207.43 | IV       | 6          | (2) | 2   | 218.81   | I          | 9   | (2) | 2        | 225.119    | III | 13 | (1) | 1  |
| 196.6  | IV  | 4        | (2)        | 2   | 208.44 | I        | 7          | (1) | 2   | 218.82   | II         | 7   | (1) | 2        | 225.120    | III | 7  | (1) | 1  |
| 197.7  | I   | 5        | (1)        | 1   | 208.45 | II       | 7          | (1) | 2   | 218.83   | III        | 6   | (1) | 2        | 225.121    | IV  | 13 | (1) | 2  |
| 197.8  | II  | 4        | (1)        | 1   | 208.46 | III      | 6          | (2) | 2   | 218.84   | IV         | 6   | (2) | 2        | 226.122    | I   | 14 | (1) | 2  |
| 198.9  | I   | 3        | (1)        | 4   | 208.47 | IV       | 5          | (1) | 2   | 219.85   | I          | 8   | (2) | 2        | 226.123    | II  | 12 | (1) | 2  |
| 198.10 | II  | 2        | (1)        | 4   | 209.48 | I        | 7          | (1) | 1   | 219.86   | II         | 6   | (1) | 2        | 226.124    | III | 7  | (1) | 2  |
| 198.11 | IV  | 2        | (1)        | 4*  | 209.49 | II       | 7          | (1) | 1   | 219.87   | III        | 5   | (1) | 2        | 226.125    | III | 10 | (1) | 2  |
| 199.12 | I   | 4        | (1)        | 2*  | 209.50 | III      | 5          | (1) | 1   | 219.88   | IV         | 8   | (2) | 2        | 226.126    | III | 6  | (2) | 2  |
| 199.13 | II  | 3        | (1)        | 2*  | 209.51 | IV       | 6          | (1) | 2   | 220.89   | I          | 7   | (2) | 2*       | 226.127    | IV  | 14 | (1) | 2  |
| 200.14 | I   | 17       | (1)        | 1   | 210.52 | I        | 4          | (1) | 2   | 220.90   | II         | 5   | (1) | 2*       | 227.128    | I   | 11 | (1) | 2  |
| 200.15 | II  | 14       | (1)        | 1   | 210.53 | II       | 4          | (1) | 2   | 220.91   | III        | 4   | (1) | 2*       | 227.129    | II  | 11 | (1) | 2  |
| 200.16 | III | 6        | (1)        | 1   | 210.54 | III      | 4          | (1) | 2   | 221.92   | I          | 22  | (1) | 1        | 227.130    | III | 6  | (1) | 2  |
| 200.17 | IV  | 9        | (1)        | 2   | 210.55 | IV       | 4          | (2) | 2*  | 221.93   | II         | 22  | (1) | 1        | 227.131    | III | 10 | (2) | 2  |
| 201.18 | I   | 11       | (2)        | 2   | 211.56 | I        | 7          | (1) | 1   | 221.94   | III        | 10  | (1) | 1        | 227.132    | III | 4  | (1) | 2  |
| 201.19 | II  | 8        | (2)        | 2   | 211.57 | II       | 7          | (1) | 1   | 221.95   | III        | 16  | (1) | 1        | 227.133    | IV  | 8  | (1) | 4  |
| 201.20 | III | 4        | (2)        | 2   | 211.58 | III      | 5          | (1) | 1   | 221.96   | III        | 9   | (1) | 1        | 228.134    | I   | 9  | (2) | 2* |
| 201.21 | IV  | 7        | (2)        | 2   | 212.59 | I        | 3          | (1) | 4   | 221.97   | IV         | 13  | (1) | 2        | 228.135    | II  | 7  | (1) | 4  |
| 202.22 | I   | 13       | (1)        | 1   | 212.60 | II       | 3          | (1) | 4   | 222.98   | I          | 11  | (2) | 2        | 228.136    | III | 5  | (2) | 2* |
| 202.23 | II  | 10       | (1)        | 1   | 212.61 | III      | 3          | (1) | 4   | 222.99   | II         | 9   | (1) | 2        | 228.137    | III | 7  | (2) | 4  |
| 202.24 | III | 4        | (2)        | 1   | 212.62 | IV       | 3          | (1) | 4*  | 222.100  | III        | 6   | (1) | 2        | 228.138    | III | 4  | (2) | 4  |
| 202.25 | IV  | 9        | (1)        | 2   | 213.63 | I        | 3          | (1) | 4   | 222.101  | III        | 8   | (1) | 2        | 228.139    | IV  | 9  | (2) | 2* |
| 203.26 | I   | 10       | (2)        | 2   | 213.64 | II       | 3          | (1) | 4   | 222.102  | III        | 6   | (1) | 2        | 229.140    | I   | 17 | (1) | 1  |
| 203.27 | II  | 7        | (2)        | 2   | 213.65 | III      | 3          | (1) | 4   | 222.103  | IV         | 11  | (2) | 2        | 229.141    | II  | 17 | (1) | 1  |
| 203.28 | III | 3        | (1)        | 2   | 213.66 | IV       | 3          | (1) | 4*  | 223.104  | I          | 13  | (1) | 2        | 229.142    | III | 9  | (1) | 1  |
| 203.29 | IV  | 6        | (2, 2)     | 2*  | 214.67 | I        | 5          | (1) | 2*  | 223.105  | II         | 12  | (1) | 2        | 229.143    | III | 13 | (1) | 1  |
| 204.30 | I   | 13       | (1)        | 1   | 214.68 | II       | 5          | (1) | 2*  | 223.106  | III        | 9   | (2) | 2        | 229.144    | III | 7  | (1) | 1  |
| 204.31 | II  | 10       | (1)        | 1   | 214.69 | III      | 4          | (1) | 2*  | 223.107  | III        | 11  | (1) | 2        | 230.145    | I   | 9  | (2) | 2* |
| 204.32 | III | 4        | (1)        | 1   | 215.70 | I        | 10         | (1) | 1   | 223.108  | III        | 6   | (1) | 2        | 230.146    | II  | 7  | (1) | 4* |
| 205.33 | I   | 9        | (2)        | 4   | 215.71 | II       | 10         | (1) | 1   | 223.109  | IV         | 11  | (1) | 2        | 230.147    | III | 5  | (2) | 4* |
| 205.34 | II  | 6        | (1)        | 4   | 215.72 | III      | 6          | (1) | 1   | 224.110  | I          | 13  | (1) | 2        | 230.148    | III | 7  | (2) | 2* |
| 205.35 | III | 2        | (1)        | 4   | 215.73 | IV       | 7          | (1) | 2   | 224.111  | II         | 13  | (1) | 2        | 230.149    | III | 4  | (1) | 4* |
| 205.36 | IV  | 5        | (2)        | 4*  | 216.74 | I        | 9          | (1) | 1   | 224.112  | III        | 7   | (1) | 2        |            |     |    |     |    |
| 206.37 | I   | 10       | (2)        | 2*  | 216.75 | II       | 9          | (1) | 1   | 224.113  | III        | 11  | (2) | 2        |            |     |    |     |    |
| 206.38 | II  | 7        | (1)        | 4   | 216.76 | III      | 5          | (1) | 1   | 224.114  | III        | 6   | (1) | 2        |            |     |    |     |    |

$d$ : Rank of the band structure group {BS}

$X_{BS}$ : Symmetry-based indicators of band topology

$\nu_{BS}$ : Set of  $\nu$  bands are symmetry-forbidden from being isolated by band gaps if  $\nu \notin \nu_{BS} \mathbb{Z}$

\*: Exhibiting exceptional filling pattern; see table S19

Table S19. MSGs for which spinless electrons exhibit exceptional filling patterns.

| MSG        | $\{\nu\}_{AI}$ | $\{\nu\}_{BS}$                | MSG         | $\{\nu\}_{AI}$ | $\{\nu\}_{BS}$                | MSG         | $\{\nu\}_{AI}$                | $\{\nu\}_{BS}$                | MSG         | $\{\nu\}_{AI}$                       | $\{\nu\}_{BS}$                       |
|------------|----------------|-------------------------------|-------------|----------------|-------------------------------|-------------|-------------------------------|-------------------------------|-------------|--------------------------------------|--------------------------------------|
| 9.41 IV    | $4\mathbb{N}$  | $2\mathbb{N}$                 | 80.32 IV    | $4\mathbb{N}$  | $2\mathbb{N}$                 | 133.459 I   | $4\mathbb{N}$                 | $2\mathbb{N} \setminus \{2\}$ | 212.62 IV   | $4\mathbb{N} \setminus \{4\}$        | $4\mathbb{N}$                        |
| 15.91 IV   | $4\mathbb{N}$  | $2\mathbb{N}$                 | 86.73 IV    | $4\mathbb{N}$  | $2\mathbb{N}$                 | 133.461 III | $4\mathbb{N}$                 | $2\mathbb{N}$                 | 213.66 IV   | $4\mathbb{N} \setminus \{4\}$        | $4\mathbb{N}$                        |
| 29.105 IV  | $8\mathbb{N}$  | $4\mathbb{N}$                 | 88.86 IV    | $4\mathbb{N}$  | $2\mathbb{N}$                 | 133.463 III | $4\mathbb{N}$                 | $2\mathbb{N} \setminus \{2\}$ | 214.67 I    | $2\mathbb{N} \setminus \{2\}$        | –                                    |
| 37.185 IV  | $4\mathbb{N}$  | $2\mathbb{N}$                 | 91.109 IV   | $8\mathbb{N}$  | $4\mathbb{N}$                 | 133.466 III | $4\mathbb{N}$                 | $2\mathbb{N}$                 | 214.68 II   | $2\mathbb{N} \setminus \{2\}$        | –                                    |
| 41.217 IV  | $4\mathbb{N}$  | $2\mathbb{N}$                 | 92.117 IV   | $8\mathbb{N}$  | $4\mathbb{N}$                 | 133.469 IV  | $4\mathbb{N}$                 | $2\mathbb{N} \setminus \{2\}$ | 214.69 III  | $2\mathbb{N} \setminus \{2\}$        | –                                    |
| 43.228 IV  | $4\mathbb{N}$  | $2\mathbb{N}$                 | 93.125 IV   | $4\mathbb{N}$  | $2\mathbb{N} \setminus \{2\}$ | 135.485 III | $4\mathbb{N}$                 | $2\mathbb{N}$                 | 220.89 I    | $2\mathbb{N} \setminus \{2, 4, 10\}$ | $2\mathbb{N} \setminus \{2\}$        |
| 45.240 IV  | $4\mathbb{N}$  | $2\mathbb{N}$                 | 94.133 IV   | $4\mathbb{N}$  | $2\mathbb{N}$                 | 135.490 III | $4\mathbb{N}$                 | $2\mathbb{N} \setminus \{2\}$ | 220.90 II   | $2\mathbb{N} \setminus \{2, 4, 10\}$ | –                                    |
| 54.347 IV  | $8\mathbb{N}$  | $4\mathbb{N}$                 | 95.141 IV   | $8\mathbb{N}$  | $4\mathbb{N}$                 | 142.561 I   | $4\mathbb{N}$                 | $2\mathbb{N} \setminus \{2\}$ | 220.91 III  | $2\mathbb{N} \setminus \{2, 4, 10\}$ | –                                    |
| 60.426 IV  | $8\mathbb{N}$  | $4\mathbb{N}$                 | 96.149 IV   | $8\mathbb{N}$  | $4\mathbb{N}$                 | 142.563 III | $4\mathbb{N}$                 | $2\mathbb{N}$                 | 228.134 I   | $4\mathbb{N}$                        | $2\mathbb{N} \setminus \{2\}$        |
| 61.438 IV  | $8\mathbb{N}$  | $4\mathbb{N}$                 | 98.162 IV   | $4\mathbb{N}$  | $2\mathbb{N}$                 | 142.565 III | $4\mathbb{N}$                 | $2\mathbb{N} \setminus \{2\}$ | 228.136 III | $4\mathbb{N}$                        | $2\mathbb{N} \setminus \{2\}$        |
| 61.440 IV  | $8\mathbb{N}$  | $4\mathbb{N}$                 | 106.219 I   | $4\mathbb{N}$  | $2\mathbb{N}$                 | 142.568 III | $4\mathbb{N}$                 | $2\mathbb{N} \setminus \{2\}$ | 228.139 IV  | $4\mathbb{N}$                        | $2\mathbb{N} \setminus \{2\}$        |
| 68.519 IV  | $4\mathbb{N}$  | $2\mathbb{N}$                 | 106.222 III | $4\mathbb{N}$  | $2\mathbb{N}$                 | 142.570 IV  | $4\mathbb{N}$                 | $2\mathbb{N} \setminus \{2\}$ | 230.145 I   | $4\mathbb{N} \setminus \{4\}$        | $2\mathbb{N} \setminus \{2, 4\}$     |
| 70.532 IV  | $4\mathbb{N}$  | $2\mathbb{N}$                 | 106.225 IV  | $4\mathbb{N}$  | $2\mathbb{N}$                 | 198.11 IV   | $4\mathbb{N} \setminus \{4\}$ | $4\mathbb{N}$                 | 230.146 II  | $4\mathbb{N} \setminus \{4\}$        | –                                    |
| 73.548 I   | $4\mathbb{N}$  | $2\mathbb{N} \setminus \{2\}$ | 110.245 I   | $4\mathbb{N}$  | $2\mathbb{N}$                 | 199.12 I    | $2\mathbb{N} \setminus \{2\}$ | –                             | 230.147 III | $4\mathbb{N} \setminus \{4\}$        | $4\mathbb{N}$                        |
| 73.550 III | $4\mathbb{N}$  | $2\mathbb{N}$                 | 110.248 III | $4\mathbb{N}$  | $2\mathbb{N}$                 | 199.13 II   | $2\mathbb{N} \setminus \{2\}$ | –                             | 230.148 III | $4\mathbb{N} \setminus \{4\}$        | $2\mathbb{N} \setminus \{2, 4, 10\}$ |
| 73.553 IV  | $4\mathbb{N}$  | $2\mathbb{N} \setminus \{2\}$ | 110.250 IV  | $4\mathbb{N}$  | $2\mathbb{N}$                 | 203.29 IV   | $4\mathbb{N}$                 | $2\mathbb{N}$                 | 230.149 III | $4\mathbb{N} \setminus \{4\}$        | –                                    |
| 76.11 IV   | $8\mathbb{N}$  | $4\mathbb{N}$                 | 112.265 IV  | $4\mathbb{N}$  | $2\mathbb{N} \setminus \{2\}$ | 205.36 IV   | $8\mathbb{N}$                 | $4\mathbb{N}$                 |             |                                      |                                      |
| 77.17 IV   | $4\mathbb{N}$  | $2\mathbb{N}$                 | 114.281 IV  | $4\mathbb{N}$  | $2\mathbb{N}$                 | 206.37 I    | $4\mathbb{N}$                 | $2\mathbb{N} \setminus \{2\}$ |             |                                      |                                      |
| 78.23 IV   | $8\mathbb{N}$  | $4\mathbb{N}$                 | 122.338 IV  | $4\mathbb{N}$  | $2\mathbb{N}$                 | 210.55 IV   | $4\mathbb{N}$                 | $2\mathbb{N}$                 |             |                                      |                                      |

$\mathbb{N}$ : The set of natural numbers

$\{\nu\}_{AI}$ : Set of fillings for which physical atomic insulators are possible

$\{\nu\}_{BS}$ : Set of fillings for which physical band structure are possible; a dash (–) indicates  $\{\nu\}_{BS} = \{\nu\}_{AI}$  for that MSG
